# Supplementary material for: Direct synthesis of N-aryl/alkyl 3-carbonylpyrroles from the Morita–Baylis–Hillman acetate of 2,2-dimethoxyacetaldehyde and a primary amine
Source: Royal Society of Chemistry journal article supplement (doi:10.1039/d1gc03635a), 2021-01-01
Supplement: d1gc03635a1.pdf [file d1gc03635a1.pdf]

## Supporting Information

Direct synthesis of *N*-aryl/alkyl  $\beta$ -carbonylpyrrole from Morita–Baylis–Hillman acetate of 2,2-dimethoxyacetaldehyde and primary amine

Luxia Guo,<sup>a</sup> Jiaqi Li,<sup>b</sup> Luigi Vaccaro,<sup>c</sup> Minghao Li,<sup>a,\*</sup> Yanlong Gu<sup>\*a,b,d</sup>

<sup>a</sup> Key Laboratory for Large-Format Battery Materials and System, Ministry of Education, Huazhong University of Science and Technology (HUST), 1037 Luoyu road, Hongshan District, Wuhan 430074, People's Republic of China.

E-mail: liminghaochem@hust.edu.cn; klgyl@hust.edu.cn.

<sup>b</sup> School of Chemistry and Chemical Engineering, The Key Laboratory for Green Processing of Chemical Engineering of Xinjiang Bingtuan, Shihezi University, Shihezi City 832004, China

<sup>c</sup> Laboratory of Green S.O.C., Dipartimento di Chimica, biologia e Biotecnologie, Università degli Studi di Perugia, Via Elce di Sotto 8, 06123 Perugia, Italy.

<sup>d</sup> State Key Laboratory for Oxo Synthesis and Selective Oxidation, Lanzhou Institute of Chemical Physics, Lanzhou, 730000, People's Republic of China

### Table of contents

|                                                                                                          |         |
|----------------------------------------------------------------------------------------------------------|---------|
| <b>1. General information</b> .....                                                                      | S2      |
| <b>2. Synthesis of substituted pyrroles from MBH adducts (Scheme S1)</b> .....                           | S2      |
| <b>3. Condition optimization for the reaction of MBH alcohol and <i>p</i>-toluidine (Table S1)</b> ..... | S3      |
| <b>4. General procedure for the synthesis of MBH acetates</b> .....                                      | S4      |
| <b>5. General procedure for the reaction of MBH acetates and amine</b> .....                             | S4      |
| <b>6. The procedure for preparation of 4a</b> .....                                                      | S4      |
| <b>7. The procedure for preparation of JMC-2004</b> .....                                                | S5      |
| <b>8. The procedure for preparation of 5a</b> .....                                                      | S5      |
| <b>9. The procedure for scaled-up preparation of 3ah</b> .....                                           | S5      |
| <b>10. E-factor and Eco-Scale value calculation (Scheme S2)</b> .....                                    | S7      |
| <b>11. Characterization data of products</b> .....                                                       | S9–S20  |
| <b>12. <sup>1</sup>H NMR and <sup>13</sup>C NMR spectra of products</b> .....                            | S21–S72 |
| <b>13. Reference</b> .....                                                                               | S73     |

## 1. General information

Unless otherwise noted, all reagents were purchased from commercial suppliers and used without further purification. The reactions were monitored by TLC with Haiyang GF-254 silica gel plates (Qingdao Haiyang chemical industry Co. Ltd, Qingdao, China) using UV light or  $\text{KMnO}_4$  as visualizing agents as needed. Flash column chromatography was performed using 200-300 mesh silica gel at increased pressure.  $^1\text{H}$  NMR spectra and  $^{13}\text{C}$  NMR spectra were respectively recorded on Brüker AV-400 spectrometers. Chemical shifts ( $\delta$ ) were expressed in ppm relative to  $\text{Me}_4\text{Si}$  in  $\text{CDCl}_3$  or  $\text{DMSO}-d_6$ , and coupling constants ( $J$ ) were reported in Hz. High-resolution mass spectra (HRMS) were obtained on Brüker Compass Data Analysis 4.0. Melting points were determined on a microscopic melting point apparatus and are uncorrected. IR spectra were recorded on a Bruker FT-IR (EQUINOX 55) using KBr pellets or neat liquid technology.

## 2. Scheme S1 Synthesis of substituted pyrroles from MBH adducts

(a) Synthesis of poly-substituted pyrroles from MBH alcohols via the [3+1+N] annulation strategy (Kim's work)

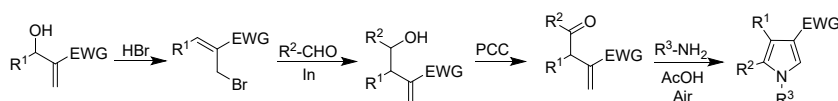

(b) Synthesis of poly-substituted pyrroles from MBH acetates of acetylenic aldehydes (Reddy's work)

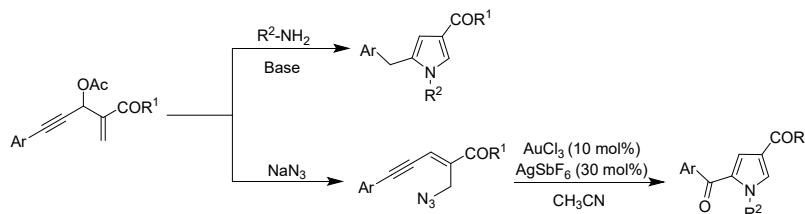

(c) Synthesis of poly-substituted pyrroles from MBH alcohols via cascade oxidation, stetter reaction, and cyclization (Coelho's work)

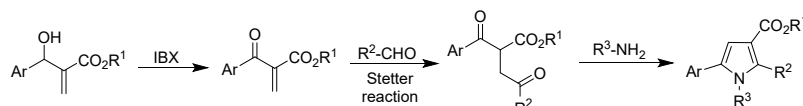

(d) Synthesis of N-substituted 3-carbonylpyrroles from MBH acetate via [4+1] cyclization (this work)

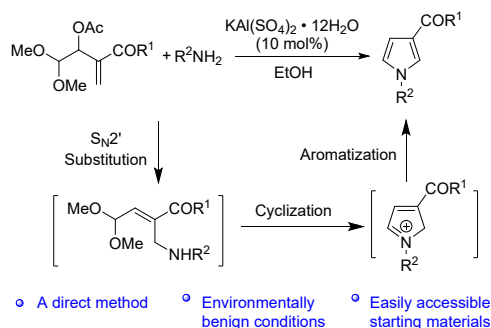

Scheme S1. Synthesis of substituted pyrroles from MBH adducts

### 3. Table S1 Condition optimization for the reaction of MBH alcohol and *p*-toluidine

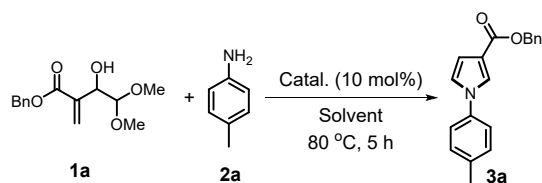

| Entry <sup>a</sup> | Catal. (mol%)                                         | Solvent                         | Yield (%) <sup>b</sup> |
|--------------------|-------------------------------------------------------|---------------------------------|------------------------|
| 1                  | TFA                                                   | 1,4-Dioxane                     | 37                     |
| 2                  | BF <sub>3</sub> · Et <sub>2</sub> O                   | 1,4-Dioxane                     | Trace                  |
| 3                  | NiCl <sub>2</sub>                                     | 1,4-Dioxane                     | N.R.                   |
| 4                  | AlCl <sub>3</sub>                                     | 1,4-Dioxane                     | 15                     |
| 5                  | BiCl <sub>3</sub>                                     | 1,4-Dioxane                     | Trace                  |
| 6                  | Sc(OTf) <sub>3</sub>                                  | 1,4-Dioxane                     | 20                     |
| 7                  | Bi(OTf) <sub>3</sub>                                  | 1,4-Dioxane                     | 73%                    |
| 8                  | Ni(ClO <sub>4</sub> ) <sub>2</sub> ·6H <sub>2</sub> O | 1,4-Dioxane                     | N.R.                   |
| 9                  | Bi(OTf) <sub>3</sub>                                  | CH <sub>3</sub> CN              | 30                     |
| 10                 | Bi(OTf) <sub>3</sub>                                  | CH <sub>3</sub> NO <sub>2</sub> | 48                     |
| 11                 | Bi(OTf) <sub>3</sub>                                  | Toluene                         | 21                     |
| 12                 | Bi(OTf) <sub>3</sub>                                  | DCE                             | 47                     |
| 13                 | Bi(OTf) <sub>3</sub>                                  | PEG-400                         | N.R.                   |
| 14                 | Bi(OTf) <sub>3</sub>                                  | DMI                             | Trace                  |
| 15 <sup>c</sup>    | Bi(OTf) <sub>3</sub>                                  | 1,4-Dioxane                     | 36                     |
| 16 <sup>d</sup>    | Bi(OTf) <sub>3</sub>                                  | 1,4-Dioxane                     | 78                     |

<sup>a</sup>Reaction conditions: unless otherwise noted, all reactions were performed with **1a** (0.30 mmol), **2a** (0.30 mmol), in solvent (1 mL). <sup>b</sup>Isolated yield. <sup>c</sup>40 °C, 10 h. <sup>d</sup>**1a** (0.36 mmol).

#### 4. General procedure for the synthesis of MBH acetates.

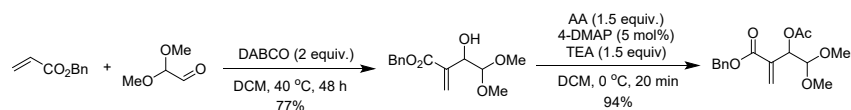

**Step I: Preparation of MBH alcohol 1a:** benzyl acrylate (2.43 g, 15 mmol) and DABCO (1.68 g, 15 mmol) was mixed with DCM (15 mL) in a 100 mL of round bottomed flask equipped with a magnetic stirring bar. The mixture was stirred at room temperature until dissolution completely. Then the 2,2-dimethoxyacetaldehyde (60 wt. % in H<sub>2</sub>O, 1.73 g, 10 mmol) was added. The mixture was stirred at 40 °C for 48 h. After completion of reaction, the mixture washed with 0.5 M HCl solution (3 × 15 mL). The organic phase was washed with brine (30 mL) and dried over Na<sub>2</sub>SO<sub>4</sub>. After removing volatile components, the organic residue was subjected to silica column chromatography for isolation (eluting solution: petroleum ether / ethyl acetate = 10/1 (v/v)) to yield a colourless transparent liquid (MBH alcohol, 2.07 g, 77% yield).

**Step II: Preparation of MBH acetates 1b:** To a solution of MBH alcohol (2.66 g, 10 mmol) prepared by Step I, Ac<sub>2</sub>O (1.5 g, 1.5 equiv.), 4-dimethylaminopyridine (DMAP, 0.06g, 5 mol%), and Et<sub>3</sub>N (1.5 g, 1.5 equiv.) in anhydrous dichloromethane (15 mL) were added. The mixture was stirred at 0 °C for 20 min. Upon completion of the reaction, the mixture was washed with a saturated solution of NaHCO<sub>3</sub> in 20 mL of water. The organic phase was collected and dried over anhydrous sodium sulphate. After filtration and concentration, the organic residue was subjected to silica column chromatography (eluting solution: petroleum ether / ethyl acetate = 20/1 (v/v)) and the MBH acetate was obtained as a yellow liquid.

Tests for different MBH acetates were all performed with an analogous procedure.

#### 5. General procedure for the reaction of MBH acetates and primary amine

In a 10 mL of V-type flask equipped with a triangle magnetic stirring bar, MBH acetate **1a** (0.3 mmol, 79.8 mg) and *p*-toluidine (0.3 mmol, 32.1 mg) were dissolved in EtOH (1 mL), then KAl(SO<sub>4</sub>)<sub>2</sub>·6H<sub>2</sub>O (10 mol%, 0.03 mmol, 21.9 mg) was added. The mixture was stirred at 80 °C for 5 h. After the reaction was completed, the mixture was cooled to room temperature, and directly subjected to preparative TLC plate for isolation (eluting solution: petroleum ether / ethyl acetate = 20/1 (v/v)). The 3-carbonylpyrrole **3a** was obtained as a yellow liquid (78.6 mg, yield = 90%). Tests for substrate scope were all performed with an analogous procedure.

#### 6. The procedure for preparation of 4a

Benzyl 1-(3-hydroxyphenyl)-1*H*-pyrrole-3-carboxylate (58.8 mg, 0.2 mmol) and KOH (3 equiv. 58 mg) were added in EtOH (5 mL) in a 25 mL of round bottomed flask equipped with a magnetic stirring bar. The mixture was then stirred at 80 °C for 6 h. After completion of reaction (TLC), the mixture was naturalized with HCl solution to pH = 4. The organic phase was washed with brine (5 mL) and dried over Na<sub>2</sub>SO<sub>4</sub>. After removing organic phase, the crude product was dissolved in anhydrous THF (2 ml). Then the oxalyl chloride (3 equiv.) and one drop of DMF were added. The mixture was stirring at 0 °C for 20 min following by evaporation on a rotary evaporator. Subsequently the residue was dissolved in anhydrous THF (2 ml) and NH<sub>3</sub> (aq, 1 ml) was added at

room temperature. After completion of reaction, the mixture was extracted by ethyl acetate, dried over anhydrous  $\text{Na}_2\text{SO}_4$ , and concentrated on a rotary evaporator. Finally, the residual was subjected to preparative TLC plate for isolation (eluting solution:  $\text{CHCl}_3 / \text{MeOH} = 95/5$  (v/v)). The product 4a was obtained as a yellow solid (33.1 mg, 82% yield).

#### **7. The procedure for preparation of JMC-2004**

The compound 3ak (93.9 mg, 0.3 mmol) was dissolved in anhydrous DCM (2 ml) in a 5 mL of round bottomed flask equipped with a magnetic stirring bar at 0 °C. Then  $\text{BBr}_3$  (5.0 equiv.) was added slowly at 0 °C. Subsequently, the mixture was stirred at room temperature for 12 h. After completion of addition, the mixture was directly subjected to preparative TLC plate for isolation (eluting solution: PE / EA = 5/1 (v/v)). The product JMH-2004 was obtained as a colorless liquid (78.0 mg, 87% yield).

#### **8. The procedure for preparation of 5a**

In a 10 mL of V-type flask equipped with a magnetic stirring bar, 3ai (0.3 mmol, 68.7 mg) and 2,5-dimethoxy-2,5-dihydrofuran (0.3 mmol, 39.6 mg) were dissolved in EtOH (1 mL). Then the TfOH (0.06 mmol, 9.0 mg) was added to the mixture. The mixture was stirring for 5 h under fluxing condition. After the reaction was completed, the mixture was cooled to room temperature and the mixture was directly subjected to preparative TLC plate for isolation (eluting solution: petroleum ether / ethyl acetate = 10/1 (v/v)). The product 5a was obtained as a colorless liquid (67.8 mg, 81% yield).

#### **9. The procedure for scaled-up preparation of 3ah**

In a 100 mL of round-bottom flask equipped with a magnetic stirring, MBH acetate of 2,2-dimethoxyacetaldehyde and ethyl acrylate (10 mmol, 2.46 g), aniline (10 mmol, 0.93 g) were dissolved in EtOH (20 mL). Then the  $\text{KAl}(\text{SO}_4)_2 \cdot 12\text{H}_2\text{O}$  (1 mmol, 0.47 g) was added. The mixture was stirred at 80 °C for 5 h. After the reaction was completed, the catalyst was recovered by filtration and the filtrate was concentrated by rotary evaporation. The residual was subjected to silica gel column chromatography for isolation (eluting solution: petroleum ether / ethyl acetate = 50/1 (v/v)). 1.76 gram of 3ah was obtained (yield = 82%).

It is noted that although 88% (w/w) catalyst can be recovered, the catalytic activity of recovered catalyst significantly decreased, which might be resulted from the changes of surface chemical composition and crystalline structure (**Figure S1**).

### a. XPS surface element analysis

Quantify By

| Component | BE [eV] | FWHM [eV] | RSF  | Atomic conc. [%] | Error [%] | Mass conc. [%] | Error [%] |
|-----------|---------|-----------|------|------------------|-----------|----------------|-----------|
| S 2p      | 169.11  | 0.00      | 0.67 | 11.3             | 0.28      | 19.6           | 0.44      |
| C 1s      | 285.06  | 0.00      | 0.28 | 31.4             | 0.51      | 20.4           | 0.36      |
| K 2p      | 293.11  | 0.00      | 1.47 | 6.7              | 0.14      | 14.2           | 0.27      |
| O 1s      | 532.16  | 0.00      | 0.78 | 46.8             | 0.60      | 40.4           | 0.57      |
| Al 2p     | 75.61   | 0.00      | 0.19 | 3.7              | 0.20      | 5.4            | 0.28      |

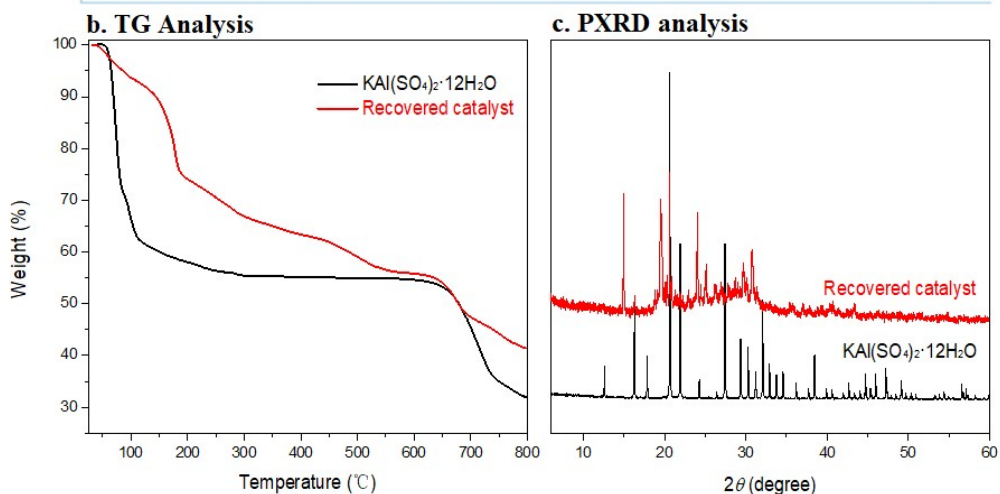

**Figure S1** Characterizations of recovered catalyst

## 10. Scheme S2 E-factor and Eco-Scale value calculation

(a) *E*-factor and Eco-Scale value calculation based on the scaled-up process for our method

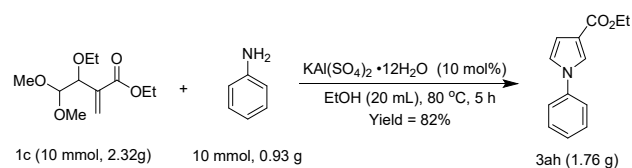

|                           |                                                       |        |         |             |
|---------------------------|-------------------------------------------------------|--------|---------|-------------|
| Reactant 1                | 1c                                                    | 2.46 g | 10 mmol | FW = 232.28 |
| Reactant 2                | aniline                                               | 0.93 g | 10 mmol | FW = 93.13  |
| Catalyst                  | KAl(SO <sub>4</sub> ) <sub>2</sub> 12H <sub>2</sub> O | 0.47 g | 1 mmol  | FW = 474.39 |
| Solvent                   | EtOH (20 mL)                                          | 15.7 g |         |             |
| Product                   | 3ah                                                   | 1.76 g |         |             |
| Recovered solvent (18 mL) |                                                       | 14.3 g |         |             |

$$E\text{-factor} = \frac{2.46 + 0.93 + 0.47 + 15.7 - 14.3}{1.76} = 2.99 \text{ Kg waste/1 Kg product}$$

The penalty points to calculate the EcoScale

| Parameter points                                                           | Penalty |
|----------------------------------------------------------------------------|---------|
| 1. Yield (100 - %yield)/2                                                  | 9       |
| 2. Price of reaction components (to obtain 10 mmol of end product)         |         |
| a. 1c = 3.00 g = \$5.38 (synthetic cost)                                   |         |
| b. aniline = 1.13 g = \$0.12                                               |         |
| c. KAl(SO <sub>4</sub> ) <sub>2</sub> 12H <sub>2</sub> O = 0.57 g = \$0.12 |         |
| d. EtOH = 25 mL = \$3.15                                                   |         |
| Total price = 8.77                                                         |         |
| Thus, inexpensive (< \$10)                                                 | 0       |
| 3. Safety                                                                  |         |
| solvent: EtOH                                                              |         |
| Toxic (T)                                                                  | 5       |
| Highly flammable (F)                                                       | 5       |
| 4. Technical setup                                                         |         |
| Common setup                                                               | 0       |
| 5. Temperature/time                                                        |         |
| Heating, > 1 h                                                             | 3       |
| 6. Workup and purification                                                 |         |
| Removal of solvent with bp < 150 °C                                        | 0       |
| Classical chromatography                                                   | 10      |
| Total penalty points                                                       | 32      |

$$EcoScale = 100 - 32 = 68 \text{ (an acceptable synthesis)}$$

EcoScale: > 75, excellent; > 50, acceptable; < 50, inadequate

(b) *E*-factor and Eco-Scale value calculation for the patented method (Eur. Pat. Appl., EP 771790 A1, 1997)

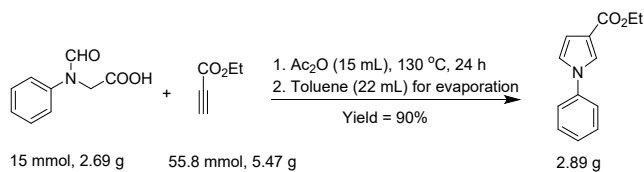

|            |                                           |        |           |             |
|------------|-------------------------------------------|--------|-----------|-------------|
| Reactant 1 | <i>N</i> -formyl- <i>N</i> -phenylglycine | 2.69g  | 15 mmol   | FW = 179.18 |
| Reactant 2 | Ethyl propiolate                          | 5.47 g | 55.8 mmol | FW =98.10   |
| Solvent 1  | Acetic anhydride (15 mL)                  | 16.1 g |           |             |
| Solvent 2  | Toluene (22 mL)                           | 19.2 g |           |             |
| Product    |                                           | 2.89 g |           |             |

$$E\text{-factor} = \frac{2.69 + 5.47 + 16.1 + 19.2}{2.89} = 15.04 \text{ Kg waste/1 Kg product}$$

The penalty points to calculate the EcoScale

| Parameter                                                                       | Penalty points |
|---------------------------------------------------------------------------------|----------------|
| 1. Yield (100 - %yield)/2                                                       | 5              |
| 2. Price of reaction components (to obtain 10 mmol of end product)              |                |
| a. <i>N</i> -formyl- <i>N</i> -phenylglycine = 2.00 g = \$5.07 (synthetic cost) |                |
| b. Ethyl propiolate = 4.05 g = \$14.3                                           |                |
| c. Ac <sub>2</sub> O = 11 mL = \$1.2                                            |                |
| d. Toluene = 16 mL = \$0.55                                                     |                |
| Total price = \$21.12                                                           |                |
| Tus, expensive (> \$10 and < \$50)                                              | 3              |
| 3. Safety                                                                       |                |
| solvent: Ac <sub>2</sub> O and Toluene                                          |                |
| Toxic (T)                                                                       | 5              |
| Highly flammable (F)                                                            | 5              |
| 4. Technical setup                                                              |                |
| Common setup                                                                    | 0              |
| 5. Temperature/time                                                             |                |
| Heating, > 1 h                                                                  | 3              |
| 6. Workup and purification                                                      |                |
| Removal of solvent with bp < 150 °C                                             | 0              |
| Classical chromatography                                                        | 10             |
| Total penalty points                                                            | 31             |

**EcoScale = 100 - 31 = 69 (an acceptable synthesis)**

EcoScale: > 75, excellent; > 50, acceptable; < 50, inadequate



## 11. Characterization data of products

### Benzyl 3-hydroxy-4,4-dimethoxy-2-methylenebutanoate (1a)

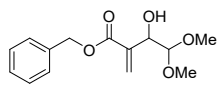

The crude mixture was purified by silica column chromatography (petroleum ether to petroleum ether/ethyl acetate = 10/1 v/v gradient elution) to yield the title compound as a colorless liquid with 77% yield.  $^1\text{H}$  NMR (400 MHz,  $\text{CDCl}_3$ )  $\delta$  7.41 – 7.28 (m, 5H), 6.41 – 6.36 (m, 1H), 5.98 (s, 1H), 5.23 (d,  $J$  = 1.3 Hz, 2H), 4.58 (d,  $J$  = 4.6 Hz, 1H), 4.42 (d,  $J$  = 5.0 Hz, 1H), 3.41 (s, 3H), 3.36 (s, 3H), 2.92 (d,  $J$  = 5.3 Hz, 1H) ppm.  $^{13}\text{C}\{^1\text{H}\}$  NMR (100 MHz,  $\text{CDCl}_3$ )  $\delta$  166.1, 138.7, 135.8, 128.6, 128.3, 128.2, 127.3, 105.6, 71.0, 66.6, 55.5, 55.0 ppm. IR:  $\nu$  = 3475, 3033, 2942, 2835, 1718, 1631, 1499, 1455, 1381, 1271, 1157, 1125, 1078, 972, 818, 752, 699, 701, 492  $\text{cm}^{-1}$ . HRMS (ESI):  $m/z$  calcd for  $\text{C}_{14}\text{H}_{18}\text{O}_5$ ,  $[\text{M} + \text{Na}]^+$ : 289.1046, found: 289.1046.

### Benzyl 3-acetoxy-4,4-dimethoxy-2-methylenebutanoate (1b)

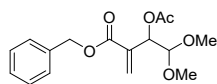

The crude mixture was purified by silica column chromatography (petroleum ether to petroleum ether/ethyl acetate = 20/1 v/v gradient elution) to yield the title compound as a colorless liquid with 94% yield.  $^1\text{H}$  NMR (400 MHz,  $\text{CDCl}_3$ )  $\delta$  7.43 – 7.29 (m, 5H), 6.41 (d,  $J$  = 1.0 Hz, 1H), 5.92 (t,  $J$  = 1.0 Hz, 1H), 5.81 (dd,  $J$  = 5.8, 1.0 Hz, 1H), 5.26 – 5.17 (m, 2H), 4.58 (d,  $J$  = 5.8 Hz, 1H), 3.35 (d,  $J$  = 16.4 Hz, 6H), 2.10 (s, 3H) ppm.  $^{13}\text{C}\{^1\text{H}\}$  NMR (100 MHz,  $\text{CDCl}_3$ )  $\delta$  169.5, 165.1, 136.7, 135.8, 128.5, 128.3, 128.2, 128.1, 104.0, 70.5, 66.7, 55.5, 54.2, 21.0 ppm. IR:  $\nu$  = 3034, 2943, 2836, 1745, 1634, 1455, 1373, 1264, 1235, 1156, 1037, 979, 815, 752, 699, 604  $\text{cm}^{-1}$ . HRMS (ESI):  $m/z$  calcd for  $\text{C}_{16}\text{H}_{20}\text{O}_6$ ,  $[\text{M} + \text{Na}]^+$ : 331.1152, found: 331.1152.

### Ethyl 3-hydroxy-4,4-dimethoxy-2-methylenebutanoate

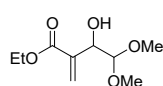

The crude mixture was purified by silica column chromatography (petroleum ether to petroleum ether/ethyl acetate = 10/1 v/v gradient elution) to yield the title compound as a colorless liquid with 72% yield.  $^1\text{H}$  NMR (400 MHz,  $\text{CDCl}_3$ )  $\delta$  6.34 (d,  $J$  = 1.2 Hz, 1H), 5.95 (t,  $J$  = 1.3 Hz, 1H), 4.55 (d,  $J$  = 4.5 Hz, 1H), 4.45 (d,  $J$  = 5.0 Hz, 1H), 4.25 (q,  $J$  = 7.2 Hz, 2H), 3.43 (d,  $J$  = 11.6 Hz, 6H), 2.91 (d,  $J$  = 5.4 Hz, 1H), 1.32 (t,  $J$  = 7.1 Hz, 3H) ppm.  $^{13}\text{C}\{^1\text{H}\}$  NMR (100 MHz,  $\text{CDCl}_3$ )  $\delta$  166.3, 138.7, 126.8, 105.5, 71.2, 60.9, 55.4, 55.1, 14.2 ppm. IR:  $\nu$  = 3472, 2940, 2836, 1717, 1631, 1449, 1372, 1327, 1178, 1155, 1626, 977, 886, 816, 697  $\text{cm}^{-1}$ . HRMS (ESI):  $m/z$  calcd for  $\text{C}_9\text{H}_{16}\text{O}_5$ ,  $[\text{M} + \text{Na}]^+$ : 227.0890, found: 227.0890.

### 3-Benzoyl-1,1-dimethoxybut-3-en-2-yl acetate (1c)

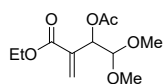

The crude mixture was purified by silica column chromatography (petroleum ether to petroleum ether/ethyl acetate = 20/1 v/v gradient elution) to yield the title compound as a colorless liquid with 91% yield.  $^1\text{H}$  NMR (400 MHz,  $\text{CDCl}_3$ )  $\delta$  6.40 – 6.33 (m, 1H), 5.93 – 5.87 (m, 1H), 5.84 – 5.76 (m, 1H), 4.71 – 4.41 (m, 1H), 4.26 (dt,  $J$  = 7.5, 3.6 Hz, 2H), 3.55 – 3.05 (m, 6H), 2.24 – 1.92 (m, 3H), 1.44 – 1.21 (m, 3H) ppm.  $^{13}\text{C}\{^1\text{H}\}$  NMR (100 MHz,  $\text{CDCl}_3$ )  $\delta$  164.7, 160.4, 132.1, 122.8, 99.2, 65.7, 56.1, 50.6, 49.5, 16.1, 9.3 ppm. IR:  $\nu$  = 2947, 2840, 1719, 1632, 1450, 1372, 1329, 1183, 1155, 1146, 1044, 979, 887, 820, 688  $\text{cm}^{-1}$ . HRMS (ESI):  $m/z$  calcd for  $\text{C}_{11}\text{H}_{18}\text{O}_6$ ,  $[\text{M} + \text{Na}]^+$ : 269.0996, found: 269.0996.

### 3-Hydroxy-4,4-dimethoxy-2-methylene-1-phenylbutan-1-one

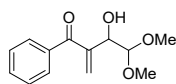

The crude mixture was purified by silica column chromatography (petroleum ether to petroleum ether/ethyl acetate = 10/1 v/v gradient elution) to yield the title compound as a colorless liquid with 63% yield.  $^1\text{H}$  NMR (400 MHz,  $\text{CDCl}_3$ )  $\delta$  7.91 – 7.74 (m, 2H), 7.62 – 7.51 (m, 1H), 7.45 (t,  $J = 7.6$  Hz, 2H), 6.13 (s, 1H), 5.71 (s, 1H), 4.78 (d,  $J = 5.3$  Hz, 1H), 4.44 (d,  $J = 5.3$  Hz, 1H), 3.43 (s, 3H), 3.36 (s, 3H), 3.26 – 3.20 (m, 1H) ppm.  $^{13}\text{C}\{^1\text{H}\}$  NMR (101 MHz,  $\text{CDCl}_3$ )  $\delta$  197.8, 145.8, 137.3, 132.7, 129.8, 128.3, 125.8, 105.8, 71.9, 55.4, 54.7 ppm. IR:  $\nu = 3480, 2943, 1708, 1653, 1624, 1500, 1372, 1340, 1184, 1105, 1142, 1042, 1006, 979, 961, 887, 820, 688$   $\text{cm}^{-1}$ . HRMS (ESI):  $m/z$  calcd for  $\text{C}_{13}\text{H}_{16}\text{O}_4$ ,  $[\text{M} + \text{Na}]^+$ : 259.0941, found: 259.0940.

### 3-Benzoyl-1,1-dimethoxybut-3-en-2-yl acetate

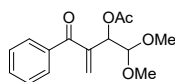

The crude mixture was purified by silica column chromatography (petroleum ether to petroleum ether/ethyl acetate = 20/1 v/v gradient elution) to yield the title compound as a colorless liquid with 90% yield.  $^1\text{H}$  NMR (400 MHz,  $\text{CDCl}_3$ )  $\delta$  7.83 – 7.75 (m, 2H), 7.55 (d,  $J = 2.3$  Hz, 1H), 7.49 – 7.40 (m, 2H), 6.07 – 6.01 (m, 1H), 5.99 (d,  $J = 5.6$  Hz, 1H), 5.72 (d,  $J = 2.5$  Hz, 1H), 4.59 (dd,  $J = 5.6, 2.4$  Hz, 1H), 3.37 (dd,  $J = 6.2, 2.4$  Hz, 6H), 2.16 (d,  $J = 2.6$  Hz, 3H).  $^{13}\text{C}\{^1\text{H}\}$  NMR (100 MHz,  $\text{CDCl}_3$ )  $\delta$  195.7, 169.6, 143.8, 137.3, 132.6, 129.7, 128.3, 125.8, 104.1, 71.3, 55.60, 54.1, 21.0 ppm. IR:  $\nu = 2933, 1710, 1651, 1643, 1504, 1370, 1345, 1191, 1107, 1176, 1003, 979, 964, 890, 827, 690$   $\text{cm}^{-1}$ . HRMS (ESI):  $m/z$  calcd for  $\text{C}_{15}\text{H}_{18}\text{O}_5$ ,  $[\text{M} + \text{Na}]^+$ : 301.1046, found: 301.1046.

### Benzyl 1-(p-tolyl)-1H-pyrrole-3-carboxylate (3a)

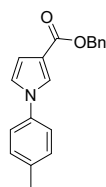

The crude mixture was purified by preparative TLC plate (petroleum ether/ethyl acetate = 20/1 v/v as the eluent) to yield the title compound as a yellow liquid with 90% yield.  $^1\text{H}$  NMR (400 MHz,  $\text{CDCl}_3$ )  $\delta$  7.68 (t,  $J = 2.0$  Hz, 1H), 7.46 – 7.42 (m, 2H), 7.38 (t,  $J = 7.2$  Hz, 2H), 7.33 (d,  $J = 7.0$  Hz, 1H), 7.28 (d,  $J = 8.5$  Hz, 2H), 7.24 (d,  $J = 8.3$  Hz, 2H), 6.99 (s, 1H), 6.78 (dd,  $J = 3.0, 1.6$  Hz, 1H), 5.31 (s, 2H), 2.39 (s, 3H) ppm.  $^{13}\text{C}\{^1\text{H}\}$  NMR (100 MHz,  $\text{CDCl}_3$ )  $\delta$  164.5, 137.5, 136.8, 136.7, 130.3, 128.5, 128.1, 128.0, 124.7, 121.0, 120.7, 117.5, 111.50, 65.6, 20.9 ppm. IR:  $\nu = 3133, 3030, 2952, 1780, 1602, 1543, 1511, 1455, 1430, 1403, 1360, 1258, 1222, 1131, 1080, 981, 906, 756, 692, 598, 550, 508$   $\text{cm}^{-1}$ . HRMS (ESI):  $m/z$  calcd for  $\text{C}_{19}\text{H}_{17}\text{NO}_2$ ,  $[\text{M} + \text{Na}]^+$ : 314.1151, found: 314.1152.

### Benzyl 1-phenyl-1H-pyrrole-3-carboxylate (3b)

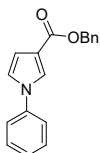

The crude mixture was purified by preparative TLC plate (petroleum ether/ethyl acetate = 20/1 v/v as the eluent) to yield the title compound as a yellow liquid with 90% yield.  $^1\text{H}$  NMR (400 MHz,  $\text{CDCl}_3$ )  $\delta$  7.72 (d,  $J = 2.0$  Hz, 1H), 7.50 – 7.28 (m, 10H), 7.02 (s, 1H), 6.83 – 6.75 (m, 1H), 5.31 (s, 2H) ppm.  $^{13}\text{C}\{^1\text{H}\}$  NMR (100 MHz,  $\text{CDCl}_3$ )  $\delta$  164.5, 139.9, 136.7, 129.8, 128.5, 128.1, 128.0, 126.9, 124.6, 121.0, 120.7, 117.8, 111.7, 65.7 ppm. IR:  $\nu = 3138, 3033, 2952, 1780, 1600, 1543, 1509, 1456, 1403, 1361, 1258, 1220, 1132, 1079, 980, 908, 756, 693, 593, 548, 512$   $\text{cm}^{-1}$ . HRMS (ESI):  $m/z$  calcd for  $\text{C}_{18}\text{H}_{15}\text{NO}_2$ ,  $[\text{M} + \text{H}]^+$ : 278.1176, found: 278.1175.

### Benzyl 1-(4-(tert-butyl)phenyl)-1H-pyrrole-3-carboxylate (3c)

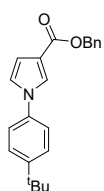

The crude mixture was purified by preparative TLC plate (petroleum ether/ethyl acetate = 20/1 v/v as the eluent) to yield the title compound as a yellow liquid with 92% yield. <sup>1</sup>H NMR (400 MHz, CDCl<sub>3</sub>) δ 7.69 (s, 1H), 7.45 (dd, *J* = 8.0, 5.8 Hz, 4H), 7.37 (s, 2H), 7.31 (d, *J* = 8.7 Hz, 3H), 6.99 (s, 1H), 6.78 (d, *J* = 1.3 Hz, 1H), 5.31 (s, 2H), 1.34 (s, 9H) ppm. <sup>13</sup>C{<sup>1</sup>H} NMR (100 MHz, CDCl<sub>3</sub>) δ 164.6, 150.1, 137.4, 136.7, 128.5, 128.1, 128.0, 126.6, 124.7, 120.7, 117.5, 111.5, 65.6, 34.6, 31.3 ppm. IR: ν = 3609, 3545, 3395, 2961, 2868, 1705, 1541, 1522, 1457, 1362, 1258, 1211, 1138, 1005, 937, 368, 756, 697, 564, 457 cm<sup>-1</sup>. HRMS (ESI): *m/z* calcd for C<sub>22</sub>H<sub>23</sub>NO<sub>2</sub>, [M + H]<sup>+</sup>: 334.1802, found: 334.1801.

### Benzyl 1-(4-methoxyphenyl)-1H-pyrrole-3-carboxylate (3d)

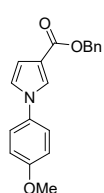

The crude mixture was purified by preparative TLC plate (petroleum ether/ethyl acetate = 20/1 v/v as the eluent) to yield the title compound as a yellow liquid with 87% yield. <sup>1</sup>H NMR (400 MHz, CDCl<sub>3</sub>) δ 7.62 (t, *J* = 1.9 Hz, 1H), 7.49 – 7.42 (m, 2H), 7.38 (t, *J* = 7.2 Hz, 2H), 7.35 – 7.28 (m, 3H), 7.02 – 6.90 (m, 3H), 6.77 (dd, *J* = 3.0, 1.7 Hz, 1H), 5.31 (s, 2H), 3.84 (s, 3H) ppm. <sup>13</sup>C{<sup>1</sup>H} NMR (100 MHz, CDCl<sub>3</sub>) δ 164.6, 158.5, 136.7, 133.4, 128.5, 128.1, 128.0, 124.9, 122.6, 121.0, 117.3, 114.8, 111.4, 65.6, 55.6 ppm. IR: ν = 3136, 2918, 1707, 1540, 1519, 1457, 1400, 1252, 1218, 1132, 1045, 980, 829, 757, 697, 619 cm<sup>-1</sup>. HRMS (ESI): *m/z* calcd for C<sub>19</sub>H<sub>13</sub>NO<sub>3</sub>, [M + H]<sup>+</sup>: 330.1101, found: 330.1101.

### Benzyl 1-(4-phenoxyphenyl)-1H-pyrrole-3-carboxylate(3e)

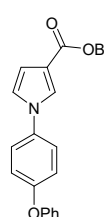

The crude mixture was purified by preparative TLC plate (petroleum ether/ethyl acetate = 20/1 v/v as the eluent) to yield the title compound as a yellow liquid with 85% yield. <sup>1</sup>H NMR (400 MHz, CDCl<sub>3</sub>) δ 7.65 (t, *J* = 2.0 Hz, 1H), 7.47 – 7.33 (m, 2H), 7.37 – 7.28 (m, 7H), 7.14 (t, *J* = 7.4 Hz, 1H), 7.11 – 7.00 (m, 4H), 6.96 (t, *J* = 2.6 Hz, 1H), 6.78 (dd, *J* = 3.0, 1.7 Hz, 1H), 5.31 (s, 2H) ppm. <sup>13</sup>C{<sup>1</sup>H} NMR (100 MHz, CDCl<sub>3</sub>) δ 164.5, 156.8, 156.3, 136.7, 135.3, 130.0, 128.5, 128.1, 128.0, 124.8, 123.8, 122.7, 120.9, 119.7, 119.1, 117.7, 111.6, 65.6 ppm. IR: ν = 3136, 3034, 2919, 1709, 1542, 1514, 1489, 1401, 1362, 1239, 1133, 1077, 981, 869, 840, 755, 695, 593, 497 cm<sup>-1</sup>. HRMS (ESI): *m/z* calcd for C<sub>24</sub>H<sub>19</sub>NO<sub>3</sub>, [M + H]<sup>+</sup>: 370.1438, found: 370.1438.

### Benzyl 1-(4-(trifluoromethoxy)phenyl)-1H-pyrrole-3-carboxylate (3f)

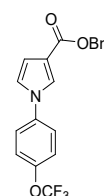

The crude mixture was purified by preparative TLC plate (petroleum ether/ethyl acetate = 20/1 v/v as the eluent) to yield the title compound as a yellow liquid with 72% yield. <sup>1</sup>H NMR (400 MHz, CDCl<sub>3</sub>) δ 7.68 (t, *J* = 2.0 Hz, 1H), 7.46 – 7.35 (m, 6H), 7.35 – 7.28 (m, 3H), 6.99 (t, *J* = 2.7 Hz, 1H), 6.81 (dd, *J* = 3.1, 1.6 Hz, 1H), 5.31 (s, 2H) ppm. <sup>13</sup>C{<sup>1</sup>H} NMR (100 MHz, CDCl<sub>3</sub>) δ 164.3, 147.6, 138.4, 136.5, 128.6, 128.1, 128.1, 124.6, 124.2 (q, <sup>1</sup>J<sub>C-F</sub> = 185.0 Hz), 122.4, 122.3, 120.7, 118.4, 112.2, 65.8 ppm. <sup>19</sup>F NMR (376 MHz, CDCl<sub>3</sub>) δ -58.05 (s, 3F) ppm. IR: ν = 3132, 3033, 2917, 2849, 1703, 1544, 1519, 1455, 1401, 1362, 1255, 1209, 1167, 1137, 1079, 982, 937, 846, 763, 698, 622, 524 cm<sup>-1</sup>. HRMS (ESI): *m/z* calcd for C<sub>19</sub>H<sub>14</sub>F<sub>3</sub>NO<sub>3</sub>, [M + H]<sup>+</sup>: 362.0999, found: 362.0998.

### Benzyl 1-(4-fluorophenyl)-1H-pyrrole-3-carboxylate (3g)

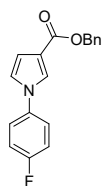

The crude mixture was purified by preparative TLC plate (petroleum ether/ethyl acetate = 20/1 v/v as the eluent) to yield the title compound as a yellow liquid with 83% yield. <sup>1</sup>H NMR (400 MHz, CDCl<sub>3</sub>) δ 7.64 (t, *J* = 2.0 Hz, 1H), 7.44 (d, *J* = 6.9 Hz, 2H), 7.42 – 7.30 (m, 5H), 7.15 (t, *J* = 8.5 Hz, 2H), 6.95 (t, *J* = 2.6 Hz, 1H), 6.79 (dd, *J* = 3.0, 1.6 Hz, 1H), 5.31 (s, 2H) ppm. <sup>13</sup>C{<sup>1</sup>H} NMR (100 MHz, CDCl<sub>3</sub>) δ 164.3, 161.3 (d, <sup>1</sup>*J*<sub>C-F</sub> = 245.0 Hz), 136.6, 136.1 (d, <sup>4</sup>*J*<sub>C-F</sub> = 3.0 Hz), 128.5, 128.1, 128.0, 124.8, 122.9 (d, <sup>3</sup>*J*<sub>C-F</sub> = 8.0 Hz), 120.9, 117.9, 116.5 (d, <sup>2</sup>*J*<sub>C-F</sub> = 22.0 Hz), 111.8, 65.7 ppm. <sup>19</sup>F NMR (376 MHz, CDCl<sub>3</sub>) δ -114.89 – -114.94 (m, 1F) ppm. IR: ν = 2918, 2850, 1707, 1544, 1517, 1454, 1399, 1362, 1259, 1218, 1133, 1078, 980, 835, 757, 697, 619, 458 cm<sup>-1</sup>. HRMS (ESI): *m/z* calcd for C<sub>18</sub>H<sub>14</sub>FNO<sub>2</sub>, [M + H]<sup>+</sup>: 296.1081, found: 296.1081.

### Benzyl 1-(4-chlorophenyl)-1H-pyrrole-3-carboxylate (3h)

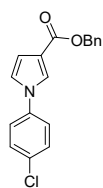

The crude mixture was purified by preparative TLC plate (petroleum ether/ethyl acetate = 20/1 v/v as the eluent) to yield the title compound as a yellow liquid with 81% yield. <sup>1</sup>H NMR (400 MHz, CDCl<sub>3</sub>) δ 7.67 (t, *J* = 2.0 Hz, 1H), 7.46 – 7.40 (m, 4H), 7.38 (s, 2H), 7.33 (d, *J* = 8.8 Hz, 3H), 6.98 (t, *J* = 2.7 Hz, 1H), 6.80 (dd, *J* = 3.1, 1.6 Hz, 1H), 5.31 (s, 2H) ppm. <sup>13</sup>C{<sup>1</sup>H} NMR (100 MHz, CDCl<sub>3</sub>) δ 164.3, 138.4, 136.6, 132.6, 129.9, 128.5, 128.2, 128.1, 124.5, 122.2, 120.6, 118.2, 112.1, 65.8 ppm. IR: ν = 3138, 3033, 2923, 2852, 1708, 1543, 1506, 1454, 1361, 1258, 1221, 1134, 1095, 980, 933, 823, 755, 698, 595, 518, 474 cm<sup>-1</sup>. HRMS (ESI): *m/z* calcd for C<sub>18</sub>H<sub>14</sub>ClNO<sub>2</sub>, [M + H]<sup>+</sup>: 312.0786, found: 312.0786.

### Benzyl 1-(4-bromophenyl)-1H-pyrrole-3-carboxylate (3i)

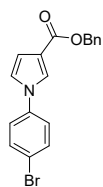

The crude mixture was purified by preparative TLC plate (petroleum ether/ethyl acetate = 20/1 v/v as the eluent) to yield the title compound as a white solid (m.p. 135 – 136 °C) with 75% yield. <sup>1</sup>H NMR (400 MHz, CDCl<sub>3</sub>) δ 7.66 (s, 1H), 7.56 (d, *J* = 8.8 Hz, 2H), 7.43 (d, *J* = 6.7 Hz, 2H), 7.40 – 7.30 (m, 3H), 7.33 – 7.23 (m, 2H), 6.98 (s, 1H), 6.80 (d, *J* = 1.4 Hz, 1H), 5.30 (s, 2H) ppm. <sup>13</sup>C{<sup>1</sup>H} NMR (100 MHz, CDCl<sub>3</sub>) δ 164.3, 138.8, 136.6, 132.9, 128.6, 128.2, 128.1, 124.4, 122.5, 120.5, 120.3, 118.3, 112.1, 65.8 ppm. IR: ν = 3138, 3032, 2919, 1709, 1544, 1506, 1401, 1361, 1258, 1223, 1135, 1076, 981, 934, 821, 757, 698, 594, 511 cm<sup>-1</sup>. HRMS (ESI): *m/z* calcd for C<sub>18</sub>H<sub>14</sub>BrNO<sub>2</sub>, [M + H]<sup>+</sup>: 356.0281, found: 356.0281.

### Benzyl 1-(4-(ethoxycarbonyl)phenyl)-1H-pyrrole-3-carboxylate (3j)

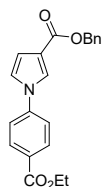

The crude mixture was purified by preparative TLC plate (petroleum ether/ethyl acetate = 10/1 v/v as the eluent) to yield the title compound as a white solid (m.p. 162 – 163 °C) with 71% yield. <sup>1</sup>H NMR (400 MHz, CDCl<sub>3</sub>) δ 8.13 (d, *J* = 8.6 Hz, 2H), 7.78 (t, *J* = 2.0 Hz, 1H), 7.50 – 7.38 (m, 4H), 7.43 – 7.29 (m, 3H), 7.09 (t, *J* = 2.7 Hz, 1H), 6.82 (dd, *J* = 3.0, 1.6 Hz, 1H), 5.32 (s, 2H), 4.40 (q, *J* = 7.1 Hz, 2H), 1.41 (t, *J* = 7.1 Hz, 3H) ppm. <sup>13</sup>C{<sup>1</sup>H} NMR (100 MHz, CDCl<sub>3</sub>) δ 165.7, 164.2, 143.0, 136.5, 131.4, 128.7, 128.6, 128.2, 128.1, 124.3, 120.3, 120.1, 118.7, 112.5, 65.8, 61.3, 14.3 ppm. IR: ν = 3132, 3030, 2953, 2904, 1984, 1750, 1602, 1551, 1510, 1458, 1410, 1364, 1258, 1221, 1230, 1133, 1081, 981, 908, 756, 698, 582, 548, 517 cm<sup>-1</sup>. HRMS (ESI): *m/z* calcd for C<sub>18</sub>H<sub>14</sub>BrNO<sub>2</sub>, [M + H]<sup>+</sup>: 356.0281, found: 356.0281.

### Benzyl 1-(3-methoxyphenyl)-1H-pyrrole-3-carboxylate (3k)

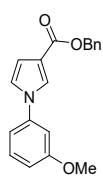

The crude mixture was purified by preparative TLC plate (petroleum ether/ethyl acetate = 20/1 v/v as the eluent) to yield the title compound as a yellow liquid with 85% yield. <sup>1</sup>H NMR (400 MHz, CDCl<sub>3</sub>) δ 7.71 (t, *J* = 2.0 Hz, 1H), 7.44 (d, *J* = 7.0 Hz, 2H), 7.36 (dt, *J* = 16.1, 7.3 Hz, 4H), 7.04 – 6.95 (m, 2H), 6.92 (t, *J* = 2.3 Hz, 1H), 6.86 (dd, *J* = 8.3, 2.4 Hz, 1H), 6.78 (dd, *J* = 3.1, 1.6 Hz, 1H), 5.31 (s, 2H), 3.85 (s, 3H) ppm. <sup>13</sup>C{<sup>1</sup>H} NMR (100 MHz, CDCl<sub>3</sub>) δ 164.5, 160.6, 141.0, 136.7, 130.6, 128.5, 128.1, 128.0, 124.6, 120.7, 117.8, 113.3, 112.3, 111.7, 107.2, 65.7, 55.5 ppm. IR: ν = 3137, 3032, 2928, 2849, 1710, 1608, 1543, 1508, 1455, 1362, 1314, 1268, 1210, 1177, 1132, 1051, 980, 960, 824, 757, 696, 590, 537, 456, cm<sup>-1</sup>. HRMS (ESI): *m/z* calcd for C<sub>19</sub>H<sub>17</sub>NO<sub>3</sub>, [M + H]<sup>+</sup>: 308.1281, found: 308.1280.

### Benzyl 1-(3-fluorophenyl)-1H-pyrrole-3-carboxylate (3l)

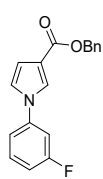

The crude mixture was purified by preparative TLC plate (petroleum ether/ethyl acetate = 20/1 v/v as the eluent) to yield the title compound as a yellow liquid with 74% yield. <sup>1</sup>H NMR (400 MHz, CDCl<sub>3</sub>) δ 7.70 (t, *J* = 2.0 Hz, 1H), 7.46 – 7.30 (m, 6H), 7.19 (dd, *J* = 8.1, 2.1 Hz, 1H), 7.12 (d, *J* = 9.7 Hz, 1H), 7.01 (dd, *J* = 5.2, 2.4 Hz, 2H), 6.80 (dd, *J* = 3.1, 1.6 Hz, 1H), 5.31 (s, 2H) ppm. <sup>13</sup>C{<sup>1</sup>H} NMR (100 MHz, CDCl<sub>3</sub>) δ 164.2, 163.2 (d, <sup>1</sup>*J*<sub>CF</sub> = 246.0 Hz), 141.1 (d, <sup>3</sup>*J*<sub>CF</sub> = 10.0 Hz), 136.5, 131.1 (d, <sup>3</sup>*J*<sub>CF</sub> = 9.0 Hz), 128.5, 128.1, 128.0, 124.3, 120.4, 118.3, 116.3 (d, <sup>4</sup>*J*<sub>CF</sub> = 3.0 Hz), 113.7 (d, <sup>2</sup>*J*<sub>CF</sub> = 20.0 Hz), 112.1, 108.4 (d, <sup>2</sup>*J*<sub>CF</sub> = 25.0 Hz), 65.7 ppm. <sup>19</sup>F NMR (376 MHz, CDCl<sub>3</sub>) δ -110.21 – -110.27 (m, 1F) ppm. IR: ν = 2917, 2853, 1700, 1544, 1516, 1450, 1400, 1360, 1256, 1223, 1130, 1076, 976, 840, 750, 690, 618, 452 cm<sup>-1</sup>. HRMS (ESI): *m/z* calcd for C<sub>18</sub>H<sub>14</sub>FNO<sub>2</sub>, [M + H]<sup>+</sup>: 296.1081, found: 296.1081.

### Benzyl 1-(3-chlorophenyl)-1H-pyrrole-3-carboxylate (3m)

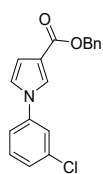

The crude mixture was purified by preparative TLC plate (petroleum ether/ethyl acetate = 20/1 v/v as the eluent) to yield the title compound as a yellow liquid with 71% yield. <sup>1</sup>H NMR (400 MHz, CDCl<sub>3</sub>) δ 7.61 (t, *J* = 2.0 Hz, 1H), 7.36 (d, *J* = 6.9 Hz, 2H), 7.34 – 7.24 (m, 5H), 7.20 (dt, *J* = 8.2, 2.2 Hz, 2H), 6.92 (t, *J* = 2.7 Hz, 1H), 6.72 (dd, *J* = 3.1, 1.6 Hz, 1H), 5.23 (s, 2H) ppm. <sup>13</sup>C{<sup>1</sup>H} NMR (100 MHz, CDCl<sub>3</sub>) δ 164.3, 140.8, 136.5, 135.5, 130.8, 128.6, 128.2, 128.1, 127.0, 124.4, 121.2, 120.5, 118.4, 119.0, 112.2, 65.8 ppm. IR: ν = 3138, 3033, 2917, 2850, 1710, 1596, 1545, 1503, 1454, 1400, 1361, 1310, 1266, 1223, 1138, 1079, 985, 781, 757, 698, 594, 440 cm<sup>-1</sup>. HRMS (ESI): *m/z* calcd for C<sub>18</sub>H<sub>14</sub>ClNO<sub>2</sub>, [M + H]<sup>+</sup>: 312.0786, found: 312.0786.

### Benzyl 1-(3-bromophenyl)-1H-pyrrole-3-carboxylate (3n)

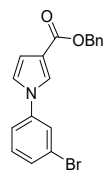

The crude mixture was purified by preparative TLC plate (petroleum ether/ethyl acetate = 20/1 v/v as the eluent) to yield the title compound as a white solid (m.p. 132 – 133 °C) with 76% yield. <sup>1</sup>H NMR (400 MHz, CDCl<sub>3</sub>) δ 7.68 (t, *J* = 1.9 Hz, 1H), 7.56 (d, *J* = 2.1 Hz, 1H), 7.47 – 7.42 (m, 3H), 7.41 – 7.35 (m, 2H), 7.35 – 7.29 (m, 3H), 7.00 (t, *J* = 2.7 Hz, 1H), 6.80 (dd, *J* = 3.1, 1.6 Hz, 1H), 5.31 (s, 2H) ppm. <sup>13</sup>C{<sup>1</sup>H} NMR (100 MHz, CDCl<sub>3</sub>) δ 164.2, 140.9, 136.5, 131.1, 129.9, 128.6, 128.2, 128.1, 124.4, 124.1, 123.3, 120.5, 119.5, 118.4, 112.2, 65.8 ppm. IR: ν = 3138, 3032, 2918, 2850, 1709, 1593, 1545, 1480, 1401, 1310, 1264, 1223, 1137,

1078, 991, 864, 756, 735, 698, 621, 533, 435  $\text{cm}^{-1}$ . HRMS (ESI):  $m/z$  calcd for  $\text{C}_{18}\text{H}_{14}\text{BrNO}_2$ ,  $[\text{M} + \text{H}]^+$ : 356.0281, found: 356.0281.

### Benzyl 1-(3-hydroxyphenyl)-1H-pyrrole-3-carboxylate (3o)

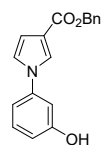

The crude mixture was purified by preparative TLC plate (petroleum ether/ethyl acetate = 5/1 v/v as the eluent) to yield the title compound as a white solid (m.p. 149 – 150 °C) with 70% yield.  $^1\text{H}$  NMR (400 MHz, DMSO- $d_6$ )  $\delta$  9.93 (s, 1H), 7.99 (t,  $J$  = 2.0 Hz, 1H), 7.53 – 7.27 (m, 7H), 7.12 (dd,  $J$  = 8.0, 2.2 Hz, 1H), 7.05 (t,  $J$  = 2.3 Hz, 1H), 6.81 (dd,  $J$  = 8.2, 2.3 Hz, 1H), 6.71 (t,  $J$  = 2.5 Hz, 1H), 5.32 (s, 2H) ppm.  $^{13}\text{C}\{^1\text{H}\}$  NMR (100 MHz, DMSO- $d_6$ )  $\delta$  164.0, 159.0, 140.6, 137.3, 131.1, 128.9, 128.3, 128.2, 124.6, 121.6, 117.3, 114.2, 111.5, 111.4, 107.9, 65.2 ppm. IR:  $\nu$  = 3350, 3110, 3030, 2953, 1789, 1606, 1546, 1510, 1459, 1412, 1360, 1260, 1207, 1130, 1053, 980, 908, 756, 693, 593, 548, 511  $\text{cm}^{-1}$ . HRMS (ESI):  $m/z$  calcd for  $\text{C}_{18}\text{H}_{15}\text{NO}_3$ ,  $[\text{M} + \text{H}]^+$ : 294.1125, found: 294.1125.

### Benzyl 1-(3-((tert-butoxycarbonyl)amino)phenyl)-1H-pyrrole-3-carboxylate (3p)

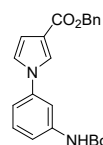

The crude mixture was purified by preparative TLC plate (petroleum ether/ethyl acetate = 2/1 v/v as the eluent) to yield the title compound as a white solid (m.p. 151 – 153 °C) with 68% yield.  $^1\text{H}$  NMR (400 MHz,  $\text{CDCl}_3$ )  $\delta$  7.73 – 7.64 (m, 2H), 7.47 – 7.26 (m, 6H), 7.14 (dd,  $J$  = 8.1, 2.1 Hz, 1H), 7.01 (d,  $J$  = 2.5 Hz, 2H), 6.84 (s, 1H), 6.79 – 6.73 (m, 1H), 5.30 (s, 2H), 1.51 (s, 9H) ppm.  $^{13}\text{C}\{^1\text{H}\}$  NMR (100 MHz,  $\text{CDCl}_3$ )  $\delta$  164.6, 152.6, 140.5, 140.0, 136.7, 130.1, 128.5, 128.1, 128.0, 124.7, 120.8, 117.7, 116.6, 115.2, 111.7, 111.1, 81.0, 65.7, 28.3 ppm. IR:  $\nu$  = 3400, 3140, 3015, 2950, 1780, 1603, 1537, 1519, 1501, 1450, 1400, 1365, 1258, 1223, 1130, 1071, 982, 908, 750, 694, 508  $\text{cm}^{-1}$ . HRMS (ESI):  $m/z$  calcd for  $\text{C}_{23}\text{H}_{24}\text{N}_2\text{O}_4$ ,  $[\text{M} + \text{H}]^+$ : 393.1809, found: 393.1807.

### Benzyl 1-(o-tolyl)-1H-pyrrole-3-carboxylate (3q)

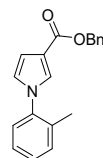

The crude mixture was purified by preparative TLC plate (petroleum ether/ethyl acetate = 20/1 v/v as the eluent) to yield the title compound as a yellow liquid with 75% yield.  $^1\text{H}$  NMR (400 MHz,  $\text{CDCl}_3$ )  $\delta$  7.47 – 7.41 (m, 3H), 7.36 (d,  $J$  = 7.6 Hz, 2H), 7.34 – 7.29 (m, 3H), 7.26 (d,  $J$  = 2.8 Hz, 1H), 7.23 (d,  $J$  = 1.5 Hz, 1H), 6.77 (dd,  $J$  = 2.9, 1.6 Hz, 1H), 6.75 – 6.67 (m, 1H), 5.30 (s, 2H), 2.19 (s, 3H) ppm.  $^{13}\text{C}\{^1\text{H}\}$  NMR (100 MHz,  $\text{CDCl}_3$ )  $\delta$  164.7, 139.5, 136.8, 133.8, 131.2, 128.5, 128.4, 128.1, 128.0, 127.3, 126.8, 126.5, 123.3, 116.6, 110.4, 65.6, 17.7 ppm. IR:  $\nu$  = 3132, 3032, 2919, 2851, 1710, 1539, 1507, 1456, 1361, 1253, 1217, 1196, 1137, 1115, 982, 759, 698, 640, 455  $\text{cm}^{-1}$ . HRMS (ESI):  $m/z$  calcd for  $\text{C}_{19}\text{H}_{17}\text{NO}_2$ ,  $[\text{M} + \text{H}]^+$ : 292.1332, found: 292.1331.

### Benzyl 1-(2-methoxyphenyl)-1H-pyrrole-3-carboxylate (3r)

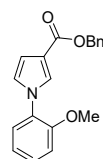

The crude mixture was purified by preparative TLC plate (petroleum ether/ethyl acetate = 20/1 v/v as the eluent) to yield the title compound as a yellow liquid with 72% yield.  $^1\text{H}$  NMR (400 MHz,  $\text{CDCl}_3$ )  $\delta$  7.62 (t,  $J$  = 2.0 Hz, 1H), 7.43 (d,  $J$  = 6.8 Hz, 2H), 7.39 – 7.24 (m, 5H), 7.05 – 6.96 (m, 2H), 6.90 (t,  $J$  = 2.6 Hz, 1H), 6.75 (dd,  $J$  = 3.2, 1.7 Hz, 1H), 5.30 (s, 2H), 3.82 (s, 3H) ppm.  $^{13}\text{C}\{^1\text{H}\}$  NMR (100 MHz,  $\text{CDCl}_3$ )  $\delta$  164.7, 152.8, 136.9, 129.2, 128.7, 128.5, 128.1, 127.9, 127.7, 125.9, 123.4, 121.0, 116.5, 112.4, 110.2, 65.5, 55.9 ppm. IR:  $\nu$  = 3396, 3032,

2939, 2840, 1708, 1541, 1514, 1463, 1361, 1324, 1265, 1216, 1135, 1024, 982, 755, 968, 634  $\text{cm}^{-1}$ . HRMS (ESI):  $m/z$  calcd for  $\text{C}_{19}\text{H}_{17}\text{NO}_3$ ,  $[\text{M} + \text{H}]^+$ : 308.1281, found: 308.1280.

### Benzyl 1-(2-chlorophenyl)-1H-pyrrole-3-carboxylate (3s)

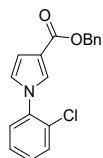

The crude mixture was purified by preparative TLC plate (petroleum ether/ethyl acetate = 20/1 v/v as the eluent) to yield the title compound as a yellow liquid with 63% yield.  $^1\text{H}$  NMR (400 MHz,  $\text{CDCl}_3$ )  $\delta$  7.54 (t,  $J = 1.9$  Hz, 2H), 7.44 (d,  $J = 6.7$  Hz, 2H), 7.40 – 7.31 (m, 6H), 6.84 (t,  $J = 2.6$  Hz, 1H), 6.79 (dd,  $J = 3.1, 1.6$  Hz, 1H), 5.31 (s, 2H) ppm.  $^{13}\text{C}\{^1\text{H}\}$  NMR (100 MHz,  $\text{CDCl}_3$ )  $\delta$  164.4, 137.8, 136.7, 130.8, 129.8, 129.3, 128.5, 128.1, 128.0, 127.8, 127.8, 127.4, 123.4, 117.2, 110.7, 65.6 ppm. IR:  $\nu = 2931, 2853, 1707, 1640, 1452, 1361, 1197, 1109, 1077, 990, 759, 743, 698, 459, 420$   $\text{cm}^{-1}$ . HRMS (ESI):  $m/z$  calcd for  $\text{C}_{18}\text{H}_{14}\text{ClNO}_2$ ,  $[\text{M} + \text{H}]^+$ : 312.0786, found: 312.0785.

### Benzyl 1-(2,3-dimethylphenyl)-1H-pyrrole-3-carboxylate (3t)

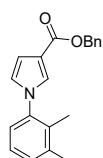

The crude mixture was purified by preparative TLC plate (petroleum ether/ethyl acetate = 20/1 v/v as the eluent) to yield the title compound as a colorless liquid with 78% yield.  $^1\text{H}$  NMR (400 MHz,  $\text{CDCl}_3$ )  $\delta$  7.47 – 7.35 (m, 3H), 7.39 – 7.27 (m, 3H), 7.25 – 7.05 (m, 3H), 6.76 (dd,  $J = 3.0, 1.6$  Hz, 1H), 6.69 (t,  $J = 2.6$  Hz, 1H), 5.30 (s, 2H), 2.34 (s, 3H), 2.03 (s, 3H) ppm.  $^{13}\text{C}\{^1\text{H}\}$  NMR (100 MHz,  $\text{CDCl}_3$ )  $\delta$  164.7, 139.6, 138.5, 136.8, 132.8, 130.0, 128.5, 128.1, 128.0, 127.6, 126.0, 124.3, 123.6, 116.4, 110.3, 65.5, 20.4, 14.2 ppm. IR:  $\nu = 2918, 2850, 1711, 1539, 1502, 1455, 1361, 1261, 1218, 1194, 1171, 1144, 1101, 989, 912, 760, 698, 647, 458, 421$   $\text{cm}^{-1}$ . HRMS (ESI):  $m/z$  calcd for  $\text{C}_{20}\text{H}_{19}\text{NO}_2$ ,  $[\text{M} + \text{H}]^+$ : 306.1489, found: 306.1488.

### Benzyl 1-(naphthalen-1-yl)-1H-pyrrole-3-carboxylate (3u)

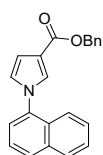

The crude mixture was purified by preparative TLC plate (petroleum ether/ethyl acetate = 15/1 v/v as the eluent) to yield the title compound as a colorless liquid with 80% yield.  $^1\text{H}$  NMR (400 MHz,  $\text{CDCl}_3$ )  $\delta$  7.91 (dd,  $J = 8.0, 4.8$  Hz, 2H), 7.68 – 7.60 (m, 2H), 7.59 – 7.27 (m, 9H), 6.89 (dt,  $J = 21.4, 2.5$  Hz, 2H), 5.33 (s, 2H) ppm.  $^{13}\text{C}\{^1\text{H}\}$  NMR (100 MHz,  $\text{CDCl}_3$ )  $\delta$  164.7, 137.0, 136.7, 134.2, 129.4, 128.9, 128.5, 128.3, 128.3, 128.1, 128.0, 127.5, 126.9, 125.2, 124.4, 123.5, 122.7, 116.9, 110.7, 65.6 ppm.  $\nu = 3132, 3060, 2950, 1709, 1540, 1499, 1411, 1378, 1267, 1181, 1141, 1101, 980, 803, 760, 698, 593, 522, 430$   $\text{cm}^{-1}$ . HRMS (ESI):  $m/z$  calcd for  $\text{C}_{22}\text{H}_{17}\text{NO}_2$ ,  $[\text{M} + \text{H}]^+$ : 328.1332, found: 328.1333.

### Benzyl 1-(3,5-dichlorophenyl)-1H-pyrrole-3-carboxylate (3v)

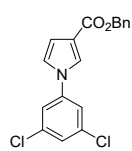

The crude mixture was purified by preparative TLC plate (petroleum ether/ethyl acetate = 10/1 v/v as the eluent) to yield the title compound as a white solid (m.p. 144 – 145  $^{\circ}\text{C}$ ) with 63% yield.  $^1\text{H}$  NMR (400 MHz,  $\text{CDCl}_3$ )  $\delta$  7.67 (t,  $J = 2.0$  Hz, 1H), 7.41 (d,  $J = 16.1$  Hz, 5H), 7.31 (s, 3H), 6.99 (t,  $J = 2.7$  Hz, 1H), 6.81 (dd,  $J = 3.1, 1.5$  Hz, 1H), 5.31 (s, 2H) ppm.  $^{13}\text{C}\{^1\text{H}\}$  NMR (100 MHz,  $\text{CDCl}_3$ )  $\delta$  164.0, 155.2, 141.3, 136.2, 128.6, 128.2, 128.1, 126.9, 124.2, 120.4, 119.4, 119.4, 112.6, 65.9 ppm. IR:  $\nu = 3137, 3030, 2917, 2851, 1711, 1599, 1550, 1509, 1454, 1400, 1360, 1310, 1267, 1223, 1140, 1078, 985, 781, 758, 699, 594, 445$   $\text{cm}^{-1}$ . HRMS (ESI):  $m/z$  calcd for  $\text{C}_{18}\text{H}_{13}\text{Cl}_2\text{NO}_2$ ,  $[\text{M} + \text{H}]^+$ : 346.0396, found: 346.0396.

### Benzyl 1-(3,4,5-trimethylphenyl)-1H-pyrrole-3-carboxylate (3w)

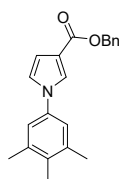

The crude mixture was purified by preparative TLC plate (petroleum ether/ethyl acetate = 20/1 v/v as the eluent) to yield the title compound as a colorless liquid with 90% yield. <sup>1</sup>H NMR (400 MHz, CDCl<sub>3</sub>) δ 7.66 (t, *J* = 1.9 Hz, 1H), 7.43 (s, 2H), 7.40 – 7.28 (m, 3H), 7.04 (s, 2H), 6.97 (t, *J* = 2.7 Hz, 1H), 6.76 (dd, *J* = 3.0, 1.7 Hz, 1H), 5.30 (s, 2H), 2.33 (s, 6H), 2.19 (s, 3H) ppm. <sup>13</sup>C{<sup>1</sup>H} NMR (100 MHz, CDCl<sub>3</sub>) δ 164.6, 138.0, 137.1, 136.8, 134.0, 128.5, 128.1, 128.0, 124.7, 120.7, 120.1, 117.2, 111.3, 65.6, 20.7, 15.1 ppm. IR: ν = 2918, 2851, 1710, 1541, 1501, 1453, 1364, 1282, 1213, 1127, 1078, 979, 817, 758, 698, 633 cm<sup>-1</sup>. HRMS (ESI): *m/z* calcd for C<sub>21</sub>H<sub>21</sub>NO<sub>2</sub>, [M + H]<sup>+</sup>: 320.1645, found: 320.1644.

### Benzyl 1-(3,4,5-trimethoxyphenyl)-1H-pyrrole-3-carboxylate (3x)

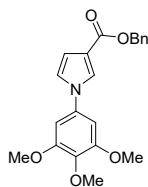

The crude mixture was purified by preparative TLC plate (petroleum ether/ethyl acetate = 15/1 v/v as the eluent) to yield the title compound as a colorless liquid with 92% yield. <sup>1</sup>H NMR (400 MHz, CDCl<sub>3</sub>) δ 7.65 (t, *J* = 2.0 Hz, 1H), 7.48 – 7.29 (m, 5H), 6.96 (t, *J* = 2.6 Hz, 1H), 6.78 (dd, *J* = 3.1, 1.7 Hz, 1H), 6.59 (s, 2H), 5.32 (s, 2H), 3.90 (s, 6H), 3.87 (s, 3H) ppm. <sup>13</sup>C{<sup>1</sup>H} NMR (100 MHz, CDCl<sub>3</sub>) δ 164.5, 153.9, 136.6, 136.1, 128.5, 128.2, 128.1, 125.0, 121.1, 117.6, 111.6, 102.2, 99.2, 65.7, 61.0, 56.4 ppm. IR: ν = 2918, 2849, 1709, 1600, 1542, 1512, 1466, 1426, 1313, 1242, 1211, 1129, 1079, 1004, 835, 817, 759, 699 cm<sup>-1</sup>. HRMS (ESI): *m/z* calcd for C<sub>21</sub>H<sub>21</sub>NO<sub>5</sub>, [M + H]<sup>+</sup>: 368.1492, found: 368.1492.

### Benzyl 1-(1H-indol-4-yl)-1H-pyrrole-3-carboxylate (3y)

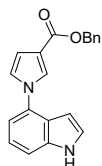

The crude mixture was purified by preparative TLC plate (petroleum ether/ethyl acetate = 20/1 v/v as the eluent) to yield the title compound as a colorless liquid with 75% yield. <sup>1</sup>H NMR (400 MHz, CDCl<sub>3</sub>) δ 8.64 (s, 1H), 7.81 (d, *J* = 1.9 Hz, 1H), 7.45 (d, *J* = 7.3 Hz, 2H), 7.41 – 7.28 (m, 4H), 7.28 – 7.16 (m, 2H), 7.12 (t, *J* = 2.6 Hz, 1H), 7.07 (d, *J* = 7.4 Hz, 1H), 6.87 – 6.81 (m, 1H), 6.63 (t, *J* = 2.6 Hz, 1H), 5.34 (s, 2H) ppm. <sup>13</sup>C{<sup>1</sup>H} NMR (100 MHz, CDCl<sub>3</sub>) δ 164.9, 137.3, 136.8, 132.7, 128.5, 128.0, 127.9, 126.5, 125.4, 122.5, 122.3, 122.1, 116.8, 113.9, 110.8, 110.6, 100.3, 65.6 ppm. IR: ν = 3395, 2918, 2850, 1691, 182, 1540, 1513, 1411, 1344, 1253, 1215, 1174, 1146, 1215, 1174, 1146, 1119, 1081, 981, 749, 697, 638, 471 cm<sup>-1</sup>. HRMS (ESI): *m/z* calcd for C<sub>20</sub>H<sub>16</sub>N<sub>2</sub>O<sub>2</sub>, [M + H]<sup>+</sup>: 317.1285, found: 317.1284.

### Benzyl 1-benzyl-1H-pyrrole-3-carboxylate (3z)

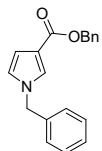

The crude mixture was purified by preparative TLC plate (petroleum ether/ethyl acetate = 15/1 v/v as the eluent) to yield the title compound as a colorless liquid with 63% yield. <sup>1</sup>H NMR (400 MHz, CDCl<sub>3</sub>) δ 7.41 (d, *J* = 7.0 Hz, 2H), 7.40 – 7.28 (m, 7H), 7.16 – 7.10 (m, 2H), 6.63 (dt, *J* = 12.6, 2.8 Hz, 2H), 5.26 (s, 2H), 5.05 (s, 2H) ppm. <sup>13</sup>C{<sup>1</sup>H} NMR (100 MHz, CDCl<sub>3</sub>) δ 164.6, 136.8, 136.6, 128.9, 128.7, 128.5, 128.3, 128.3, 128.2, 128.1, 127.9, 127.3, 127.0, 126.6, 122.2, 110.6, 65.5, 53.9 ppm. IR: ν = 3031, 2955, 1777, 1600, 1549, 1501, 1450, 1410, 1362, 1255, 1200, 1132, 1081, 999, 900, 756, 675, 601 cm<sup>-1</sup>. HRMS (ESI): *m/z* calcd for C<sub>19</sub>H<sub>17</sub>NO<sub>2</sub>, [M + Na]<sup>+</sup>: 292.1332, found: 292.1335.



### Benzyl 1-butyl-1H-pyrrole-3-carboxylate (3aa)

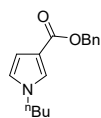

The crude mixture was purified by preparative TLC plate (petroleum ether/ethyl acetate = 15/1 v/v as the eluent) to yield the title compound as a colorless liquid with 75% yield. <sup>1</sup>H NMR (400 MHz, CDCl<sub>3</sub>) δ 7.45 – 7.29 (m, 6H), 6.59 (dt, *J* = 9.3, 2.6 Hz, 2H), 5.27 (s, 2H), 3.86 (t, *J* = 7.1 Hz, 2H), 1.75 (p, *J* = 7.2 Hz, 2H), 1.30 (q, *J* = 7.5 Hz, 2H), 0.93 (t, *J* = 7.4 Hz, 3H) ppm. <sup>13</sup>C{<sup>1</sup>H} NMR (100 MHz, CDCl<sub>3</sub>) δ 164.7, 136.9, 128.5, 128.0, 127.9, 126.1, 121.6, 110.1, 65.4, 49.9, 33.2, 19.8, 13.6 ppm. IR: ν = 2958, 2930, 2873, 1707, 1539, 1456, 1353, 1210, 1190, 1109, 1075, 986, 760, 698 cm<sup>-1</sup>. HRMS (ESI): *m/z* calcd for C<sub>16</sub>H<sub>19</sub>NO<sub>2</sub>, [M + H]<sup>+</sup>: 258.1489, found: 258.1489.

### Benzyl 1-pentyl-1H-pyrrole-3-carboxylate (3ab)

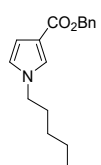

The crude mixture was purified by preparative TLC plate (petroleum ether/ethyl acetate = 15/1 v/v as the eluent) to yield the title compound as a colorless liquid with 69% yield. <sup>1</sup>H NMR (400 MHz, CDCl<sub>3</sub>) δ 7.31 (d, 1H), 6.59 (dt, *J* = 9.3, 2.6 Hz, 5H), 5.27 (s, 2H), 3.86 (t, *J* = 7.1 Hz, 2H), 1.80-1.69 (m, 2H), 1.26 (m, 4H), 0.93 (t, *J* = 7.4 Hz, 3H) ppm. <sup>13</sup>C{<sup>1</sup>H} NMR (100 MHz, CDCl<sub>3</sub>) δ 164.7, 136.8, 128.4, 128.0, 127.89, 126.1, 121.6, 110.01, 65.4, 49.8, 33.2, 29.7, 19.8, 13.6 ppm. IR: ν = 2959, 2936, 2877, 2865, 1710, 1539, 1456, 1353, 1218, 1192, 1110, 1079, 988, 760, 698 cm<sup>-1</sup>. HRMS (ESI): *m/z* calcd for C<sub>17</sub>H<sub>21</sub>NO<sub>2</sub>, [M + H]<sup>+</sup>: 272.1645, found: 272.1644.

### Benzyl 1-dodecyl-1H-pyrrole-3-carboxylate (3ac)

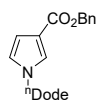

The crude mixture was purified by preparative TLC plate (petroleum ether/ethyl acetate = 15/1 v/v as the eluent) to yield the title compound as a colorless liquid with 66% yield. <sup>1</sup>H NMR (400 MHz, CDCl<sub>3</sub>) δ 7.45 – 7.27 (m, 6H), 6.59 (dt, *J* = 8.8, 2.6 Hz, 2H), 5.27 (s, 2H), 3.85 (t, *J* = 7.2 Hz, 2H), 3.13 (qd, *J* = 7.3, 4.4 Hz, 6H), 1.41 (t, *J* = 7.3 Hz, 10H), 0.88 (t, *J* = 6.7 Hz, 7H) ppm. <sup>13</sup>C{<sup>1</sup>H} NMR (100 MHz, CDCl<sub>3</sub>) δ 164.7, 136.9, 128.5, 128.0, 127.9, 126.1, 121.6, 110.1, 65.3, 50.2, 45.9, 31.9, 31.2, 29.6, 29.4, 29.3, 29.1, 26.6, 22.7, 14.1, 8.61 ppm. IR: ν = 3033, 2925, 2853, 1710, 1539, 1457, 1354, 1208, 1190, 1108, 983, 813, 759, 697, 597 cm<sup>-1</sup>. HRMS (ESI): *m/z* calcd for C<sub>24</sub>H<sub>35</sub>NO<sub>2</sub>, [M + H]<sup>+</sup>: 370.2741, found: 370.2741.

### Benzyl 1-hexadecyl-1H-pyrrole-3-carboxylate (3ad)

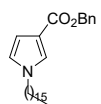

The crude mixture was purified by preparative TLC plate (petroleum ether/ethyl acetate = 15/1 v/v as the eluent) to yield the title compound as a colorless liquid with 60% yield. <sup>1</sup>H NMR (400 MHz, CDCl<sub>3</sub>) δ 7.45 – 7.27 (m, 12H), 6.59 (dt, *J* = 8.8, 2.6 Hz, 2H), 5.27 (s, 2H), 3.85 (t, *J* = 7.2 Hz, 2H), 3.13 (qd, *J* = 7.3, 4.4 Hz, 6H), 1.41 (t, *J* = 7.3 Hz, 10H), 0.88 (t, *J* = 6.7 Hz, 7H) ppm. <sup>13</sup>C{<sup>1</sup>H} NMR (100 MHz, CDCl<sub>3</sub>) δ 164.7, 136.9, 128.5, 128.0, 127.9, 126.1, 121.6, 115.4, 110.1, 65.3, 50.2, 46.0, 31.9, 31.2, 29.7, 29.7, 29.6, 29.6, 29.4, 29.4, 29.1, 26.6, 22.7, 14.1, 8.6 ppm. IR: ν = 3030, 2930, 2850, 1719, 1539, 1460, 1355, 1208, 1191, 1112, 980, 815, 762, 700, 599, 427 cm<sup>-1</sup>. HRMS (ESI): *m/z* calcd for C<sub>28</sub>H<sub>43</sub>NO<sub>2</sub>, [M + H]<sup>+</sup>: 426.3367, found: 426.3367.

### Benzyl 1-cyclohexyl-1H-pyrrole-3-carboxylate (3ae)

The crude mixture was purified by preparative TLC plate (petroleum ether/ethyl acetate = 15/1 v/v as the eluent) to yield the title compound as a colorless liquid with 76% yield. <sup>1</sup>H NMR (400 MHz, CDCl<sub>3</sub>)

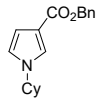
 $\delta$  7.44 – 7.30 (m, 6H), 6.63 (dt,  $J = 23.8, 2.6$  Hz, 2H), 5.26 (s, 2H), 3.79 (ddt,  $J = 11.8, 7.7, 3.8$  Hz, 1H), 3.13 (q,  $J = 7.4$  Hz, 4H), 2.12 – 2.03 (m, 2H), 1.89 (dt,  $J = 13.5, 3.3$  Hz, 2H), 1.60 (qd,  $J = 12.5, 3.4$  Hz, 2H), 1.41 (t,  $J = 7.3$  Hz, 2H) ppm.  $^{13}\text{C}\{^1\text{H}\}$  NMR (100 MHz,  $\text{CDCl}_3$ )  $\delta$  164.79, 128.44, 128.03, 127.86, 124.11, 119.84, 109.67, 107.53, 103.39, 65.30, 59.29, 45.92, 34.41, 25.52, 25.29, 8.61 ppm. IR:  $\nu = 2931, 2853, 1701, 1640, 1540, 1452, 1361, 1179, 1077, 990, 759, 698, 459, 420$   $\text{cm}^{-1}$ . HRMS (ESI):  $m/z$  calcd for  $\text{C}_{18}\text{H}_{21}\text{NO}_2$ ,  $[\text{M} + \text{H}]^+$ : 284.1645, found: 284.1645.

#### Benzyl 1-(tert-butyl)-1H-pyrrole-3-carboxylate (3af)

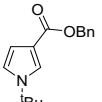
 The crude mixture was purified by preparative TLC plate (petroleum ether/ethyl acetate = 15/1 v/v as the eluent) to yield the title compound as a colorless liquid with 74% yield.  $^1\text{H}$  NMR (400 MHz,  $\text{CDCl}_3$ )  $\delta$  7.49 (s, 1H), 7.42 (s, 2H), 7.37 (s, 3H), 6.79 (t,  $J = 2.7$  Hz, 1H), 6.63 (dd,  $J = 3.1, 1.7$  Hz, 1H), 5.27 (s, 2H), 1.53 (s, 9H) ppm.  $^{13}\text{C}\{^1\text{H}\}$  NMR (100 MHz,  $\text{CDCl}_3$ )  $\delta$  164.9, 128.5, 128.1, 127.9, 123.5, 118.8, 114.9, 109.8, 65.3, 55.8, 30.6 ppm. IR:  $\nu = 2977, 2918, 2850, 1707, 1537, 1460, 1374, 1330, 1226, 1210, 1161, 1101, 993, 759, 698, 642$   $\text{cm}^{-1}$ . HRMS (ESI):  $m/z$  calcd for  $\text{C}_{16}\text{H}_{19}\text{NO}_2$ ,  $[\text{M} + \text{H}]^+$ : 258.1489, found: 258.1489.

#### Benzyl 1-(3-(1H-indol-3-yl)-1-methoxy-1-oxopropan-2-yl)-1H-pyrrole-3-carboxylate (3ag)

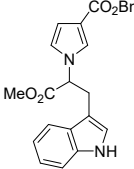
 The crude mixture was purified by preparative TLC plate (petroleum ether/ethyl acetate = 5/1 v/v as the eluent) to yield the title compound as a colorless liquid with 59% yield.  $^1\text{H}$  NMR (400 MHz,  $\text{CDCl}_3$ )  $\delta$  8.07 (s, 1H), 7.56 (d,  $J = 7.9$  Hz, 1H), 7.32 (m,  $J = 4.4$  Hz, 5H), 7.17 (t,  $J = 7.5$  Hz, 2H), 7.09 (t,  $J = 7.4$  Hz, 2H), 7.03 (s, 1H), 6.71 (d,  $J = 6.0$  Hz, 1H), 5.10 – 4.99 (m, 1H), 4.91 (s, 1H), 3.66 (s, 3H), 3.27 (d,  $J = 7.6$  Hz, 2H) ppm.  $^{13}\text{C}\{^1\text{H}\}$  NMR (100 MHz,  $\text{CDCl}_3$ )  $\delta$  174.8, 166.3, 139.7, 136.3, 135.7, 133.6, 128.6, 128.5, 128.3, 128.2, 128.08, 127.3, 123.1, 122.1, 119.5, 118.7, 111.2, 99.1, 66.6, 60.6, 43.6, 29.1 ppm. IR:  $\nu = 3345, 3284, 3067, 2954, 2923, 2850, 2755, 2613, 1691, 1590, 1540, 1513, 1400, 1340, 1253, 1218, 1174, 1215, 1121, 1081, 945, 860, 749, 722, 669$   $\text{cm}^{-1}$ . HRMS (ESI):  $m/z$  calcd for  $\text{C}_{24}\text{H}_{22}\text{N}_2\text{O}_4$ ,  $[\text{M} + \text{H}]^+$ : 403.1652, found: 403.1653.

#### Ethyl 1-phenyl-1H-pyrrole-3-carboxylate (3ah)

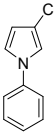
 The crude mixture was purified by preparative TLC plate (petroleum ether/ethyl acetate = 20/1 v/v as the eluent) to yield the title compound as a colorless liquid with 87% yield.  $^1\text{H}$  NMR (400 MHz,  $\text{CDCl}_3$ )  $\delta$  7.62 (t,  $J = 2.0$  Hz, 1H), 7.40 – 7.30 (m, 4H), 7.24 (s, 1H), 6.95 (t,  $J = 2.7$  Hz, 1H), 6.69 (dd,  $J = 2.9, 1.6$  Hz, 1H), 4.24 (q,  $J = 7.2$  Hz, 2H), 1.29 (t,  $J = 7.2$  Hz, 3H) ppm.  $^{13}\text{C}\{^1\text{H}\}$  NMR (100 MHz,  $\text{CDCl}_3$ )  $\delta$  164.8, 139.9, 129.8, 126.8, 124.3, 121.0, 120.5, 118.3, 111.6, 59.9, 14.5 ppm. IR:  $\nu = 3008, 2989, 1712, 1535, 1452, 1381, 1221, 1188, 1110, 1032, 998, 820, 763, 710, 656, 477$   $\text{cm}^{-1}$ . HRMS (ESI):  $m/z$  calcd for  $\text{C}_{13}\text{H}_{13}\text{NO}_2$ ,  $[\text{M} + \text{H}]^+$ : 216.1019, found: 216.1019.

#### Ethyl 1-benzyl-1H-pyrrole-3-carboxylate (3ai)

The crude mixture was purified by preparative TLC plate (petroleum ether/ethyl acetate = 20/1 v/v as the eluent) to yield the title compound as a colorless liquid with 79% yield.  $^1\text{H}$  NMR (400 MHz,  $\text{CDCl}_3$ )

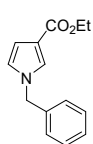

$\delta$  7.38 – 7.25 (m, 4H), 7.16 – 7.10 (m, 2H), 6.61 (d,  $J = 2.0$  Hz, 2H), 5.03 (s, 2H), 4.25 (q,  $J = 7.1$  Hz, 2H), 1.31 (t,  $J = 7.1$  Hz, 3H) ppm.  $^{13}\text{C}\{^1\text{H}\}$  NMR (100 MHz,  $\text{CDCl}_3$ )  $\delta$  164.9, 136.8, 128.9, 128.1, 127.3, 126.3, 122.1, 116.6, 110.5, 59.7, 53.8, 14.5 ppm. IR:  $\nu = 3128, 2980, 1704, 1541, 1450, 1373, 1220, 1188, 1113, 1025, 965, 819, 763, 712, 629, 461$   $\text{cm}^{-1}$ .

HRMS (ESI):  $m/z$  calcd for  $\text{C}_{14}\text{H}_{15}\text{NO}_2$ ,  $[\text{M} + \text{H}]^+$ : 230.1181, found: 230.1175.

### (1-(3,5-Difluoro-4-methoxyphenyl)-1H-pyrrol-3-yl)(phenyl)methanone (3aj)

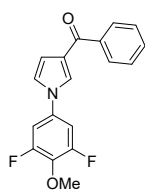

The crude mixture was purified by preparative TLC plate (petroleum ether/ethyl acetate = 15/1 v/v as the eluent) to yield the title compound as a yellow solid (m.p. 166 – 167 °C) with 81% yield.  $^1\text{H}$  NMR (400 MHz,  $\text{CDCl}_3$ )  $\delta$  7.89 – 7.83 (m, 2H), 7.57 (t,  $J = 7.4$  Hz, 1H), 7.53 – 7.45 (m, 3H), 7.07 – 6.95 (m, 3H), 6.87 (dd,  $J = 3.1, 1.7$  Hz, 1H), 4.03 (s, 3H) ppm.  $^{13}\text{C}\{^1\text{H}\}$  NMR (100 MHz,  $\text{CDCl}_3$ )  $\delta$  190.5, 156.0 (dd,  $^1J_{\text{CF}} = 248.0$  Hz,  $^3J_{\text{CF}} = 8.0$  Hz), 139.4, 135.4 (t,  $^3J_{\text{CF}} = 14.0$  Hz), 134.4 (t,  $^2J_{\text{CF}} = 12.0$  Hz), 131.8, 128.9, 128.3, 126.7, 125.7, 121.0, 112.9, 105.6 (dd,  $^2J_{\text{CF}} = 18.0$  Hz,  $^4J_{\text{CF}} = 9.0$  Hz), 62.1 ppm.  $^{19}\text{F}$  NMR (376 MHz,  $\text{CDCl}_3$ )  $\delta$  -125.34 (d,  $J_{\text{F-H}} = 7.5$  Hz, 2F) ppm. IR:  $\nu = 2995, 2851, 1700, 1544, 1516, 1450, 1400, 1360, 1260, 1240, 1220, 1133, 1077, 1037, 978, 840, 750, 690, 618$   $\text{cm}^{-1}$ . HRMS (ESI):  $m/z$  calcd for  $\text{C}_{18}\text{H}_{13}\text{F}_2\text{NO}_2$ ,  $[\text{M} + \text{H}]^+$ : 314.0987, found: 314.0987.

### Phenyl(1-phenyl-1H-pyrrol-3-yl)methanone<sup>1</sup> (3ak)

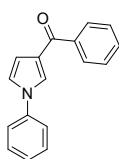

The crude mixture was purified by preparative TLC plate (petroleum ether/ethyl acetate = 15/1 v/v as the eluent) to yield the title compound as a colorless liquid with 77% yield.

$^1\text{H}$  NMR (400 MHz,  $\text{CDCl}_3$ )  $\delta$  7.88 (d,  $J = 7.7$  Hz, 2H), 7.61 (s, 1H), 7.55 (t,  $J = 7.4$  Hz, 1H), 7.49 (d,  $J = 7.4$  Hz, 2H), 7.46 (d,  $J = 7.2$  Hz, 2H), 7.42 (d,  $J = 7.5$  Hz, 2H), 7.34 (t,  $J = 7.2$  Hz, 1H), 7.11 (d,  $J = 2.1$  Hz, 1H), 6.88 (s, 1H), ppm.  $^{13}\text{C}\{^1\text{H}\}$  NMR (100 MHz,  $\text{CDCl}_3$ )  $\delta$  190.8, 139.8, 139.8, 131.6, 129.8, 129.0, 128.3, 127.1, 126.2, 126.2, 121.2, 121.2, 112.4 ppm.

### Naphthalen-1-yl(1-pentyl-1H-pyrrol-3-yl)methanone<sup>2</sup> (JWH-030)

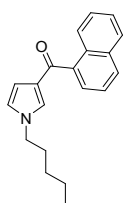

The crude mixture was purified by preparative TLC plate (petroleum ether/ethyl acetate = 15/1 v/v as the eluent) to yield the title compound as a colorless liquid with 77% yield.

$^1\text{H}$  NMR (400 MHz,  $\text{CDCl}_3$ )  $\delta$  8.21 – 8.13 (m, 1H), 7.97 – 7.85 (m, 2H), 7.65 (d,  $J = 7.0$  Hz, 1H), 7.57 – 7.44 (m, 3H), 7.07 (d,  $J = 1.9$  Hz, 1H), 6.68 (dt,  $J = 10.4, 2.7$  Hz, 2H), 3.84 (t,  $J = 7.2$  Hz, 2H), 1.75 (p,  $J = 7.3$  Hz, 2H), 1.41 – 1.29 (m, 4H), 0.87 (q,  $J = 13.8, 10.3$  Hz, 3H) ppm.  $^{13}\text{C}\{^1\text{H}\}$  NMR (100 MHz,  $\text{CDCl}_3$ )  $\delta$  192.1, 143.4, 138.5, 130.7, 130.1, 128.7, 128.1, 126.7, 126.3, 126.2, 126.0, 126.0, 124.4, 122.5, 110.6, 50.2, 30.8, 29.7, 28.7, 22.2, 13.9 ppm.

### (1-(3,5-Difluoro-4-hydroxyphenyl)-1H-pyrrol-3-yl)(phenyl)methanone<sup>3</sup> (4a)

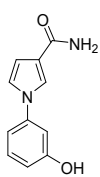

The crude mixture was purified by preparative TLC plate (petroleum ether/ethyl acetate = 5/1 v/v as the eluent) to yield the title compound as a yellow solid (m.p. 184 – 185 °C) with 82% yield.

$^1\text{H}$  NMR (400 MHz, DMSO)  $\delta$  9.91 (s, 1H), 7.80 (s, 1H), 7.44 (s, 1H), 7.27 (s, 1H), 6.99 (d,  $J = 8.0$  Hz, 1H), 6.90 (d,  $J = 14.3$  Hz, 2H), 6.72 (d,  $J = 7.9$  Hz, 1H), 6.63 (s, 1H) ppm.  $^{13}\text{C}\{^1\text{H}\}$   $^{13}\text{C}$  NMR (101 MHz, DMSO)  $\delta$  165.6, 159.01, 141.0, 131.1, 122.3, 121.7, 120.3, 113.7, 110.9, 110.7, 107.3 ppm.

### 1-(3-Hydroxyphenyl)-1*H*-pyrrole-3-carboxamide<sup>4</sup> (JMC-2004)

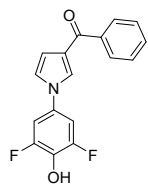

The crude mixture was purified by preparative TLC plate (petroleum ether/ethyl acetate = 5/1 v/v as the eluent) to yield the title compound as a colorless liquid with 87% yield. <sup>1</sup>H NMR (400 MHz, DMSO-*d*<sub>6</sub>) δ 10.44 (br s, 1H), 7.92 – 7.94 (m, 1H), 7.84 (d, *J* = 4.0 Hz, 2H), 7.59 – 7.64 (m, 2H), 7.51 – 7.55 (m, 3H), 6.72 – 6.74 (m, 1H), 6.56 (s, 1H) ppm. <sup>13</sup>C{<sup>1</sup>H} NMR (100 MHz, DMSO-*d*<sub>6</sub>) δ 189.1, 152.4 (dd, <sup>1</sup>*J*<sub>C-F</sub> = 241.0 Hz, <sup>3</sup>*J*<sub>CF</sub> = 9.0 Hz), 139.1, 132.4 (t, <sup>3</sup>*J*<sub>C-F</sub> = 16.0 Hz), 131.8, 130.0 (t, <sup>3</sup>*J*<sub>C-F</sub> = 12.0 Hz), 128.7, 128.5, 125.9, 125.2, 121.6, 111.7, 104.8 (dd, <sup>2</sup>*J*<sub>CF</sub> = 18.0 Hz, <sup>4</sup>*J*<sub>CF</sub> = 10.0 Hz) ppm. <sup>19</sup>F NMR (376 MHz, DMSO-*d*<sub>6</sub>) δ -130.39 (d, *J*<sub>F-H</sub> = 7.5 Hz, 2F) ppm.

### Ethyl 1-benzyl-1*H*-indole-3-carboxylate (5a)

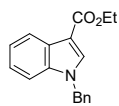

The crude mixture was purified by preparative TLC plate (petroleum ether/ethyl acetate = 15/1 v/v as the eluent) to yield the title compound as a colorless liquid with 81% yield. <sup>1</sup>H NMR (400 MHz, CDCl<sub>3</sub>) δ 8.24 – 8.17 (m, 1H), 7.86 (s, 1H), 7.35 – 7.20 (m, 6H), 7.18 – 7.12 (m, 2H), 5.34 (s, 2H), 4.41 (s, 2H), 1.42 (t, *J* = 7.1 Hz, 3H) ppm. <sup>13</sup>C{<sup>1</sup>H} NMR (100 MHz, CDCl<sub>3</sub>) δ 165.2, 136.8, 136.0, 134.6, 129.0, 128.1, 127.0, 126.8, 122.9, 122.0, 121.8, 110.3, 107.9, 59.8, 50.7, 14.6 ppm.

## 12. $^1\text{H}$ NMR and $^{13}\text{C}$ NMR spectra of products

### Benzyl 3-hydroxy-4,4-dimethoxy-2-methylenebutanoate (1a)

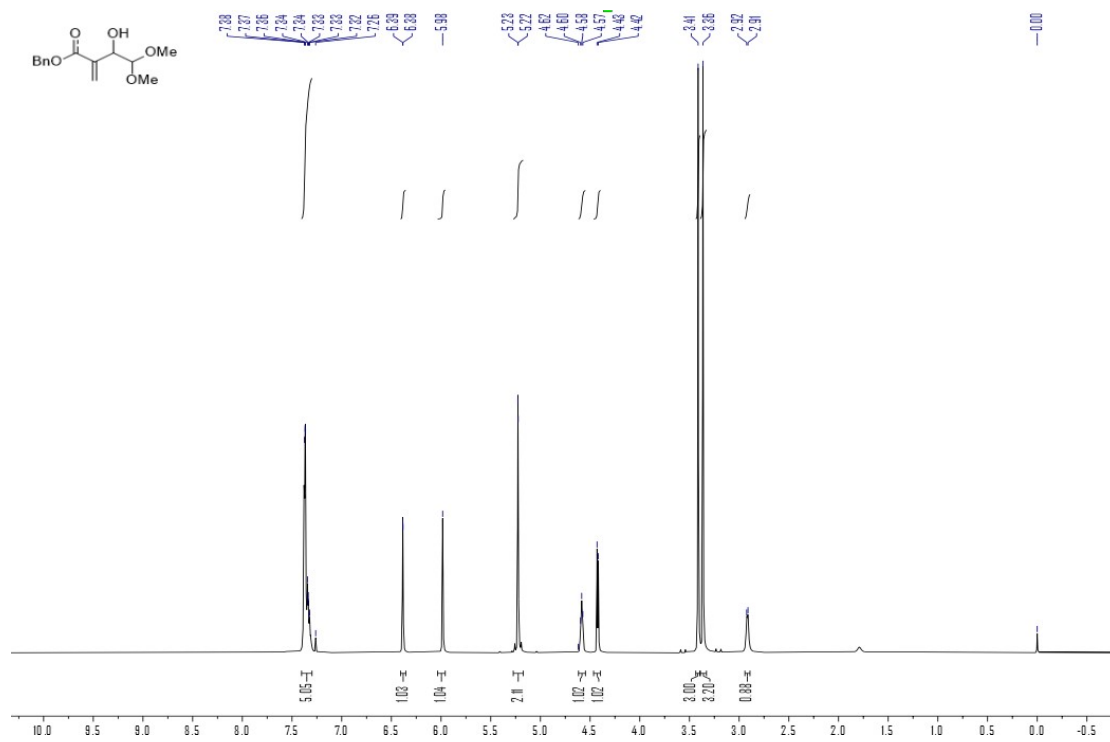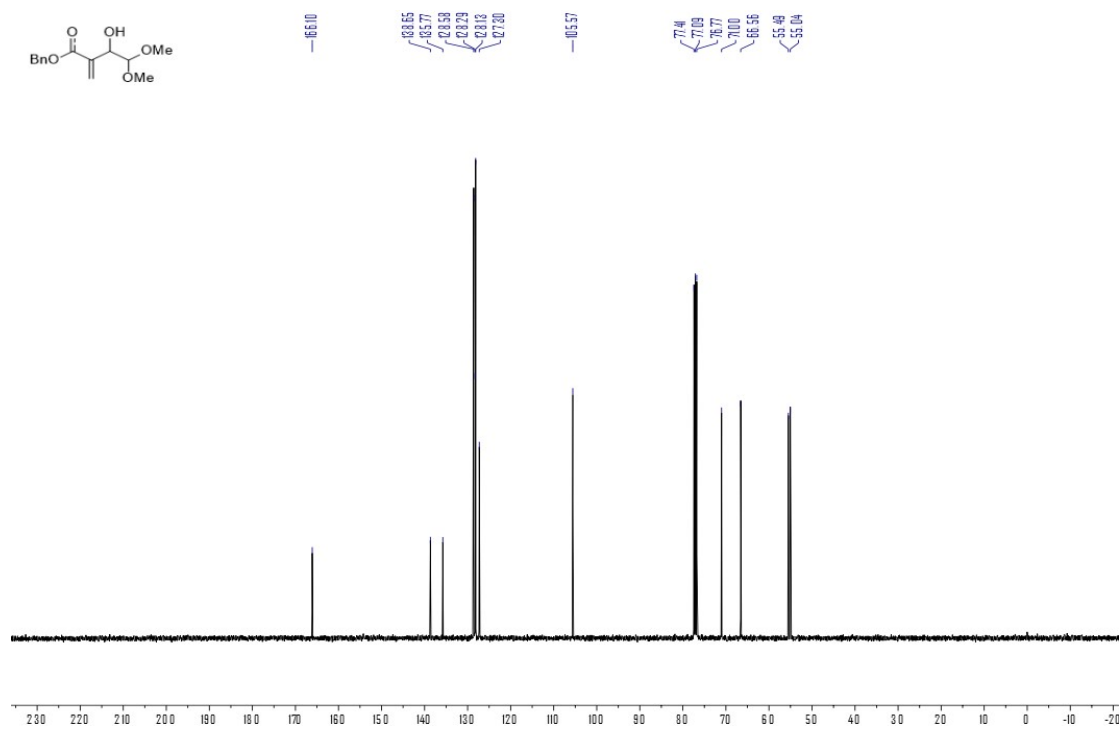

**Benzyl 3-acetoxy-4,4-dimethoxy-2-methylenebutanoate (1b)**

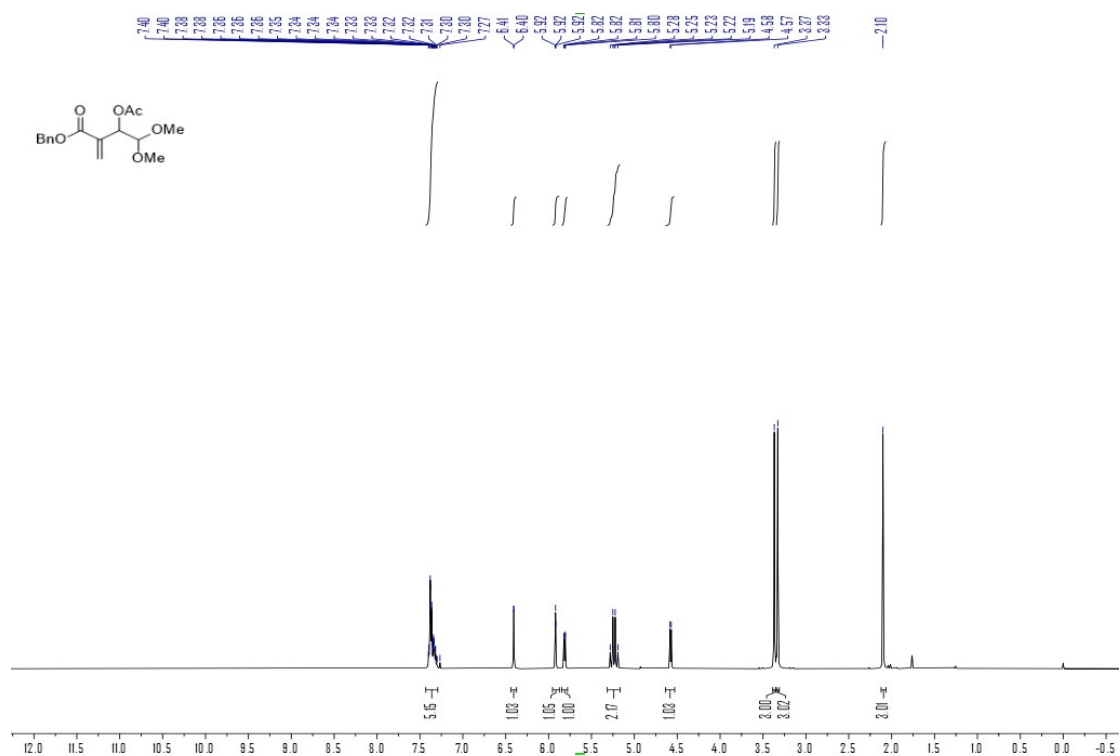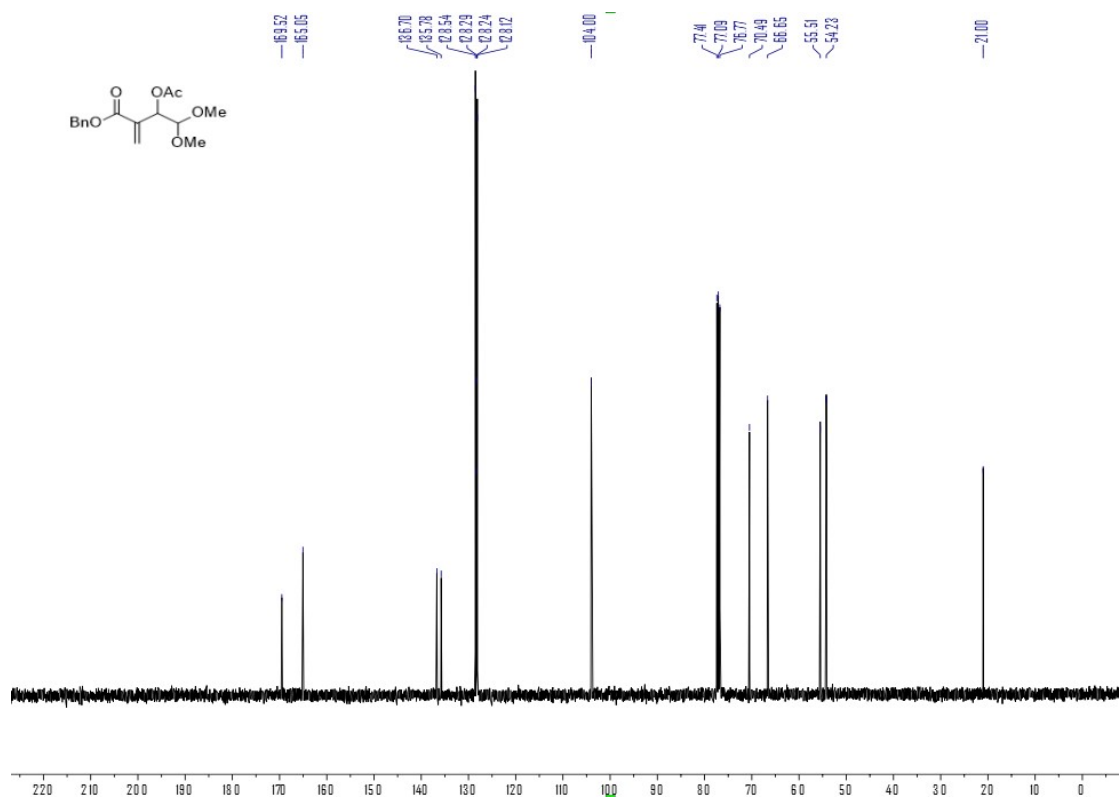

Ethyl 3-hydroxy-4,4-dimethoxy-2-methylenebutanoate

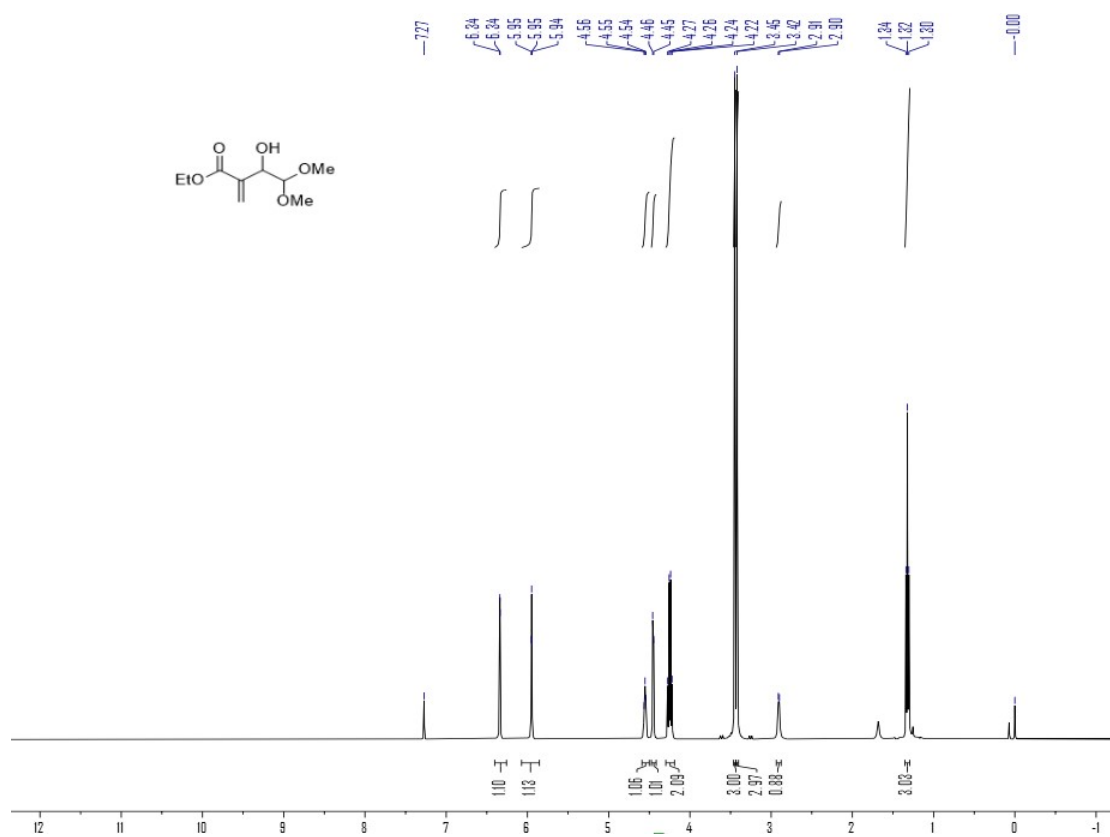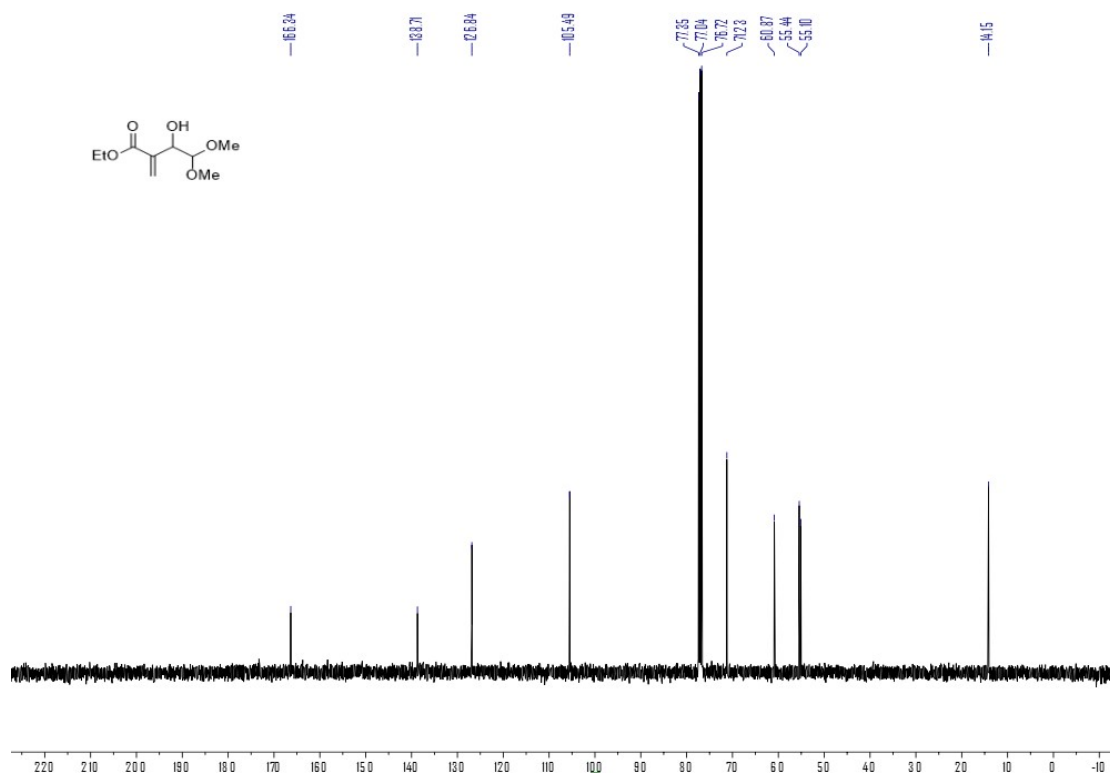

3-Benzoyl-1,1-dimethoxybut-3-en-2-yl acetate (1c)

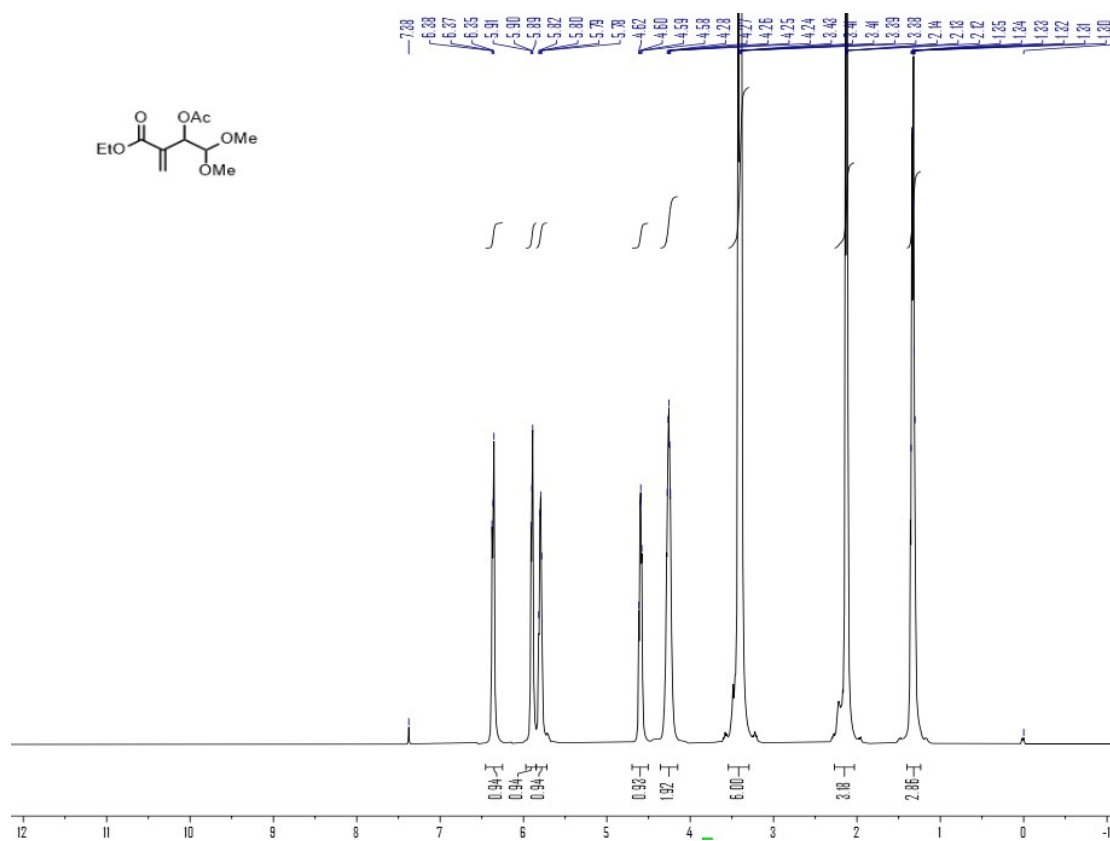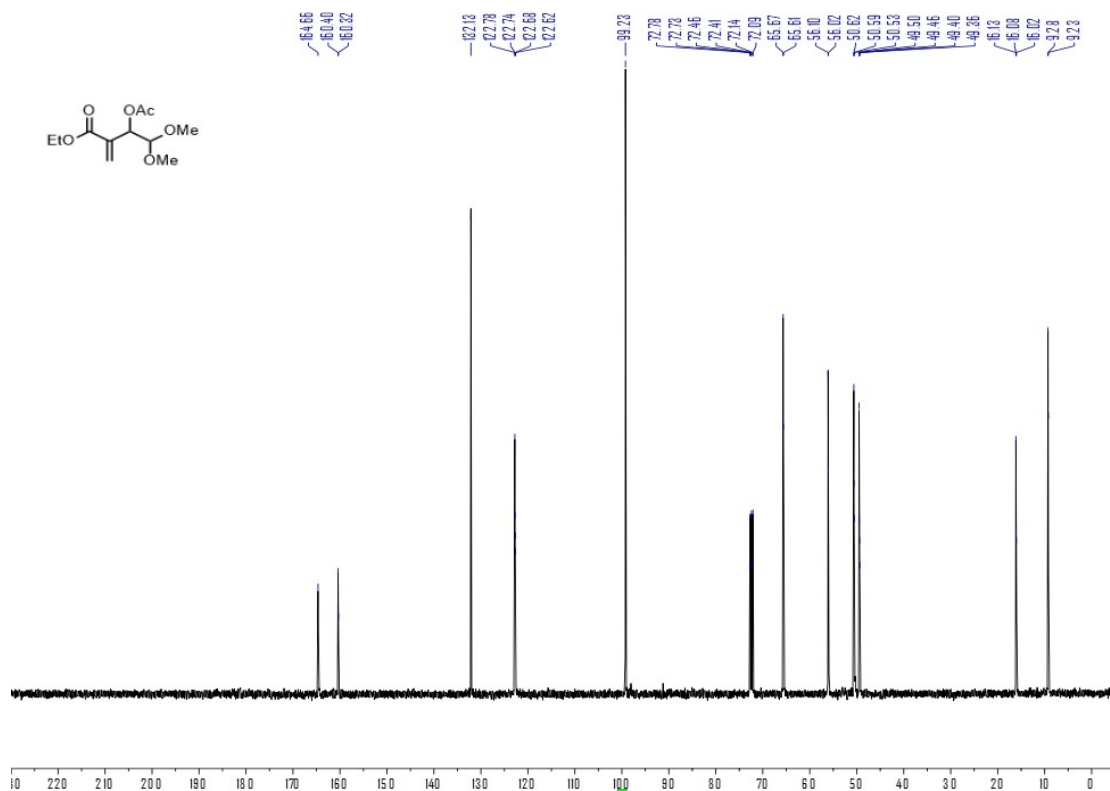



**3-Hydroxy-4,4-dimethoxy-2-methylene-1-phenylbutan-1-one**

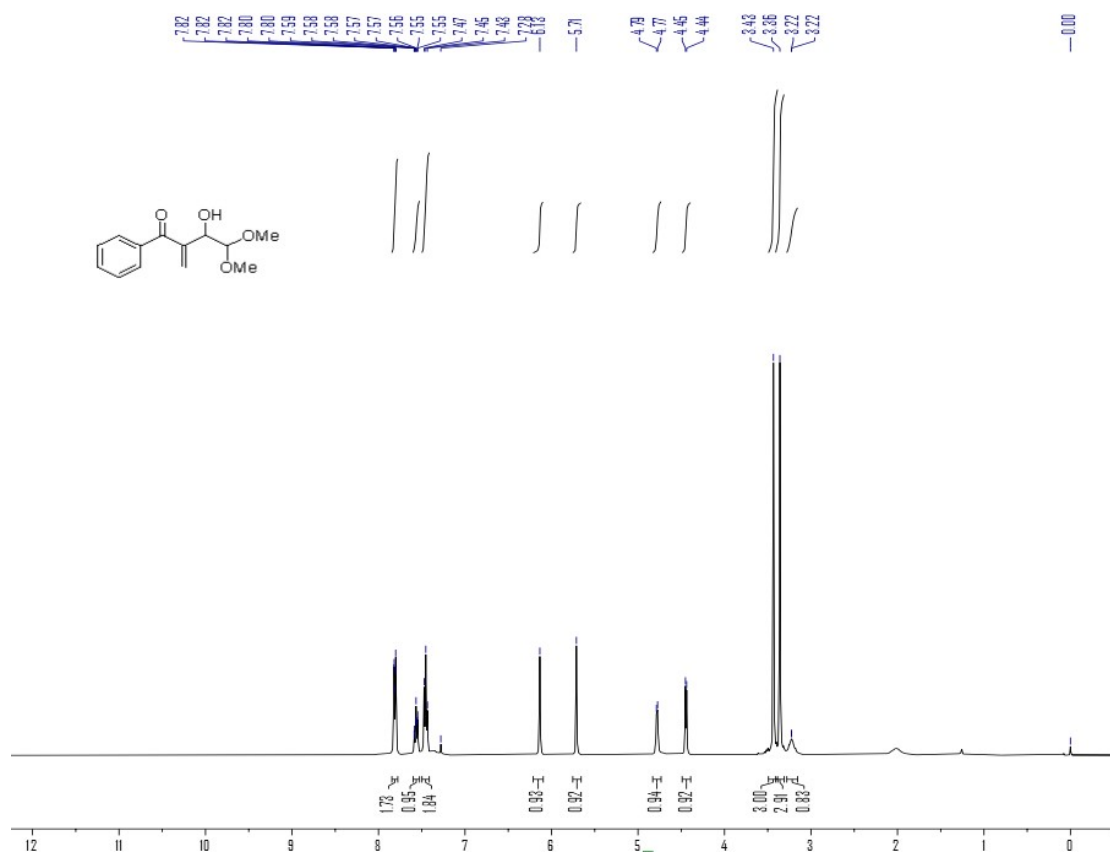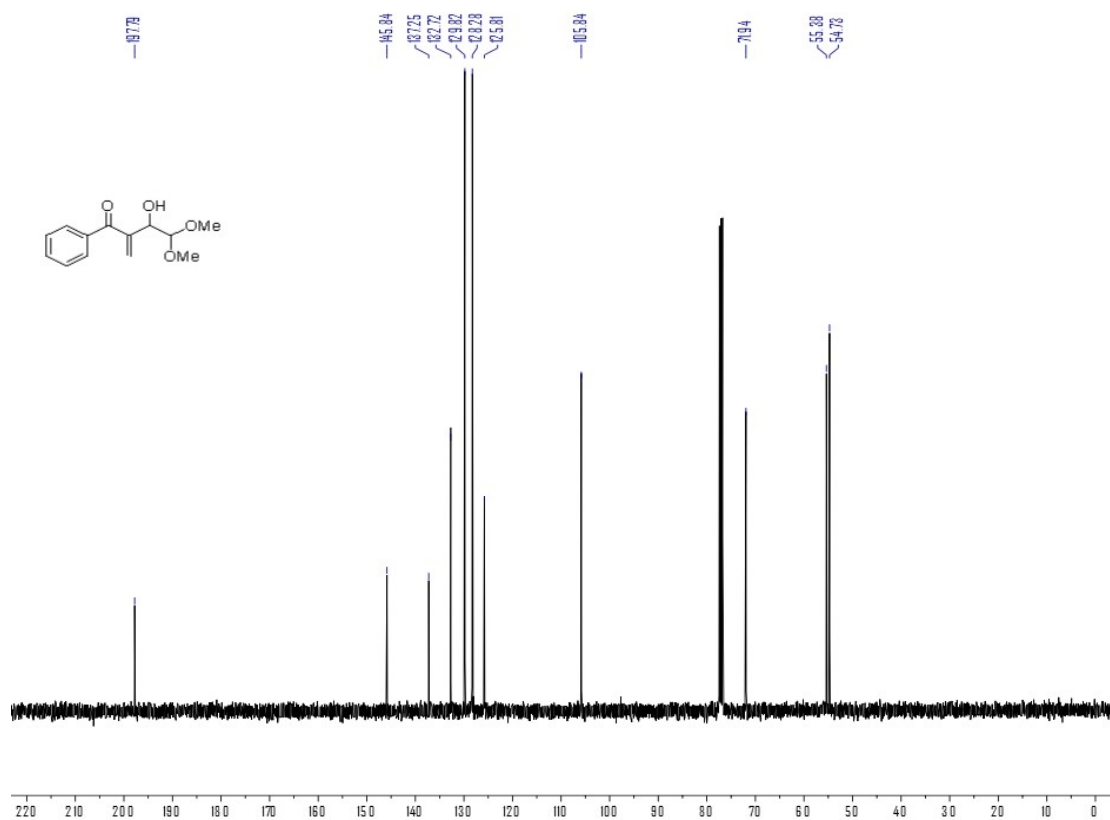

3-Benzoyl-1,1-dimethoxybut-3-en-2-yl acetate

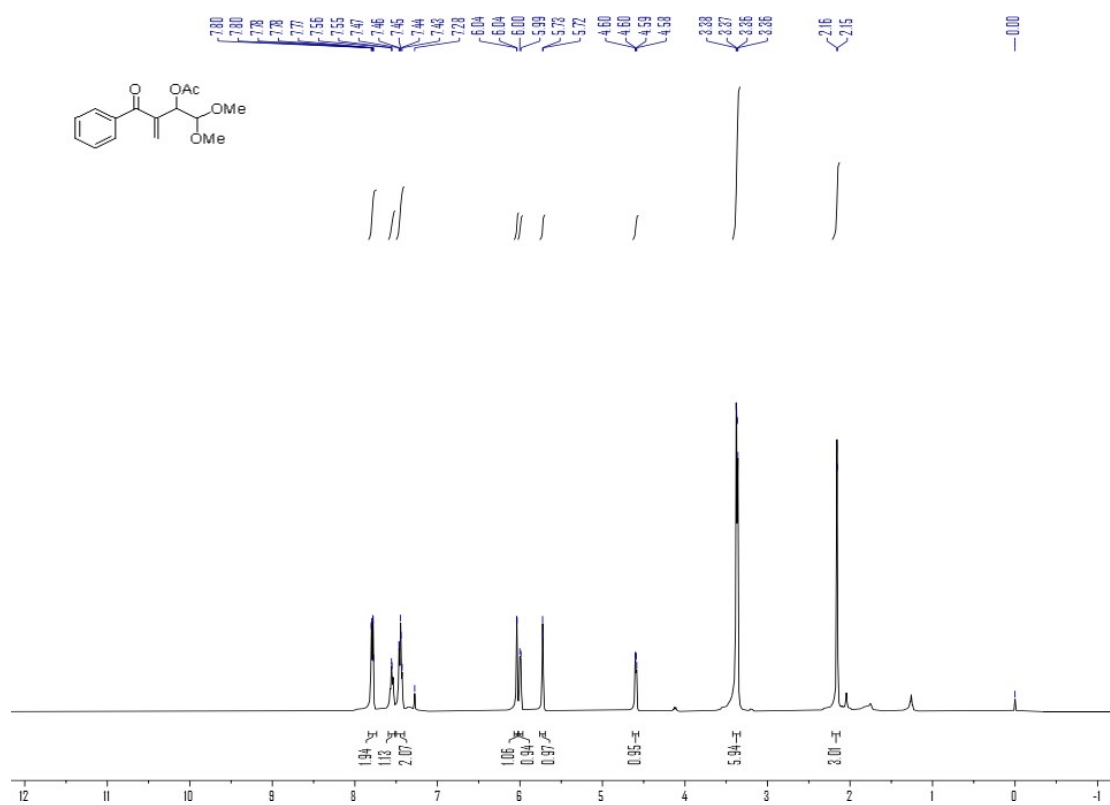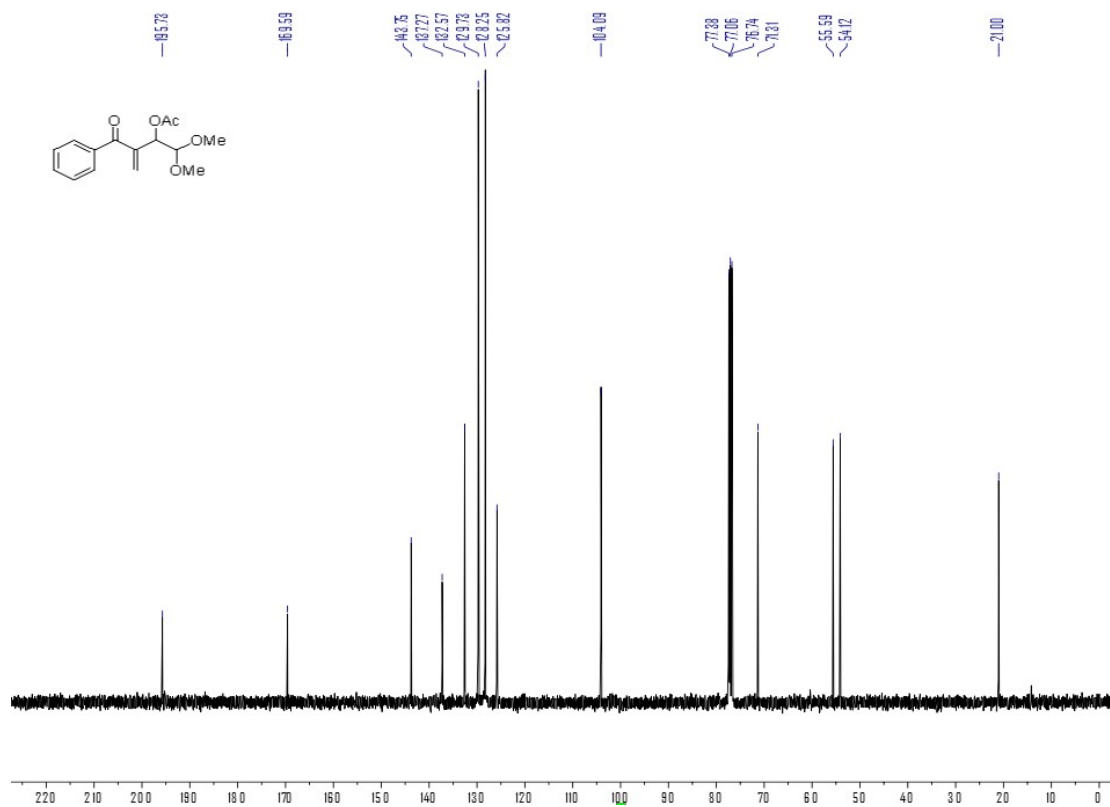

**Benzyl 1-(p-tolyl)-1H-pyrrole-3-carboxylate (3a)**

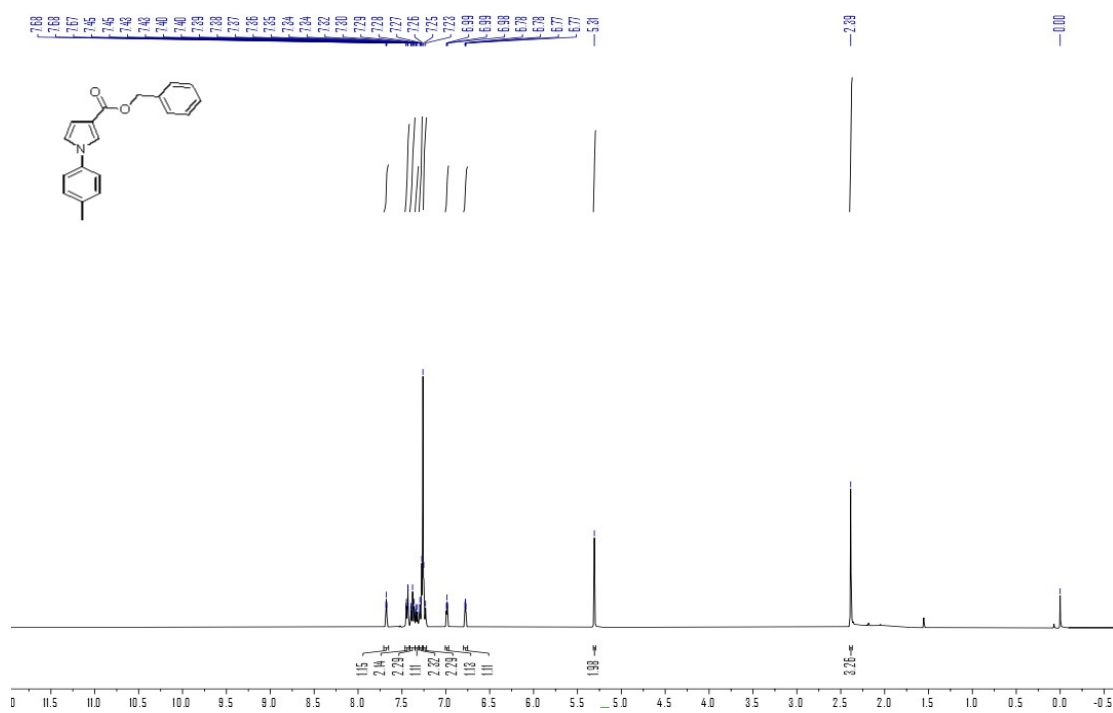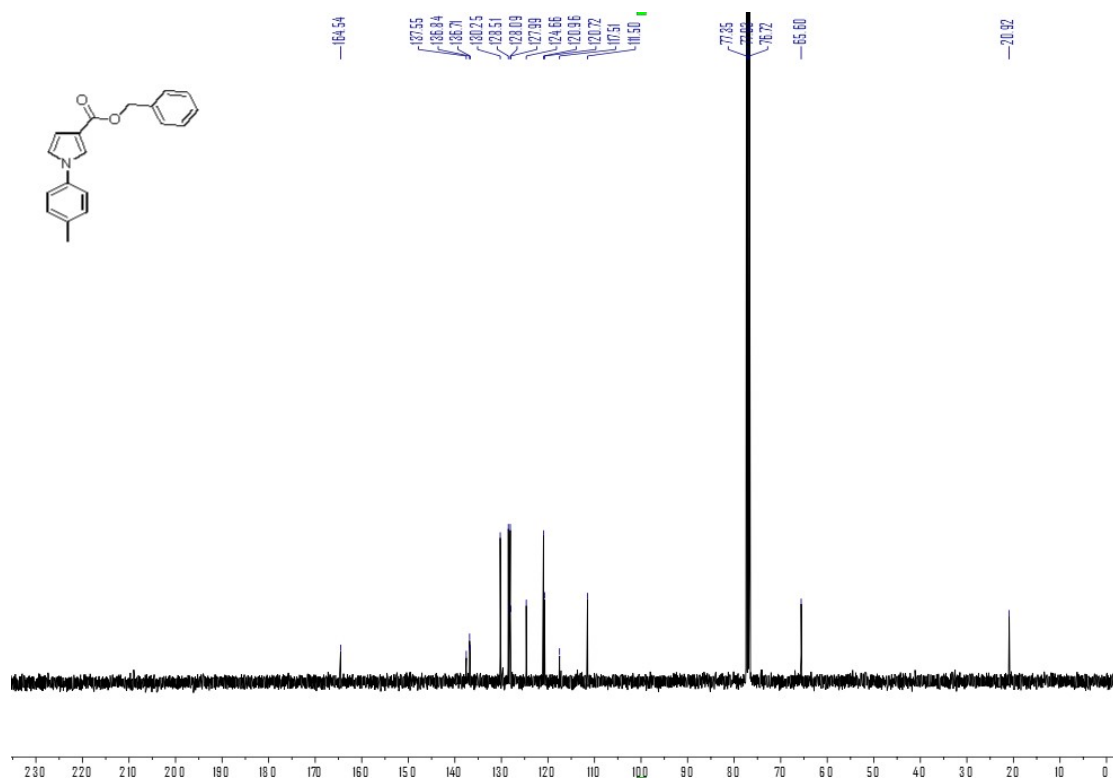

**Benzyl 1-phenyl-1H-pyrrole-3-carboxylate (3b)**

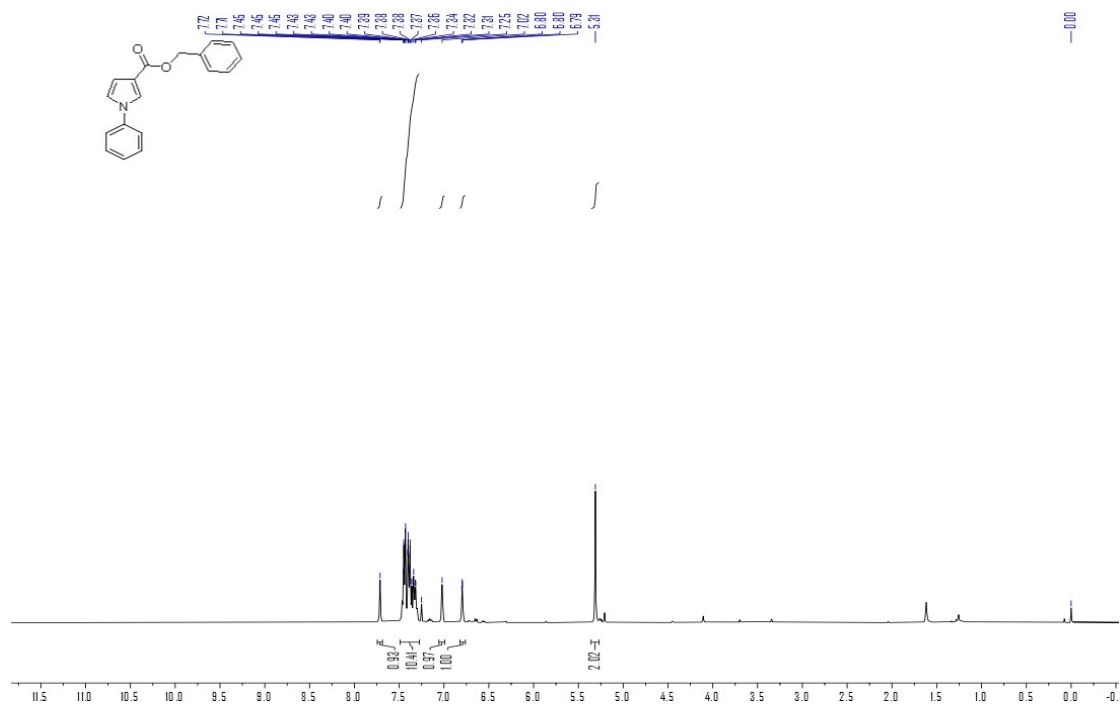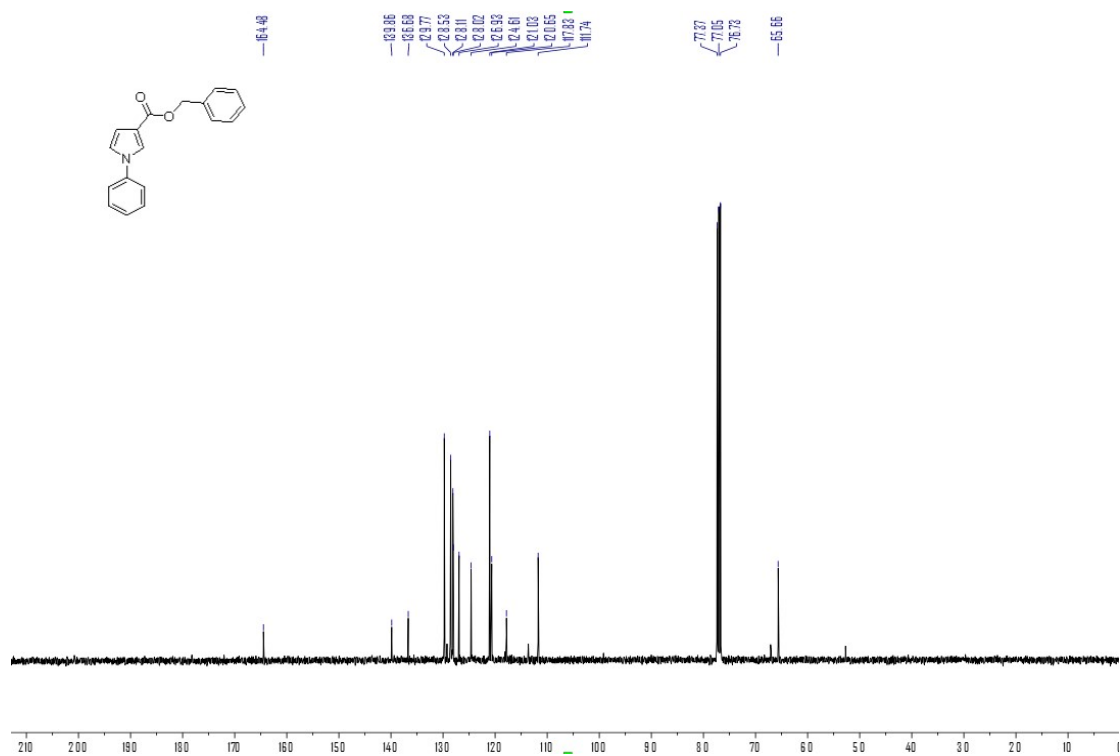

**Benzyl 1-(4-(tert-butyl)phenyl)-1H-pyrrole-3-carboxylate (3c)**

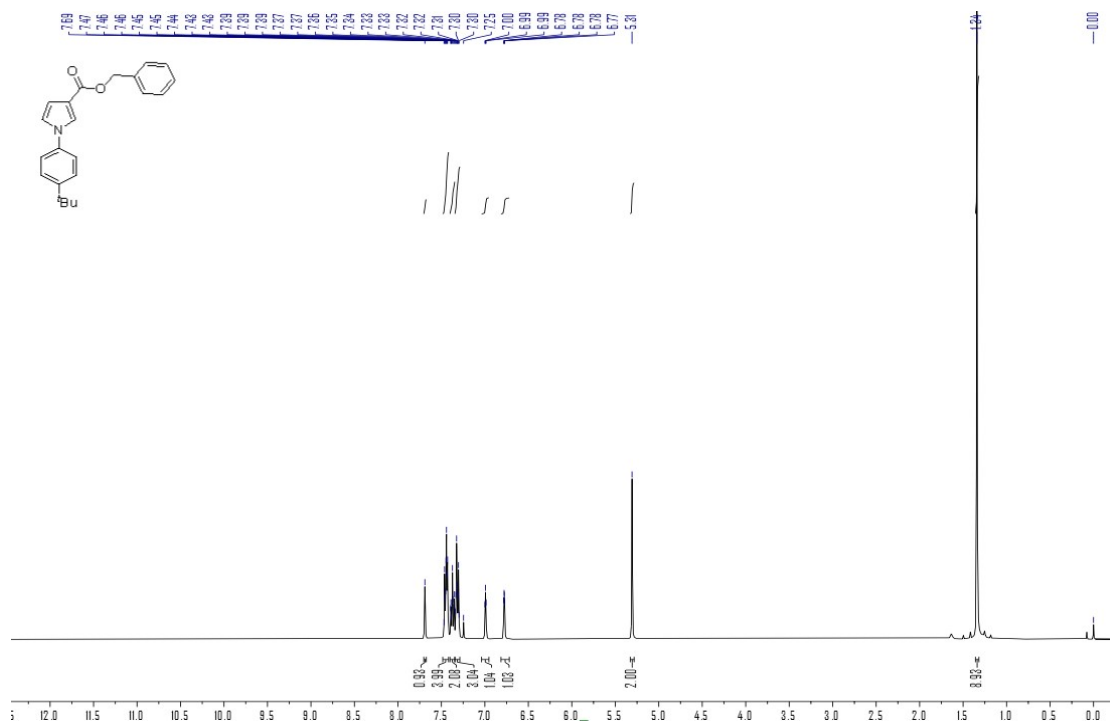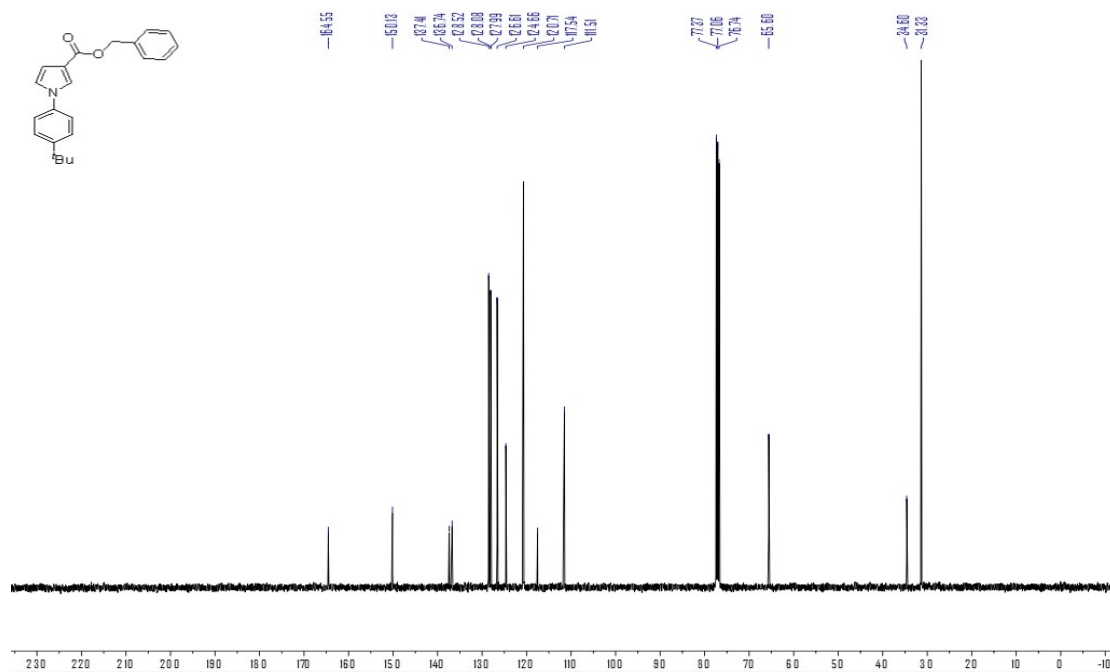



### Benzyl 1-(4-phenoxyphenyl)-1H-pyrrole-3-carboxylate (3e)

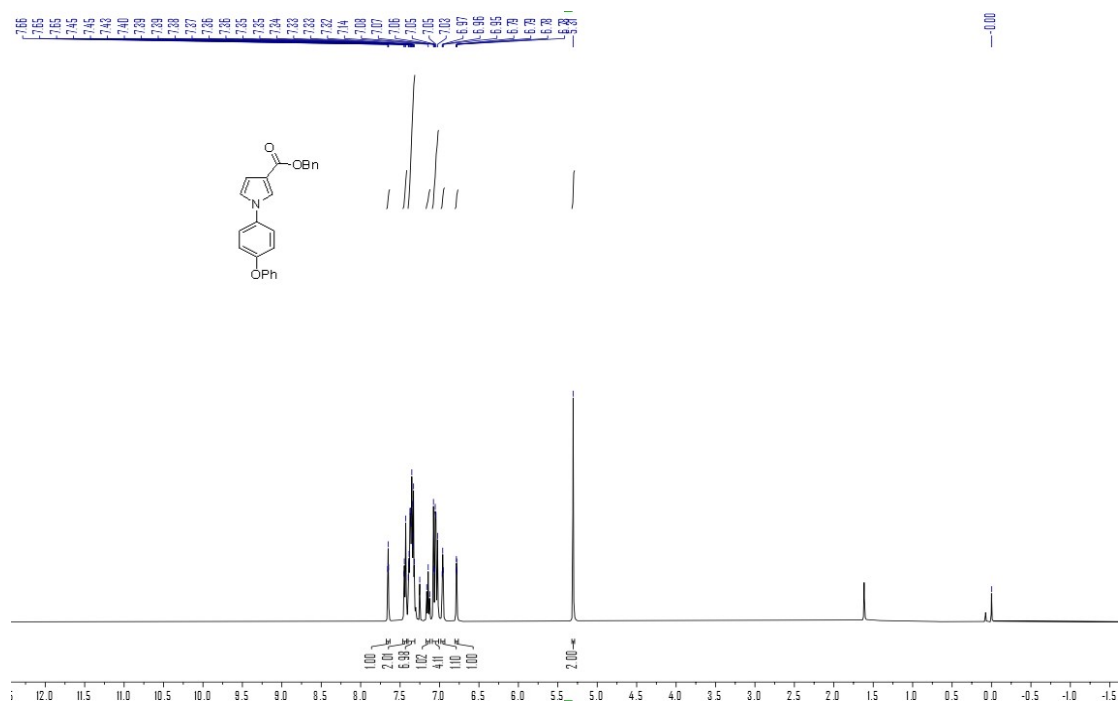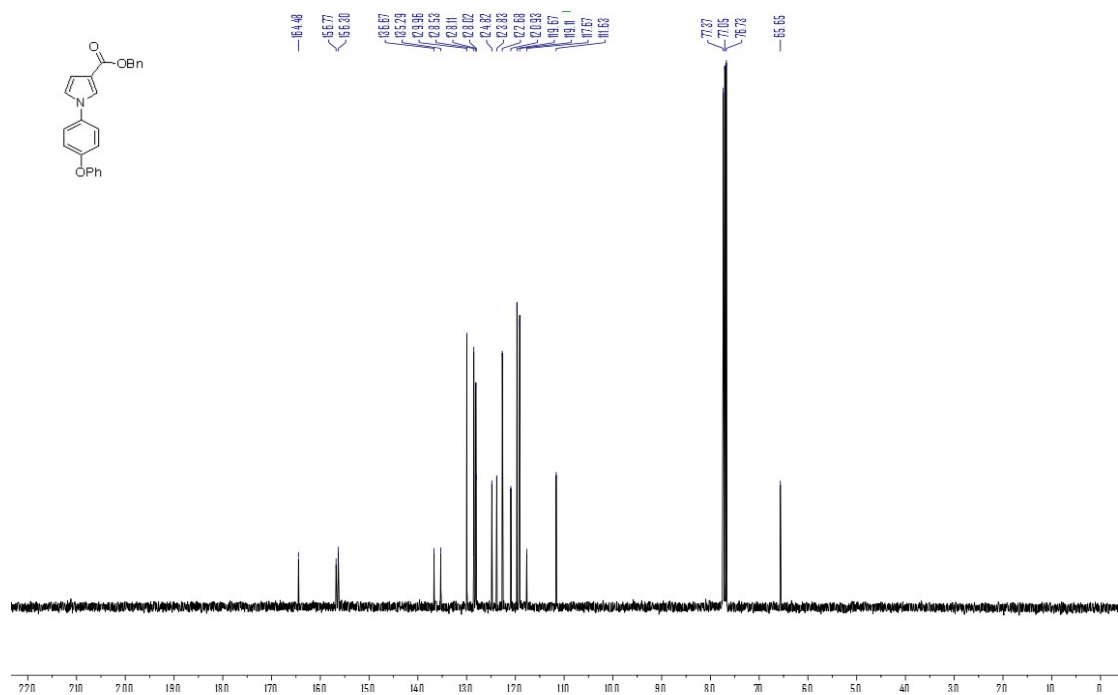

**Benzyl 1-(4-(trifluoromethoxy)phenyl)-1H-pyrrole-3-carboxylate (3f)**

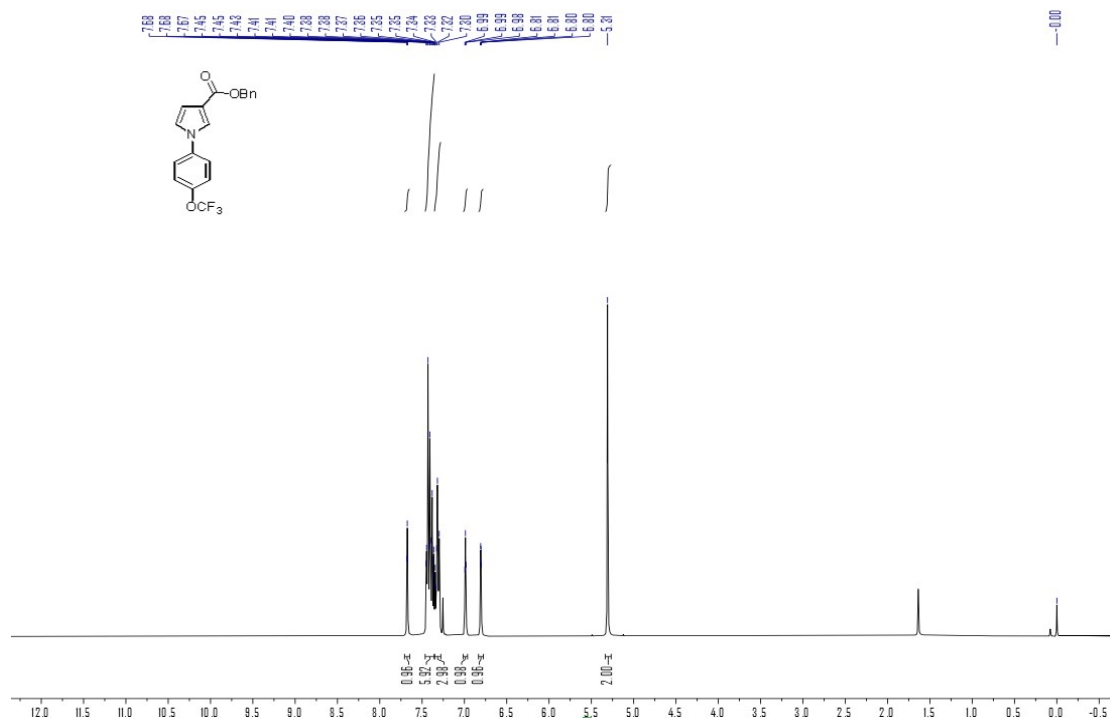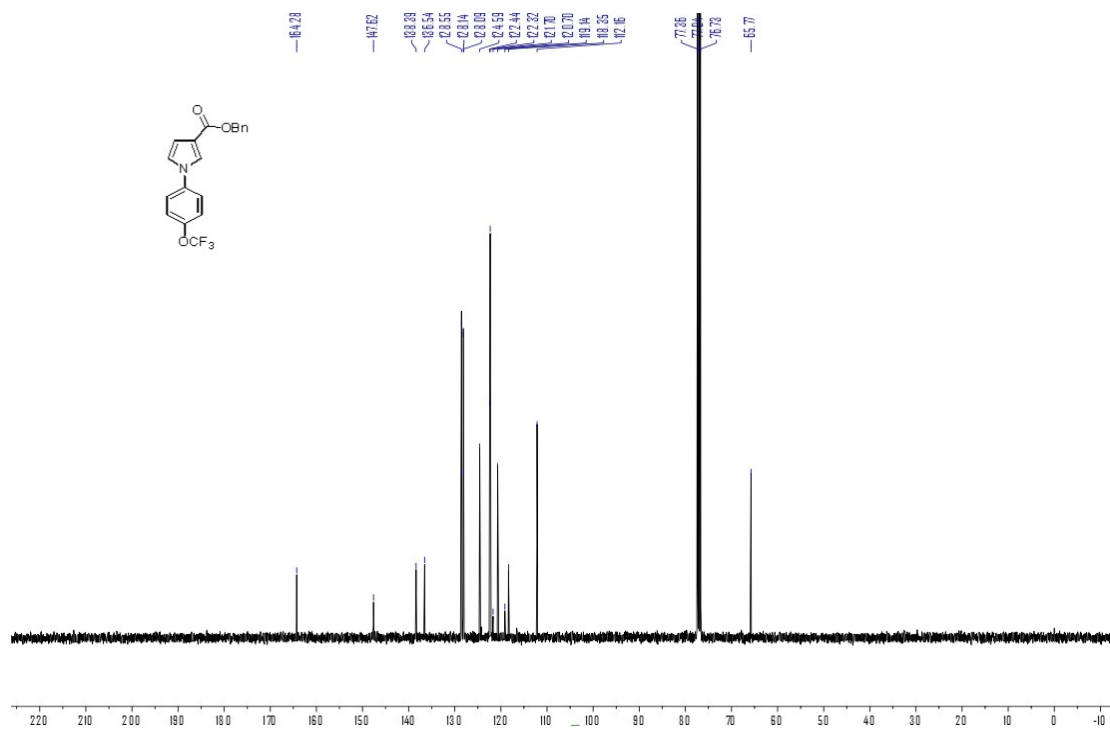



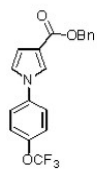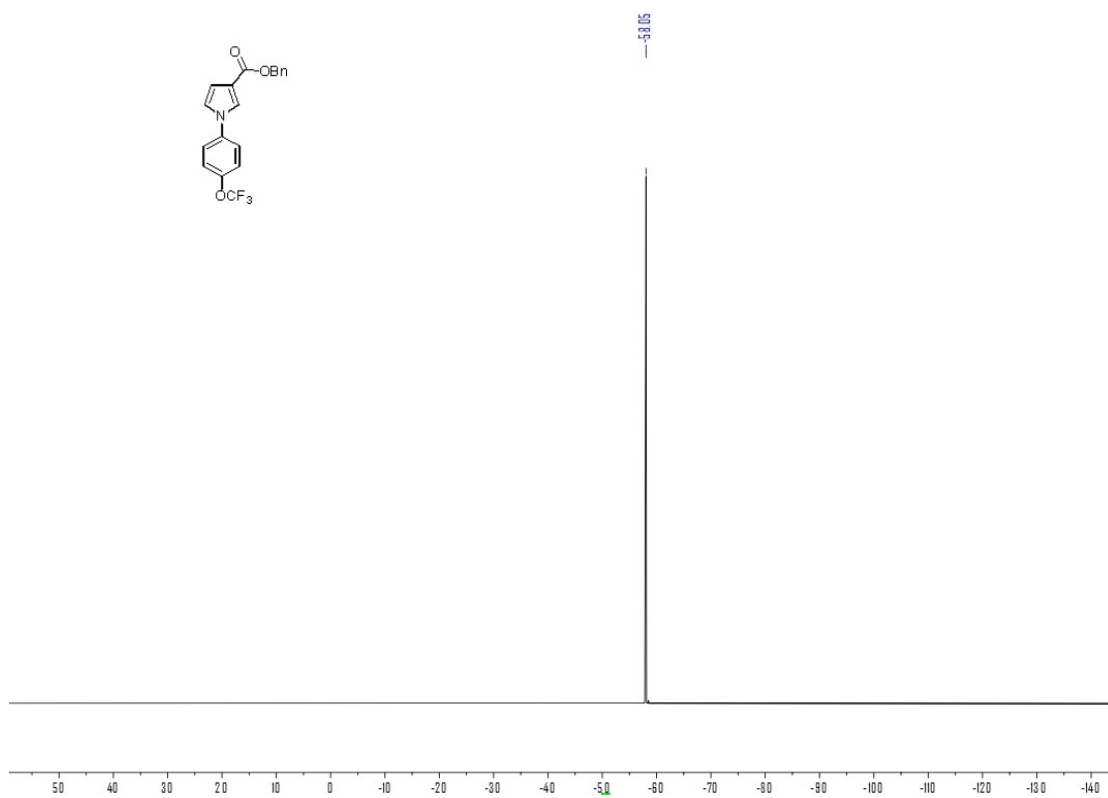

**Benzyl 1-(4-fluorophenyl)-1H-pyrrole-3-carboxylate (3g)**

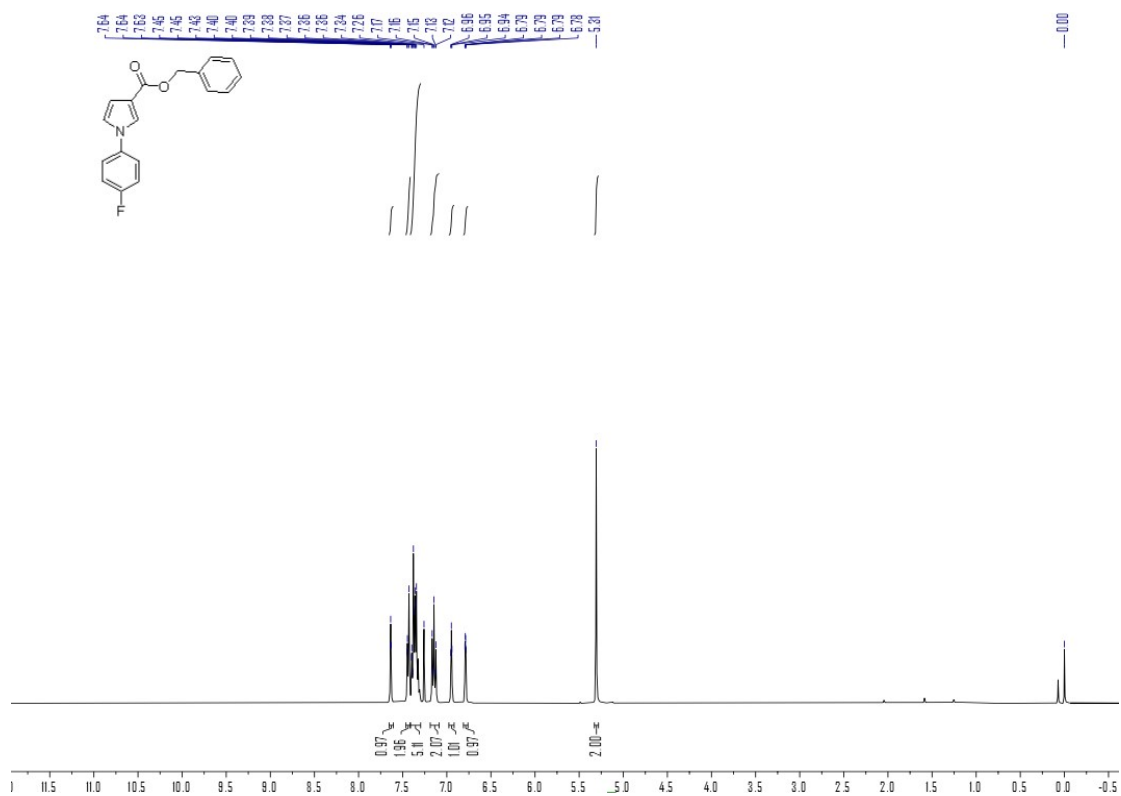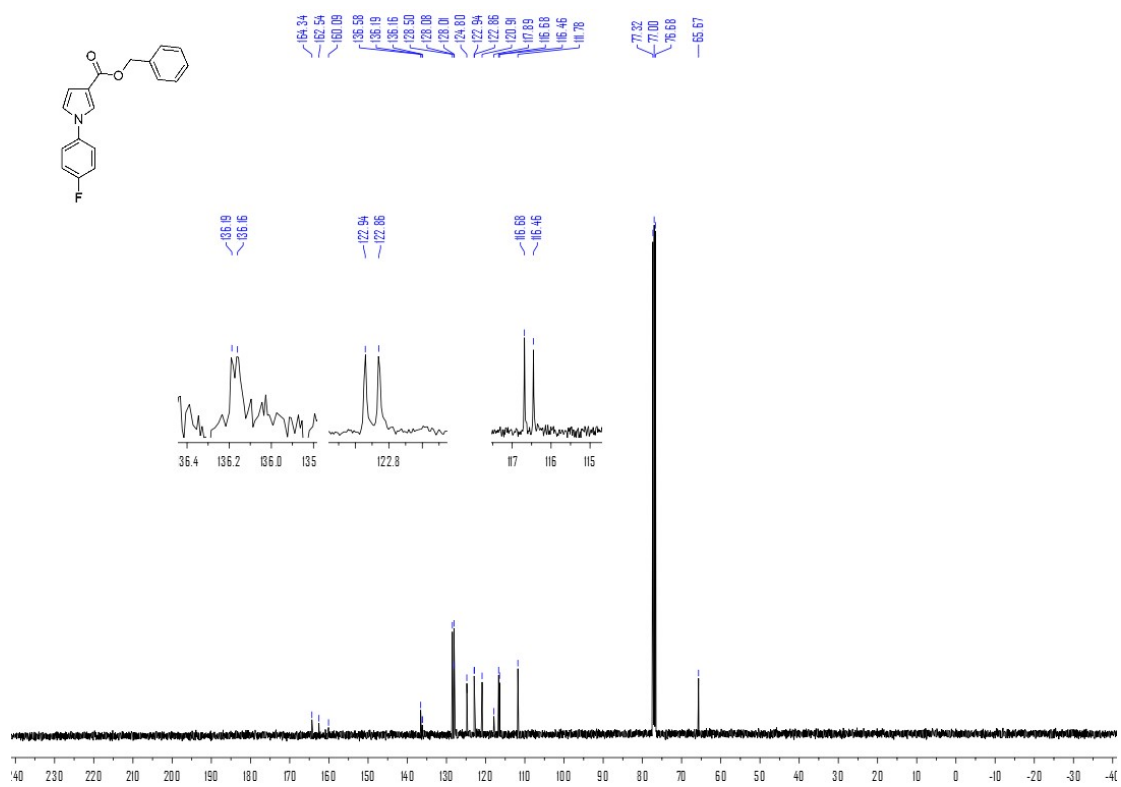

-114.88  
-114.90  
-114.91  
-114.93  
-114.95  
-114.96

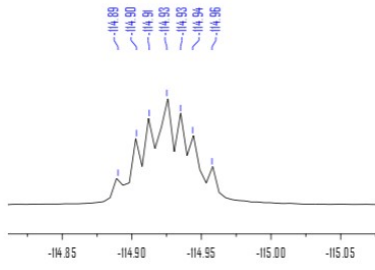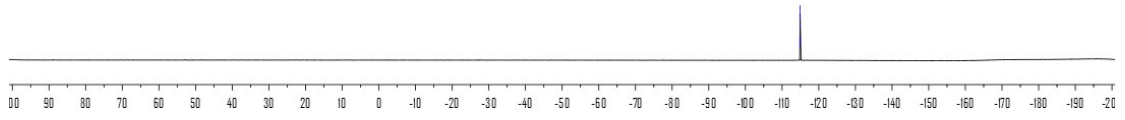



**Benzyl 1-(4-bromophenyl)-1H-pyrrole-3-carboxylate (3i)**

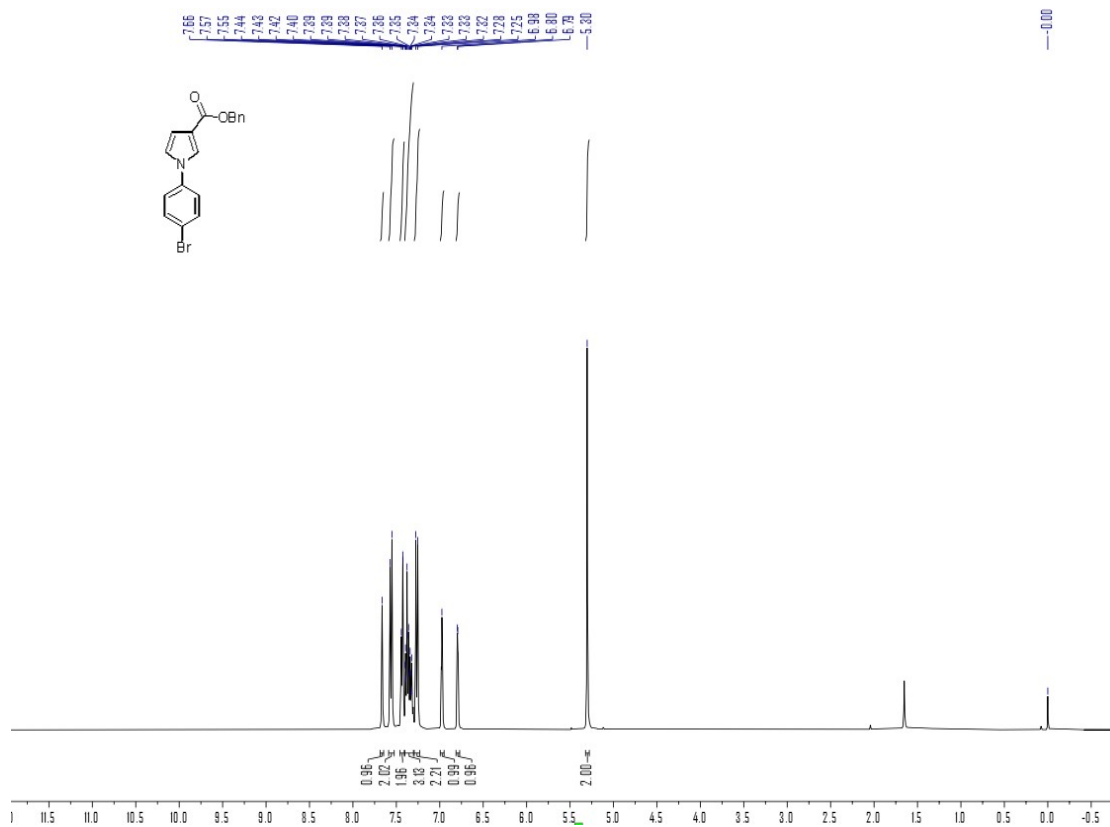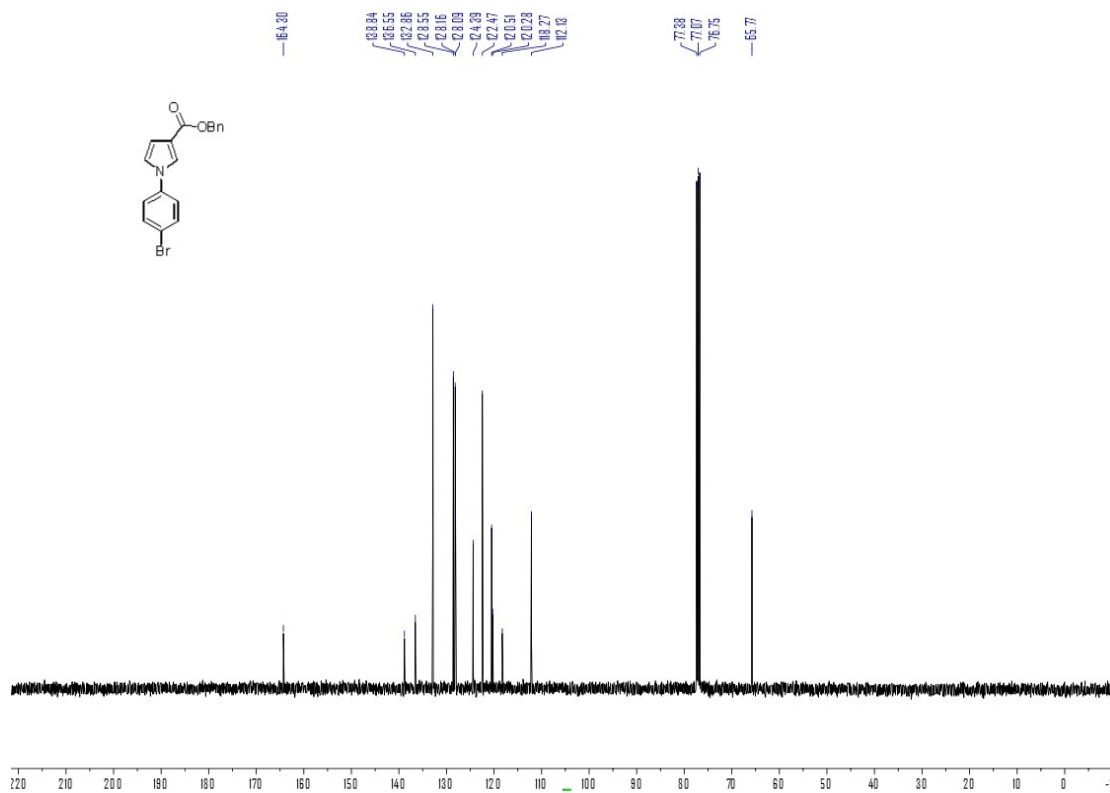

**Benzyl 1-(4-(ethoxycarbonyl)phenyl)-1H-pyrrole-3-carboxylate (3j)**

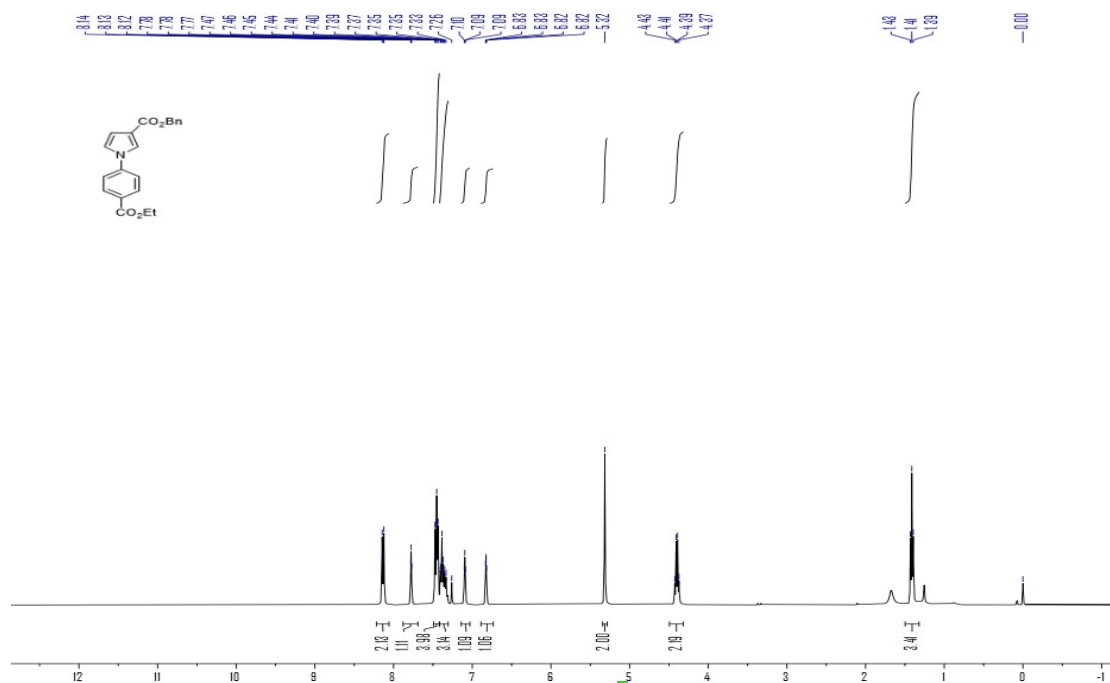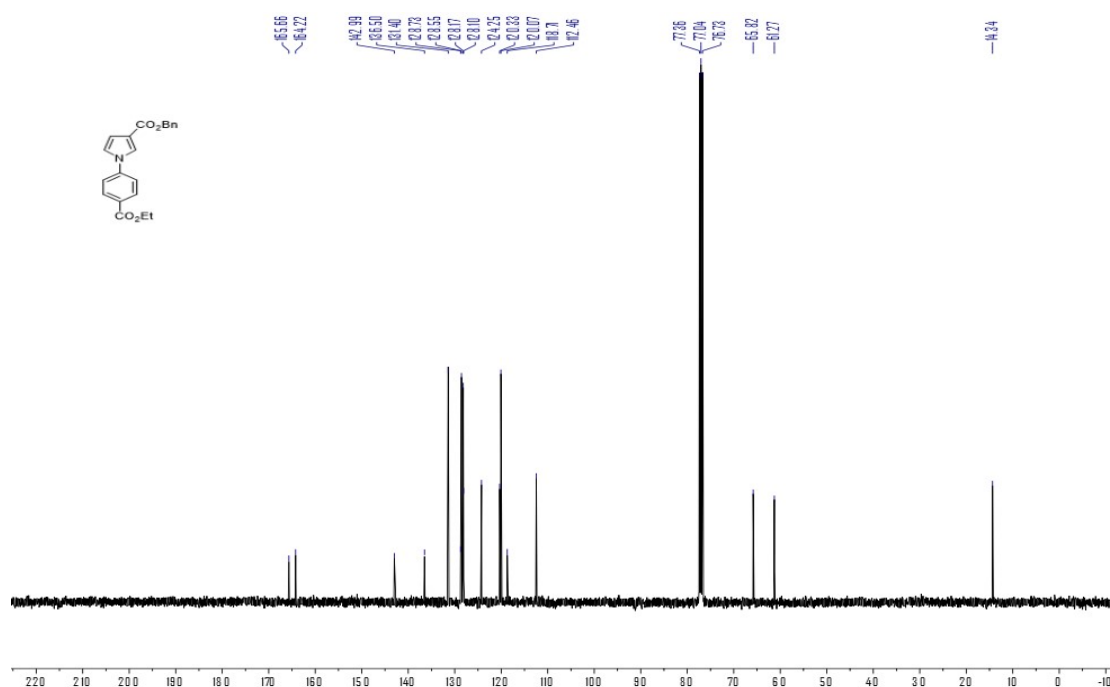







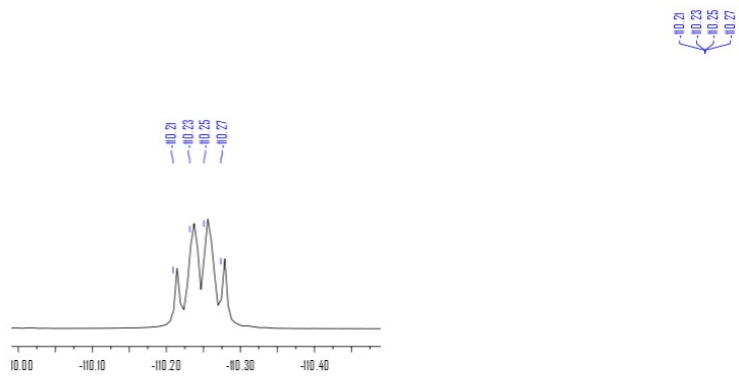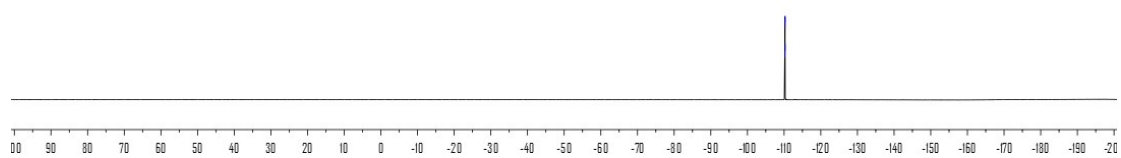

**Benzyl 1-(3-chlorophenyl)-1H-pyrrole-3-carboxylate (3m)**

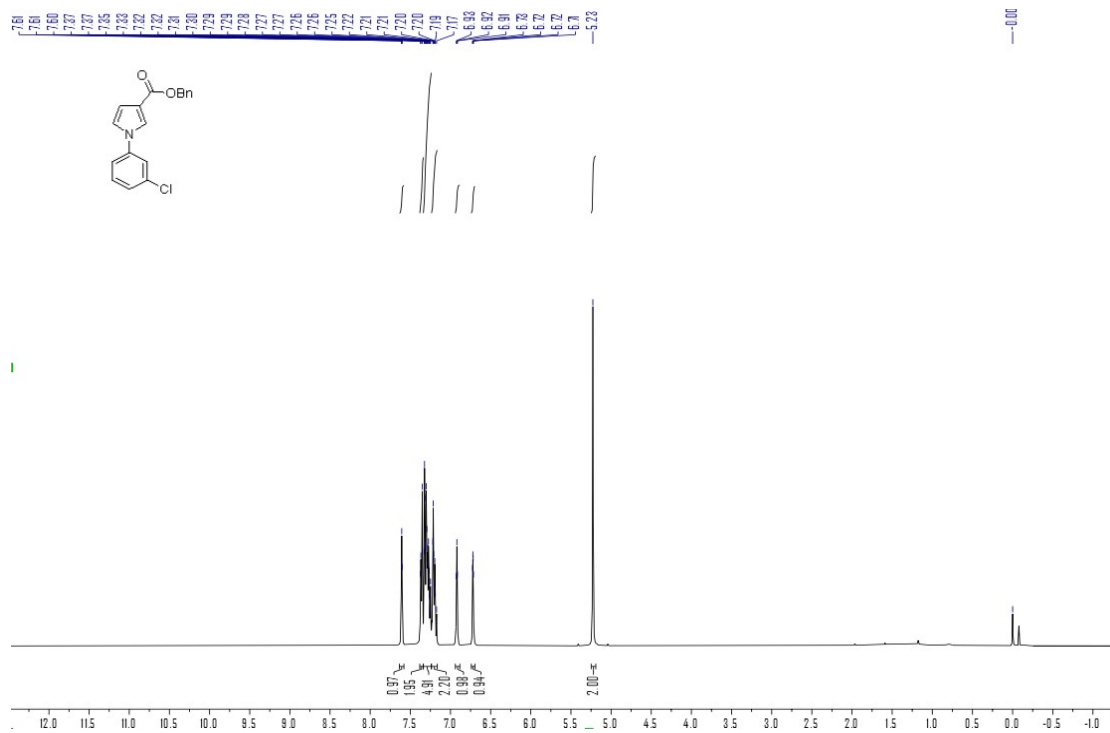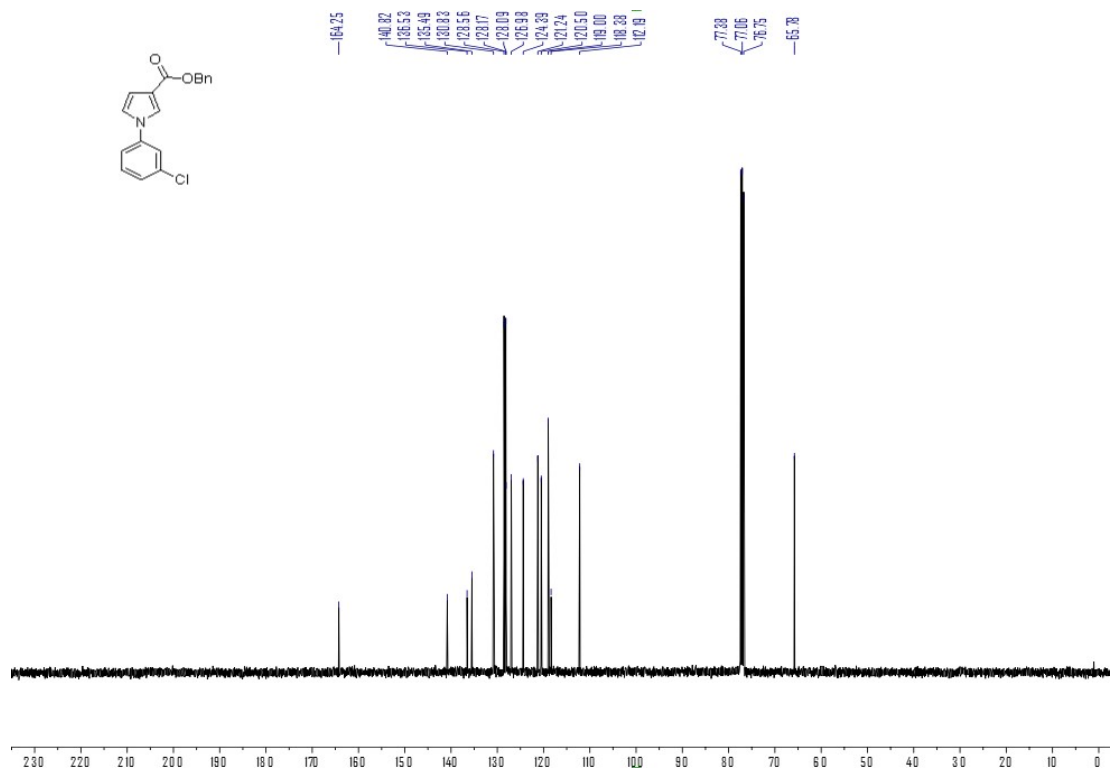



**Benzyl 1-(3-hydroxyphenyl)-1H-pyrrole-3-carboxylate (3o)**

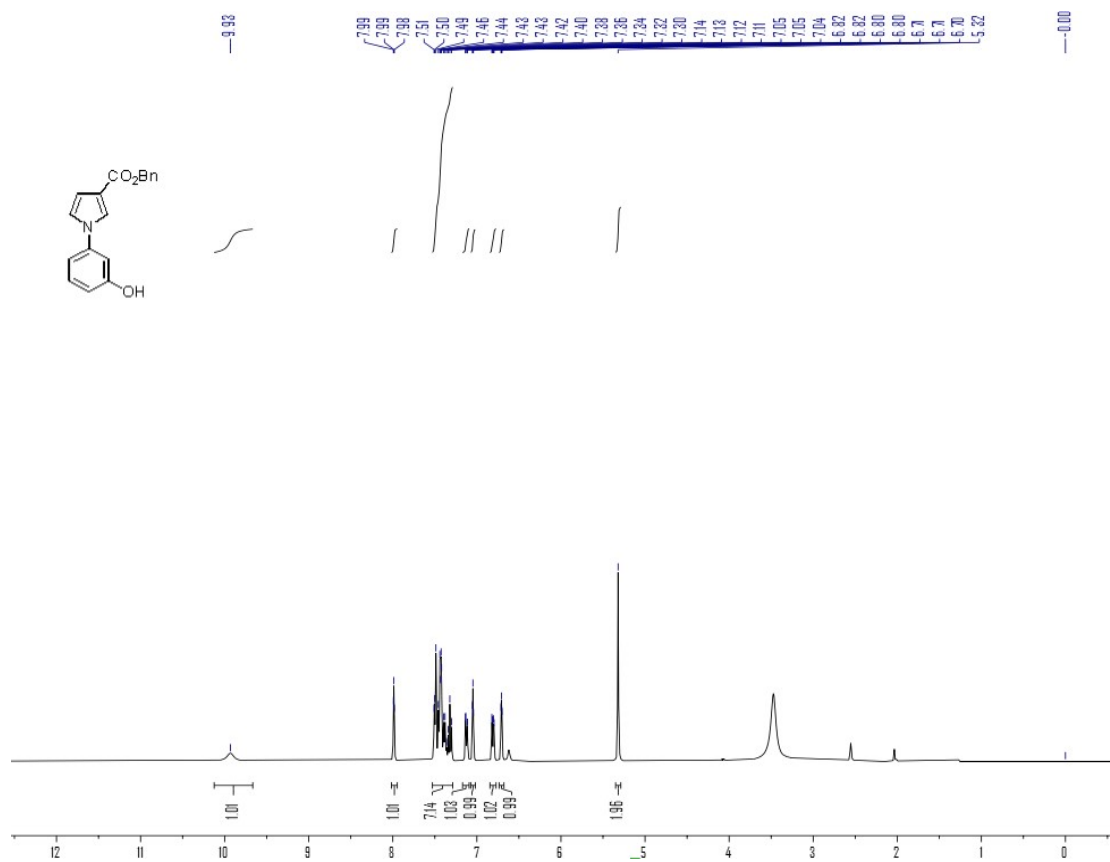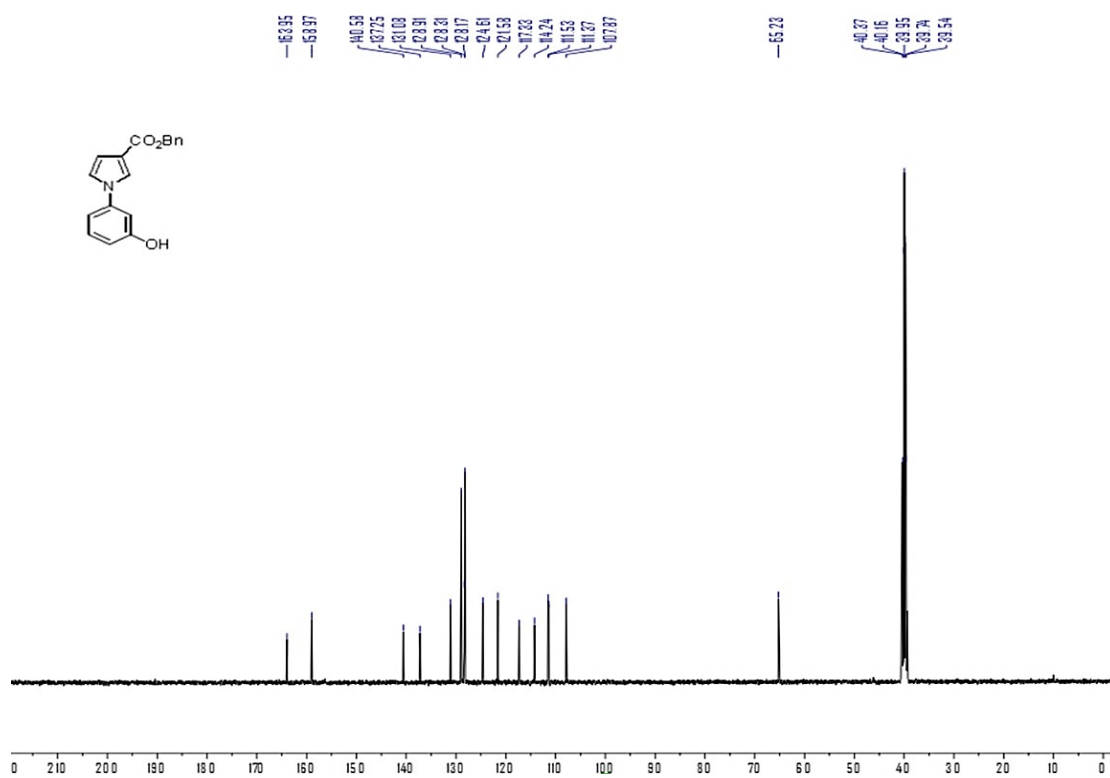

**Benzyl 1-(3-((tert-butoxycarbonyl)amino)phenyl)-1H-pyrrole-3-carboxylate (3p)**

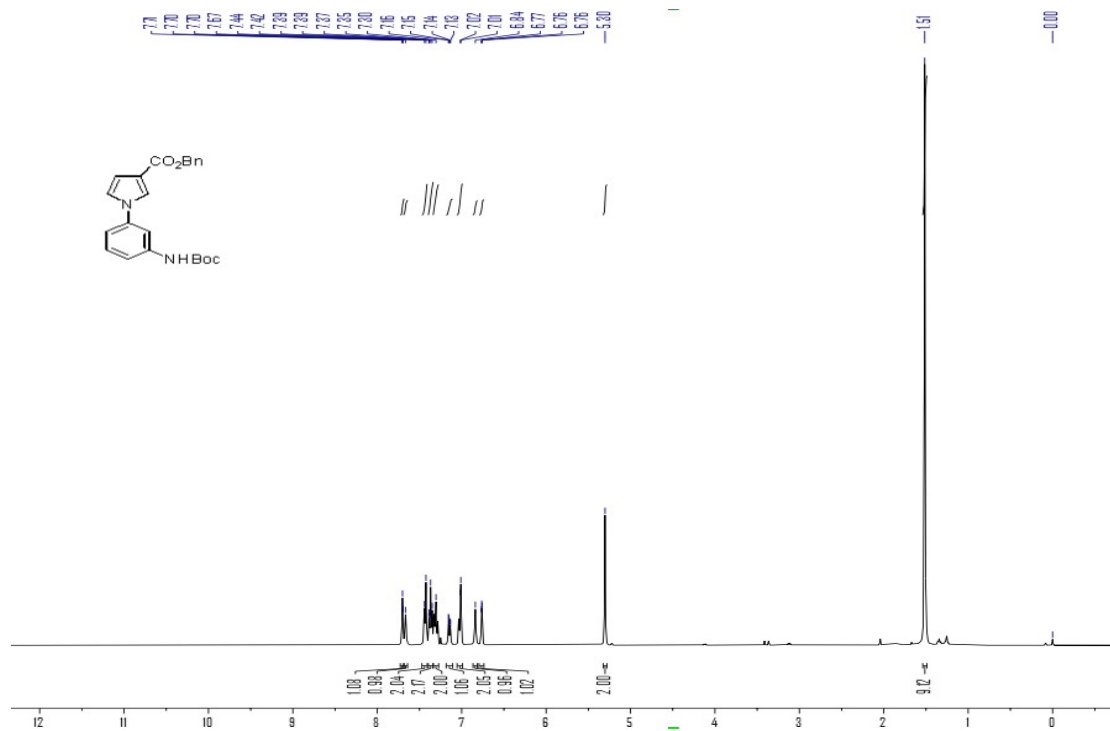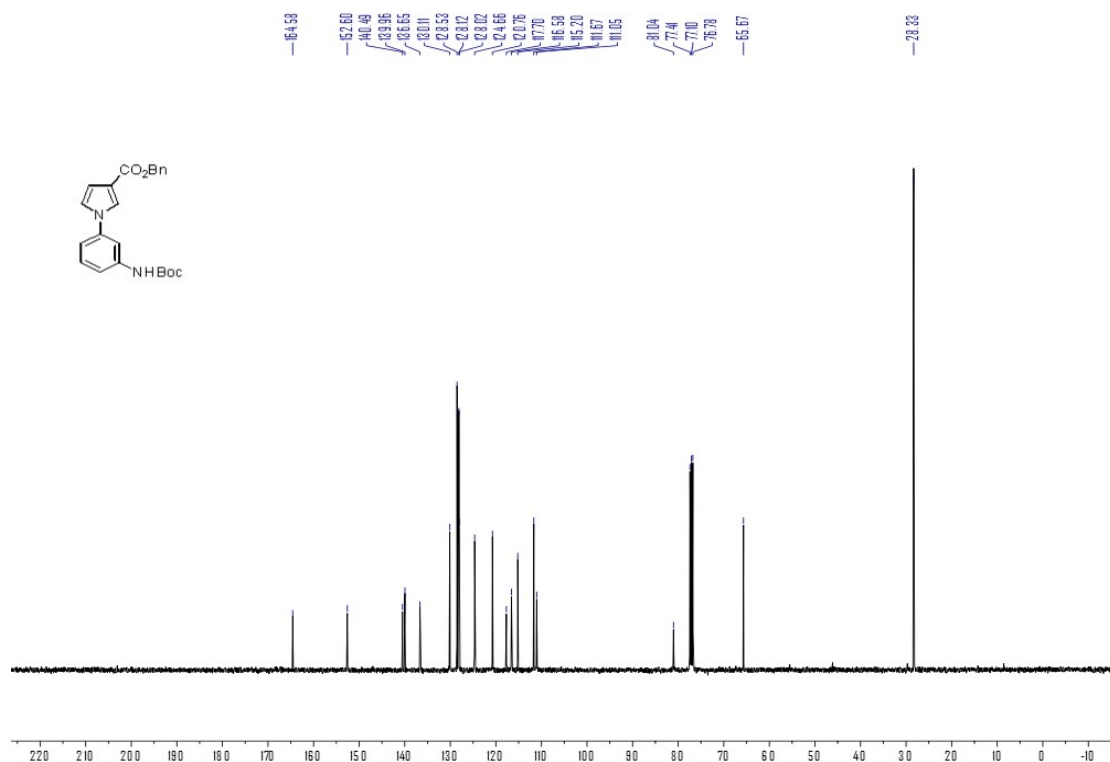

### Benzyl 1-(o-tolyl)-1H-pyrrole-3-carboxylate (3q)

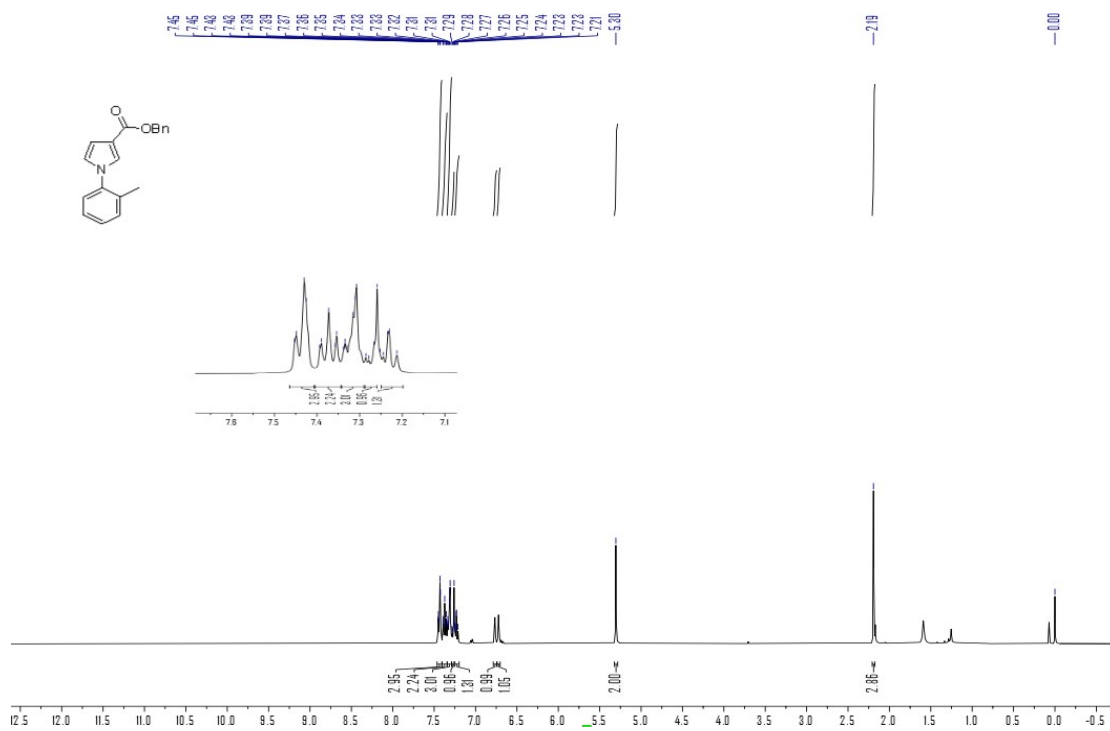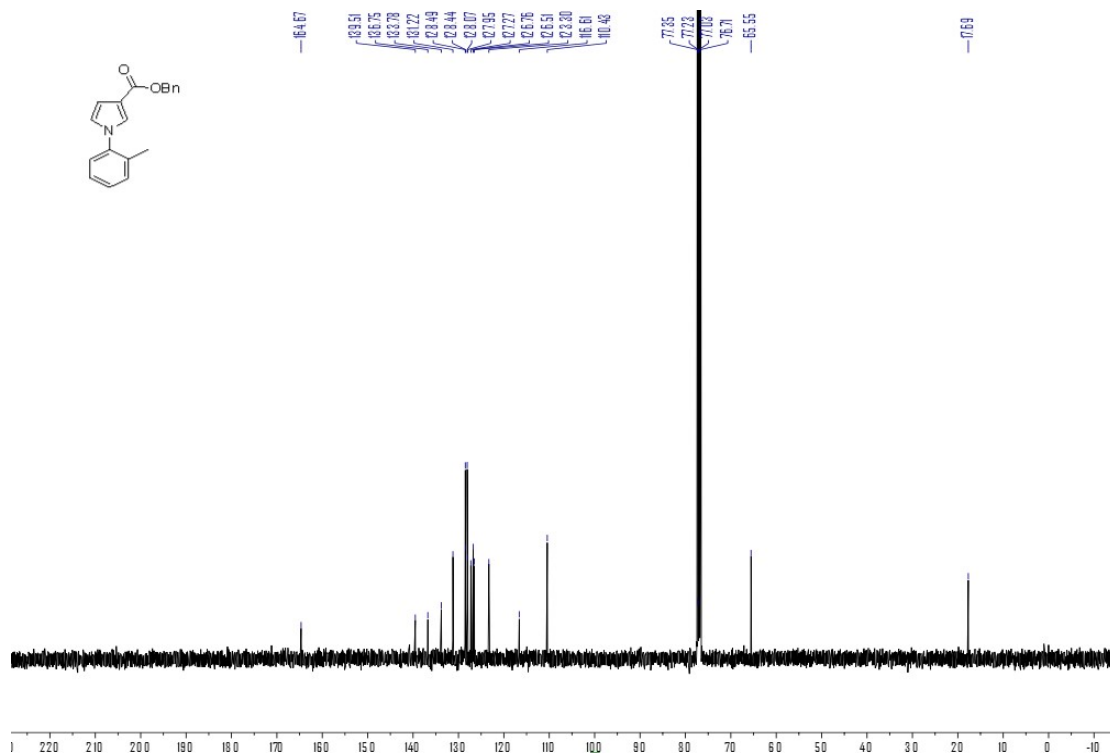

**Benzyl 1-(2-methoxyphenyl)-1H-pyrrole-3-carboxylate (3r)**

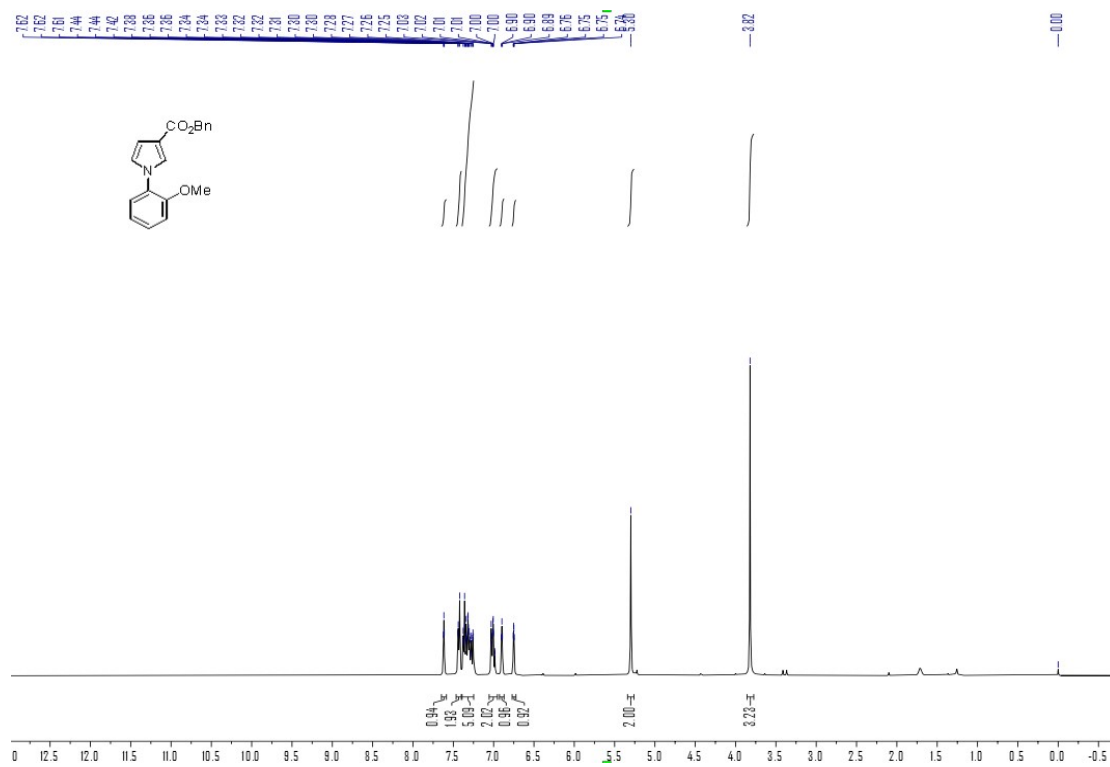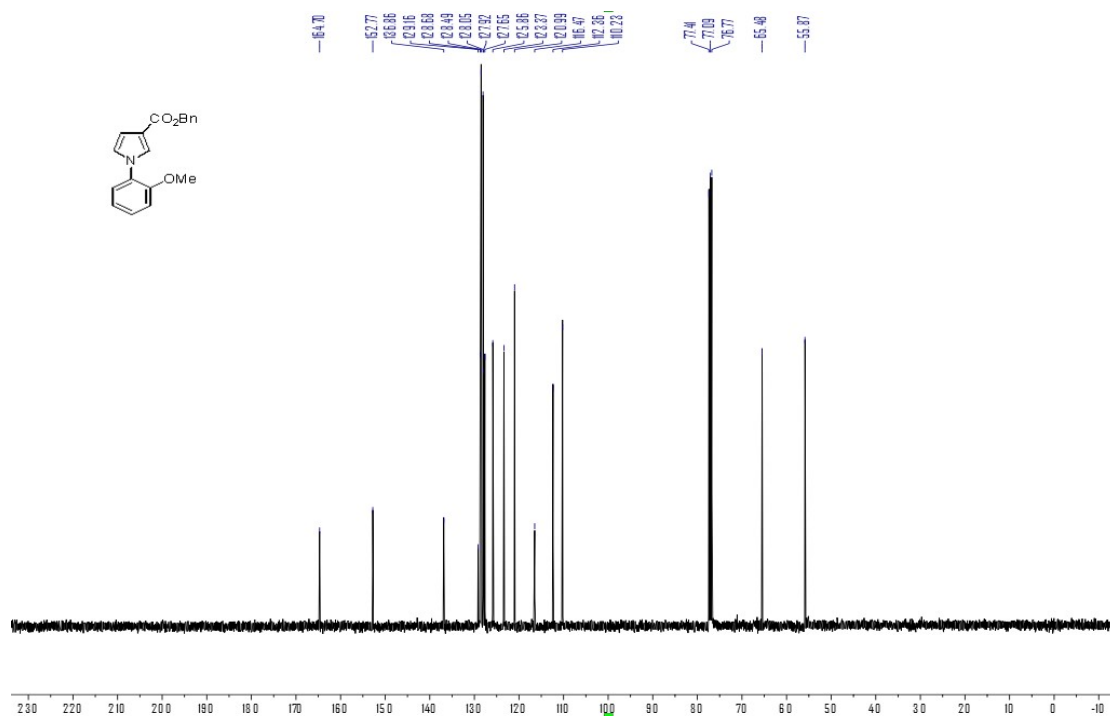

**Benzyl 1-(2-chlorophenyl)-1H-pyrrole-3-carboxylate (3s)**

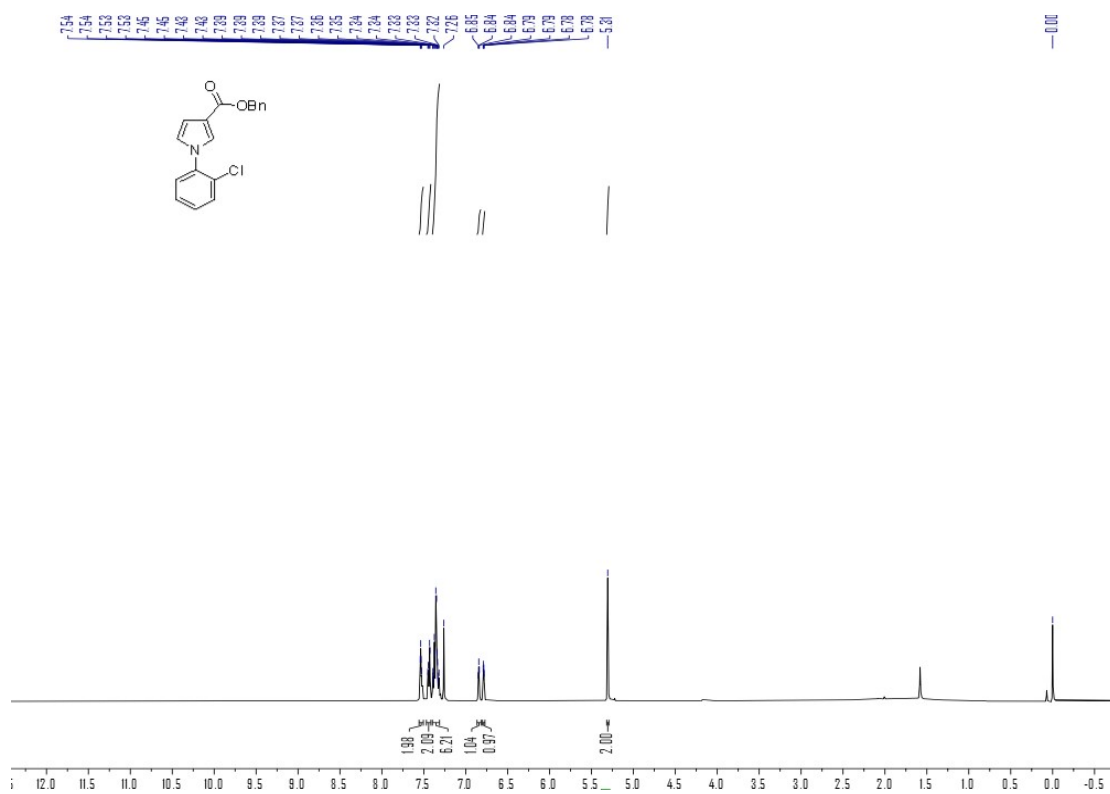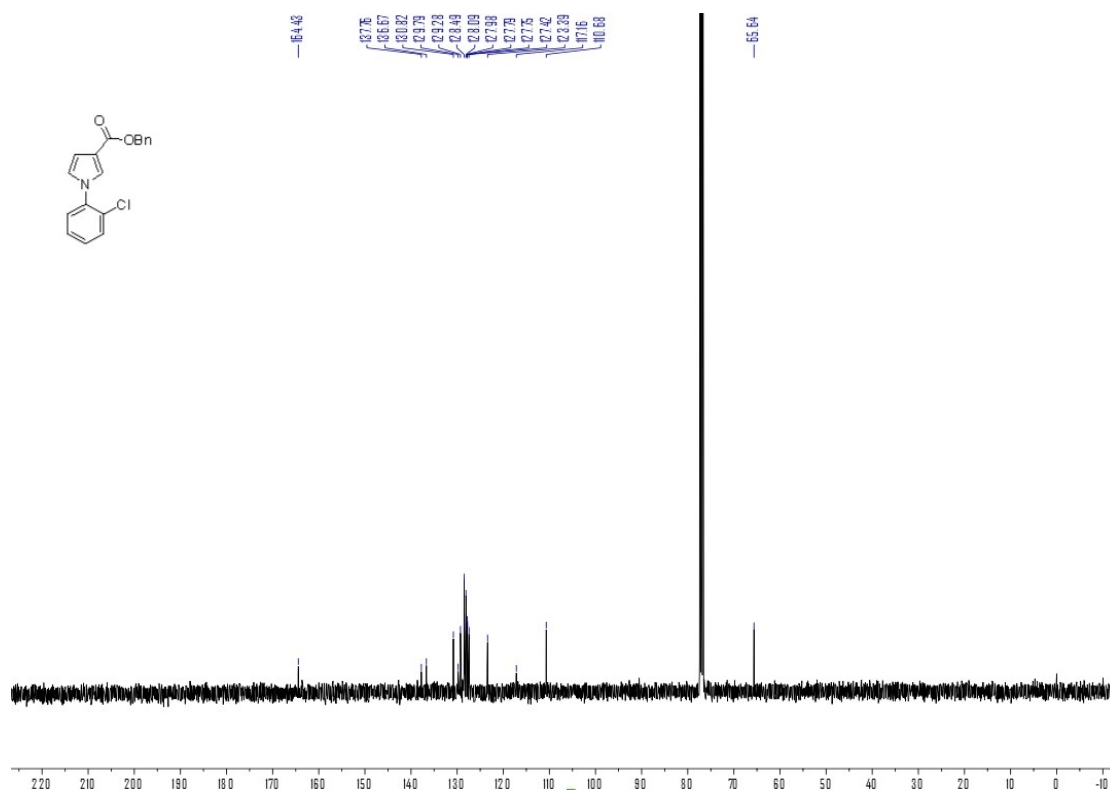



**Benzyl 1-(2,3-dimethylphenyl)-1H-pyrrole-3-carboxylate (3t)**

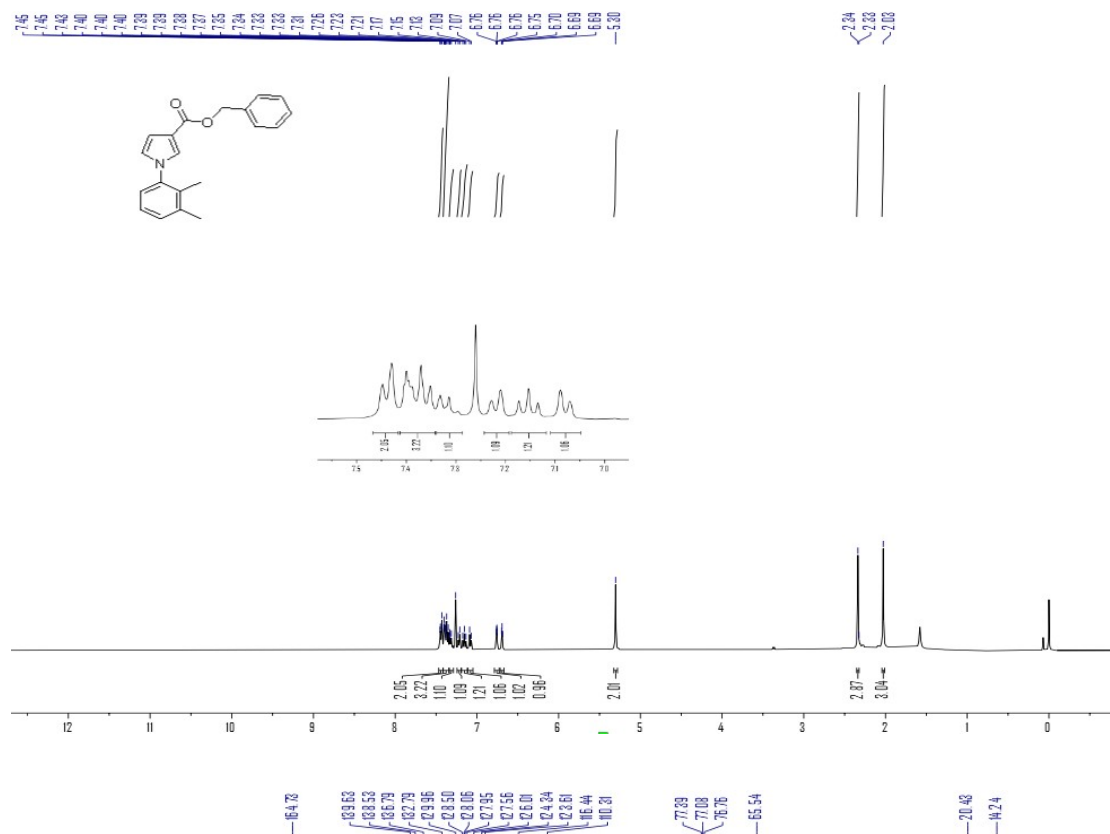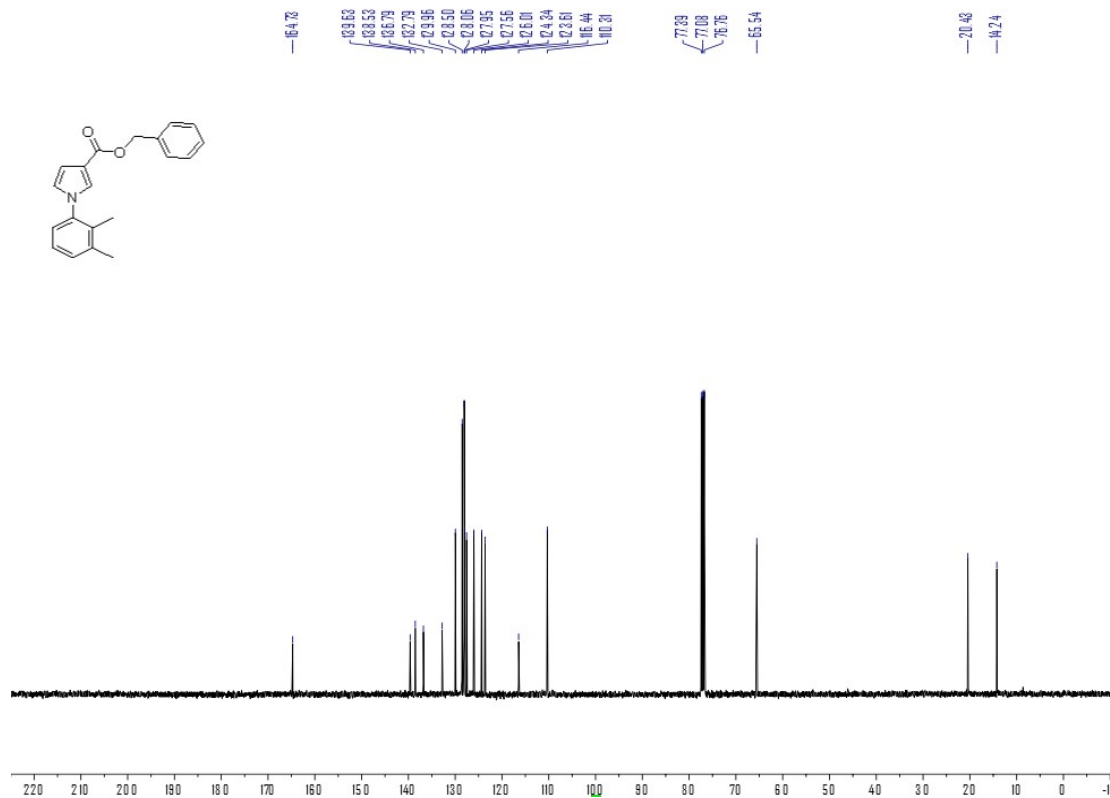

**Benzyl 1-(naphthalen-1-yl)-1H-pyrrole-3-carboxylate (3u)**

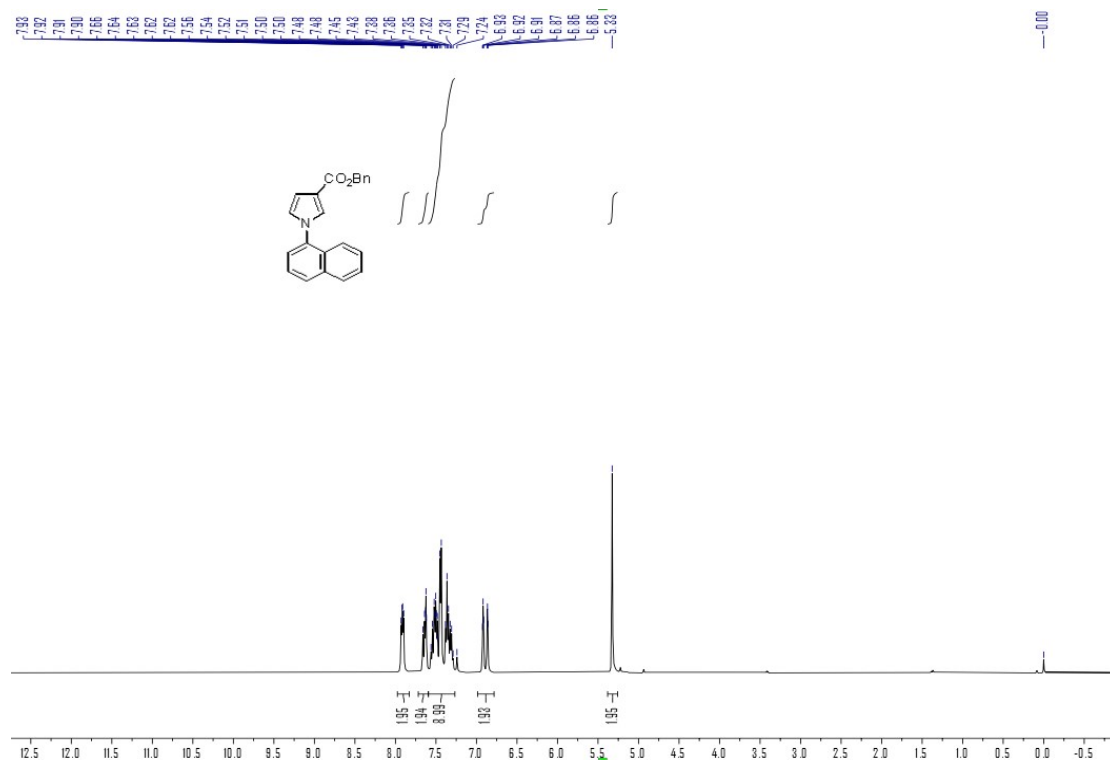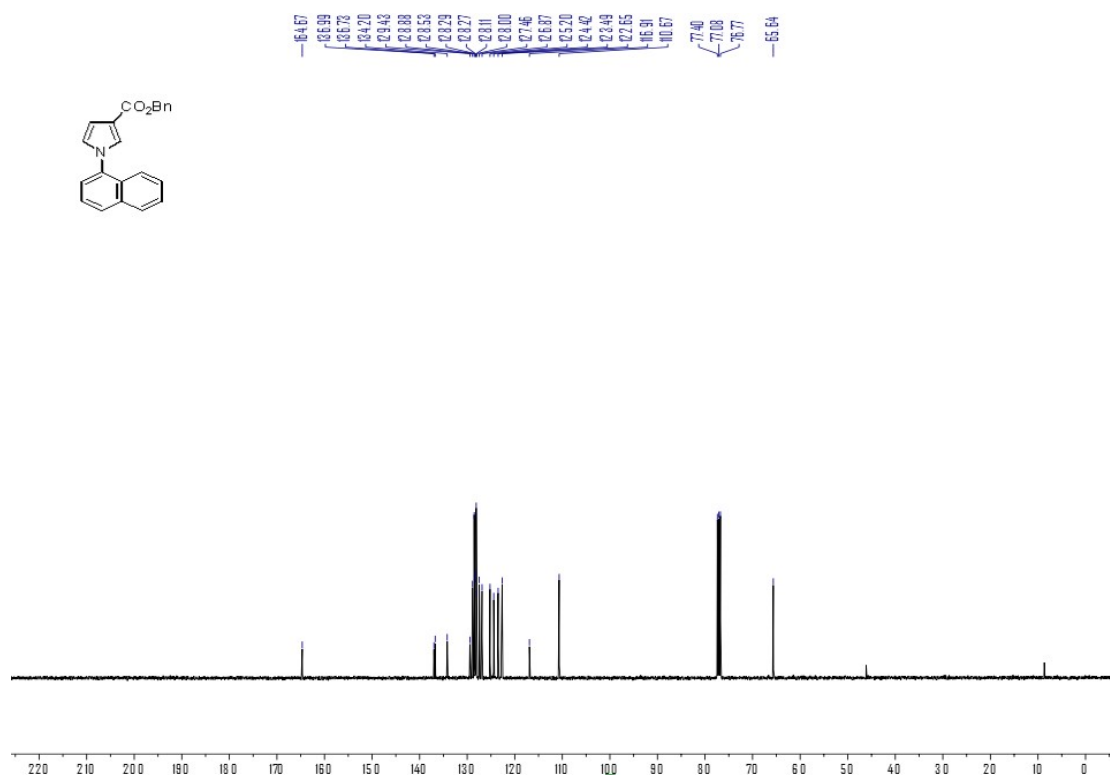

**Benzyl 1-(3,5-dichlorophenyl)-1H-pyrrole-3-carboxylate (3v)**

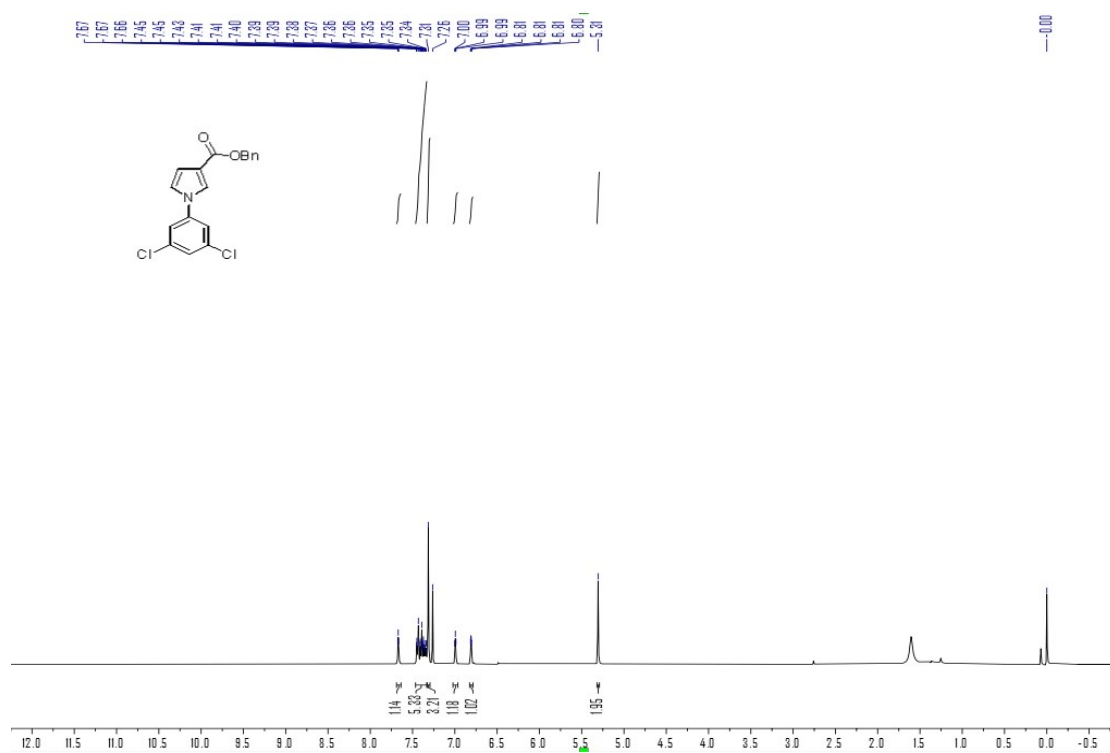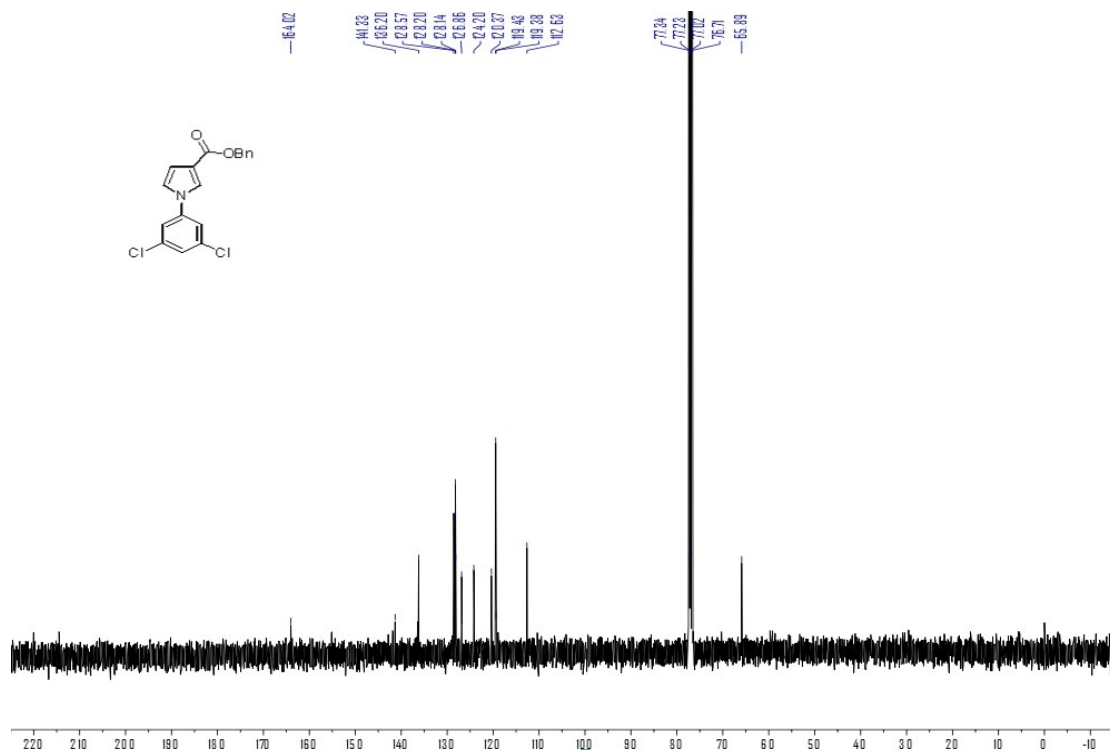

**Benzyl 1-(3,4,5-trimethylphenyl)-1H-pyrrole-3-carboxylate (3w)**

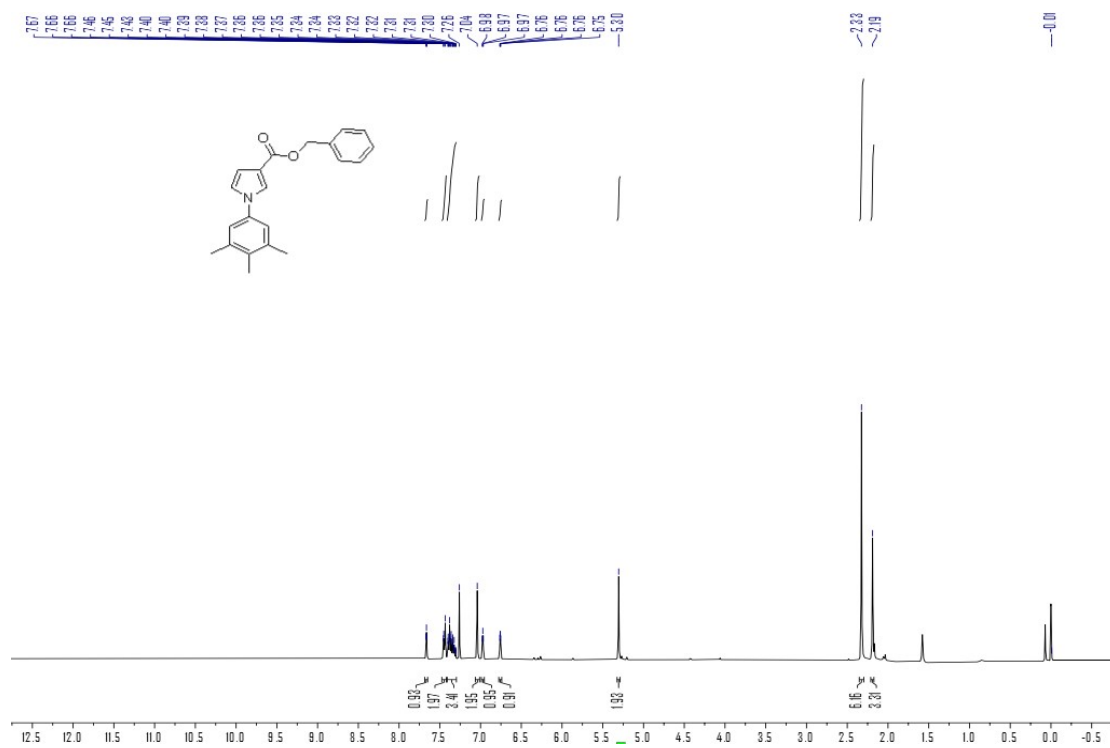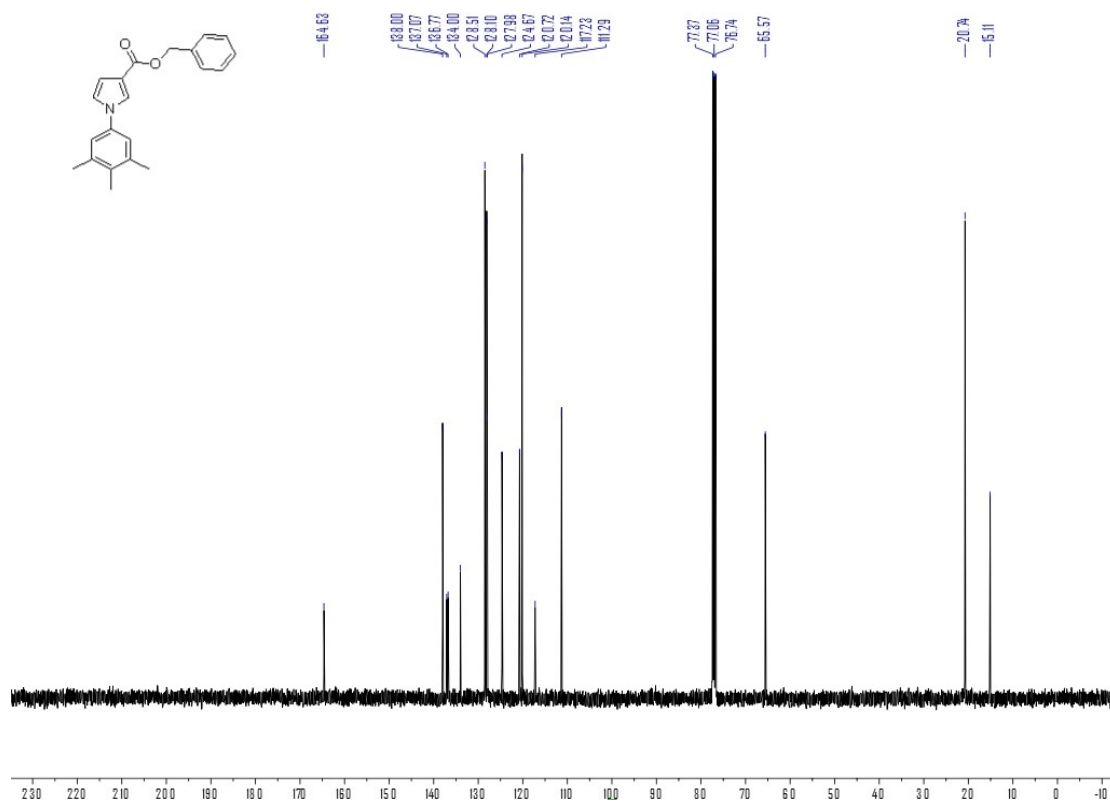

**Benzyl 1-(3,4,5-trimethoxyphenyl)-1H-pyrrole-3-carboxylate (3x)**

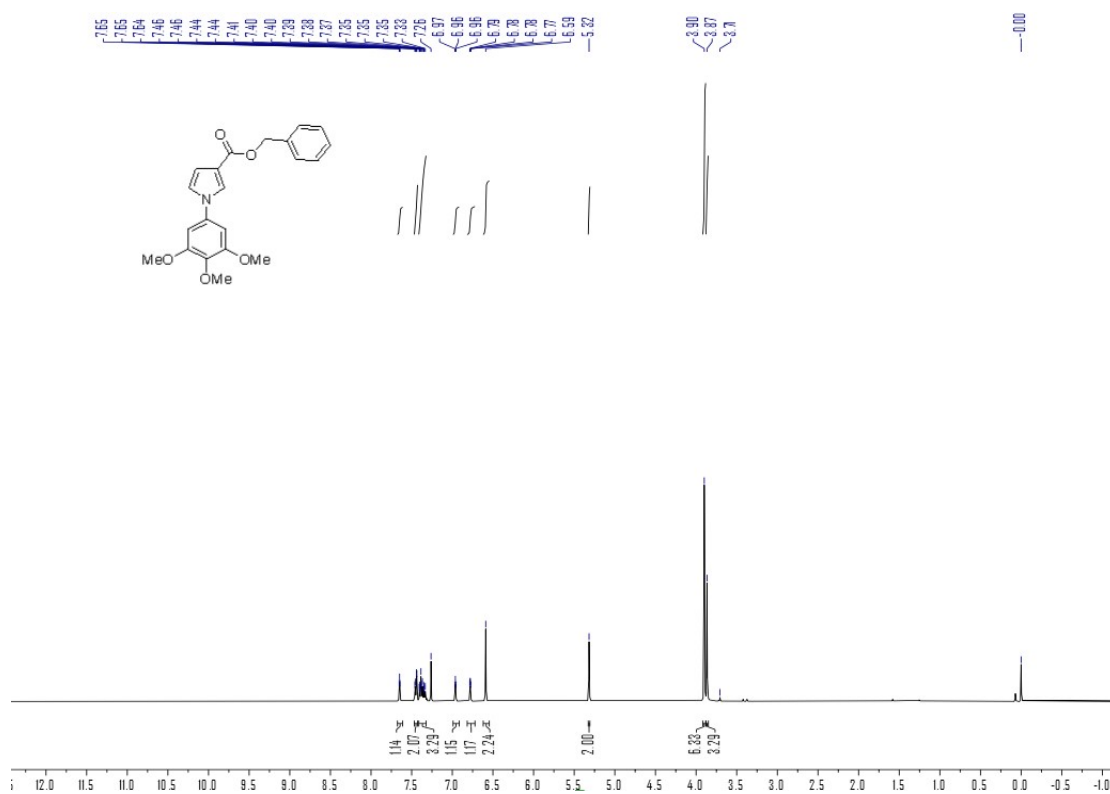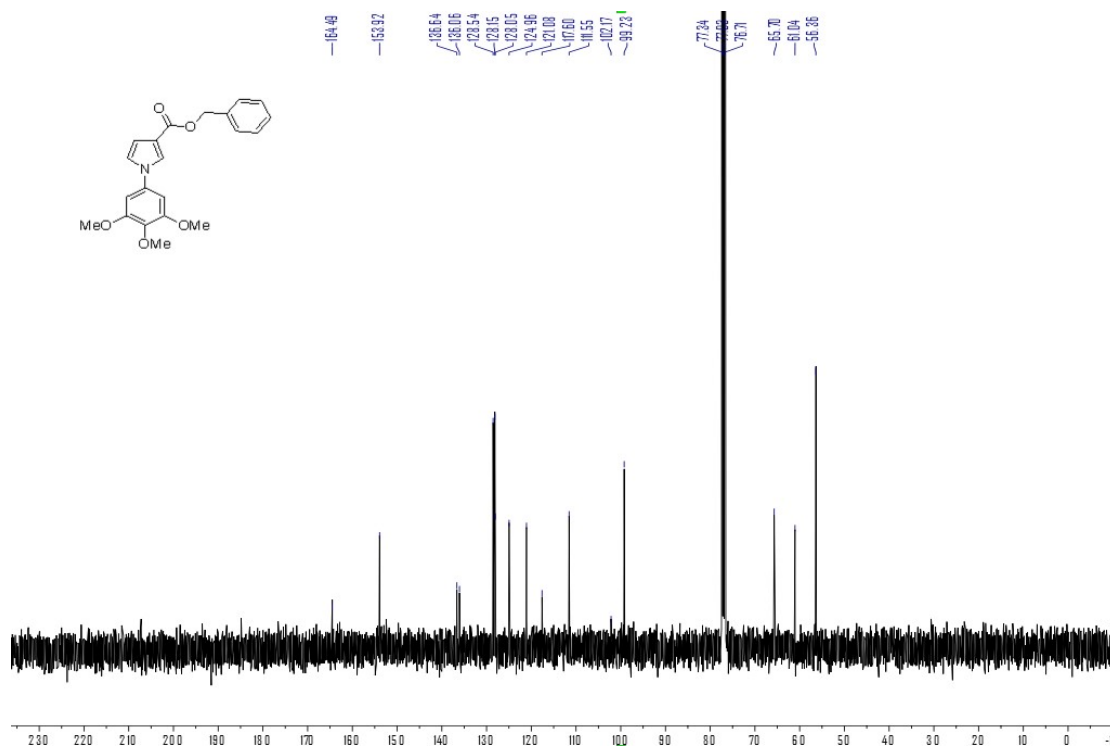

**Benzyl 1-(1H-indol-4-yl)-1H-pyrrole-3-carboxylate (3y)**

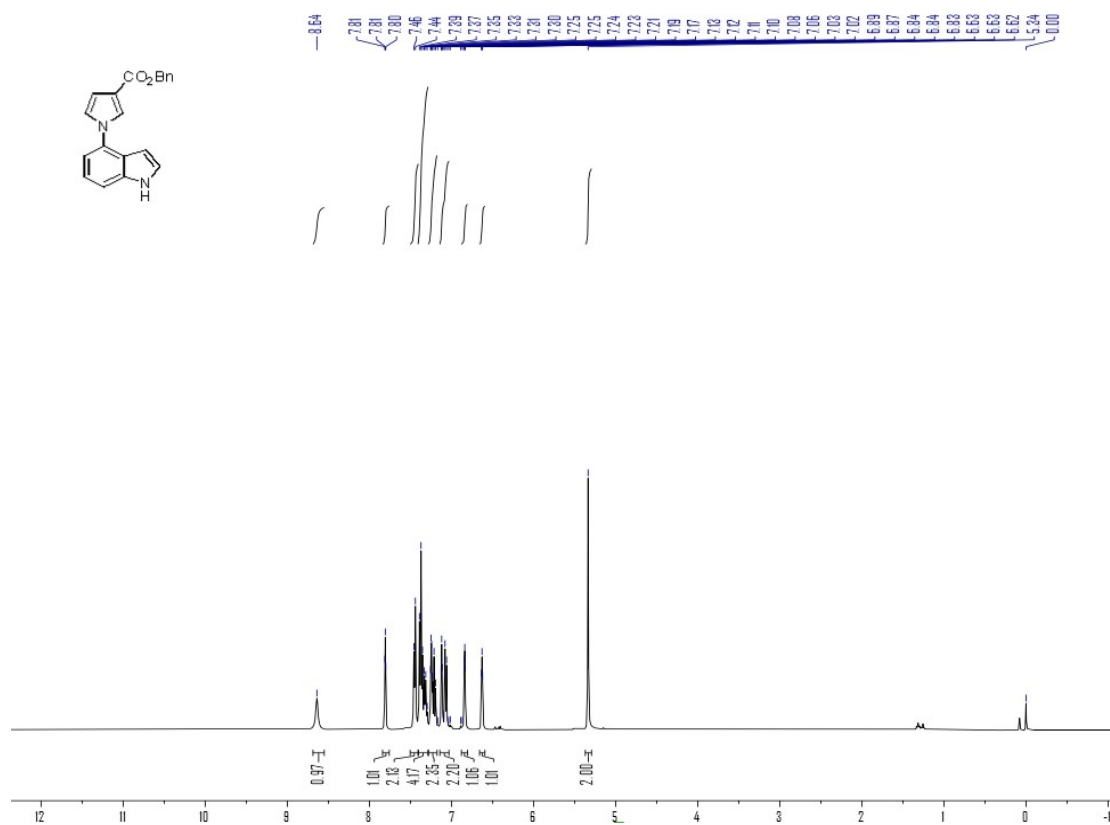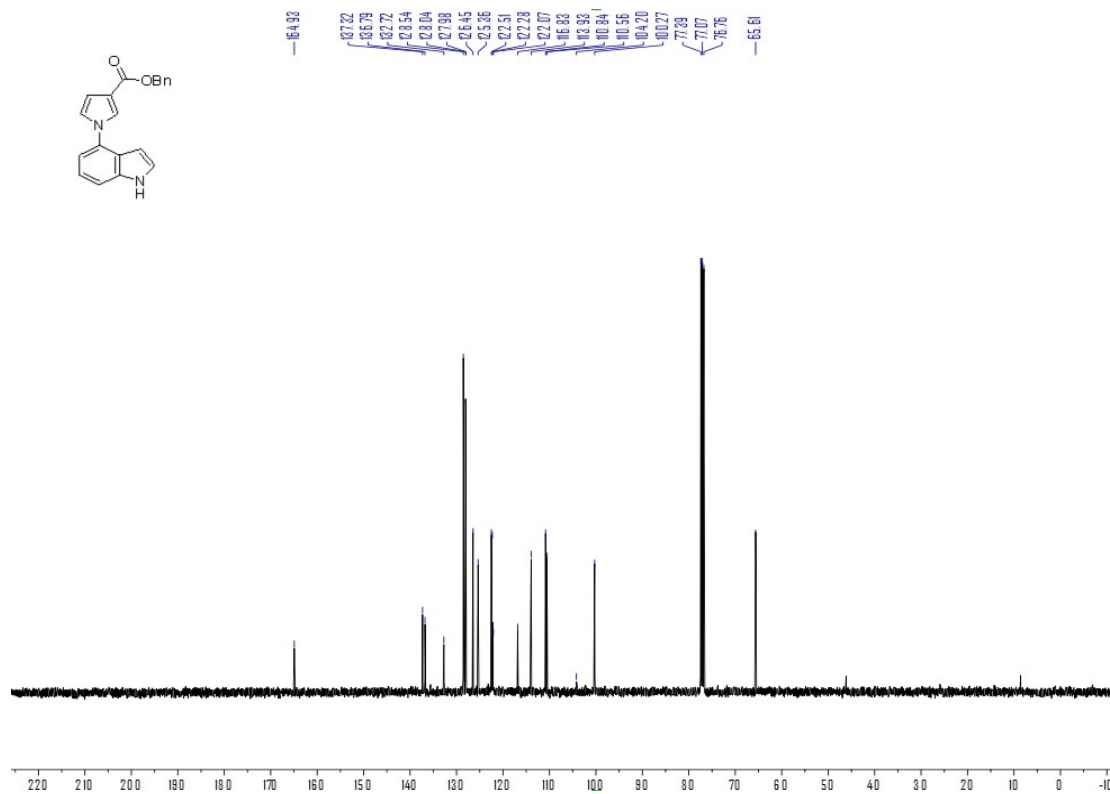

# Benzyl 1-benzyl-1H-pyrrole-3-carboxylate (3z)

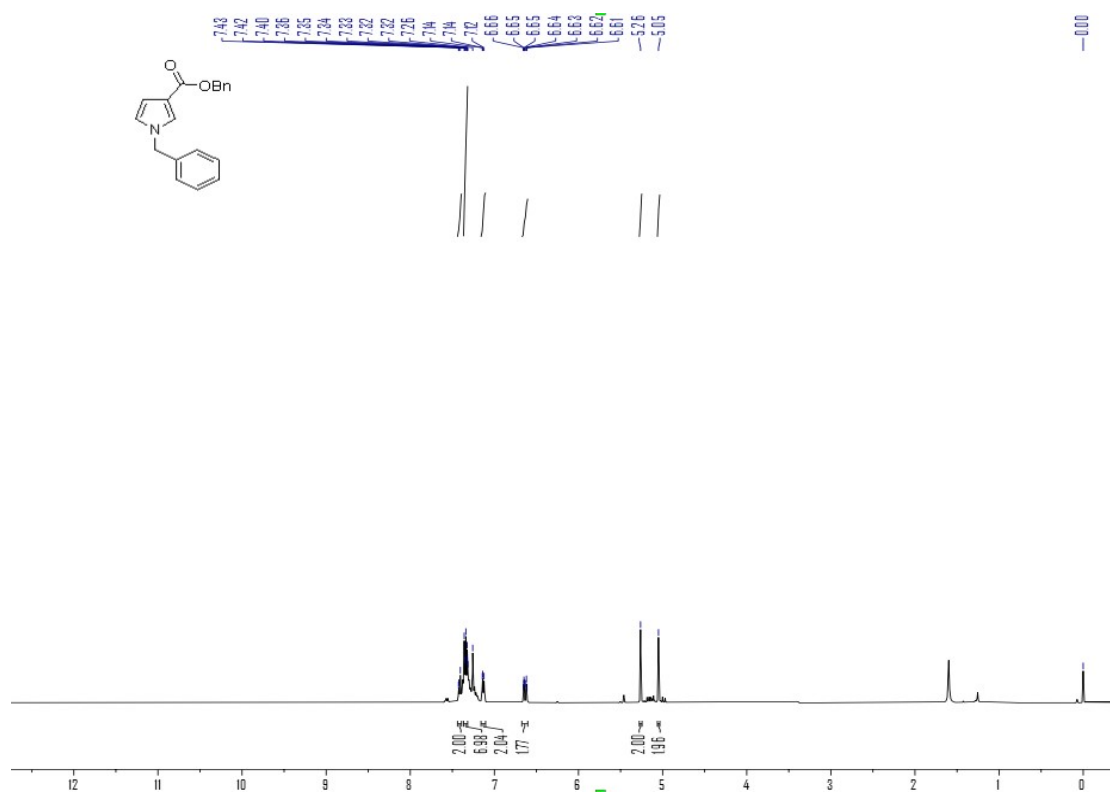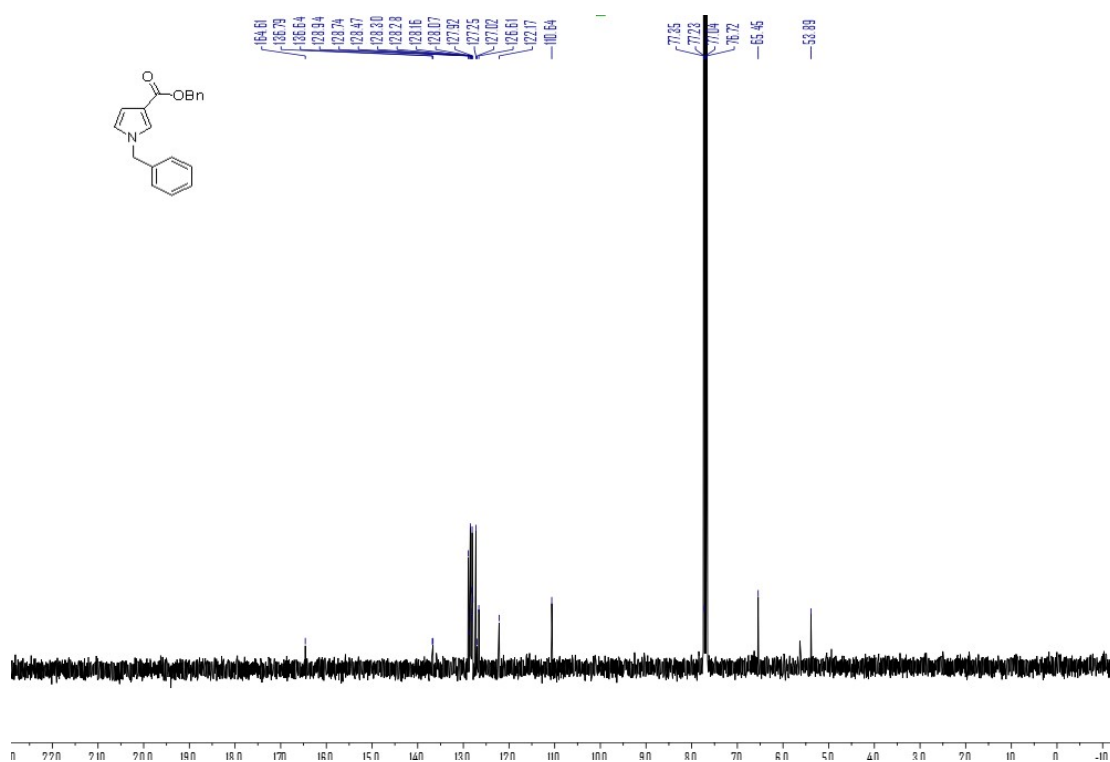

**Benzyl 1-butyl-1H-pyrrole-3-carboxylate (3aa)**

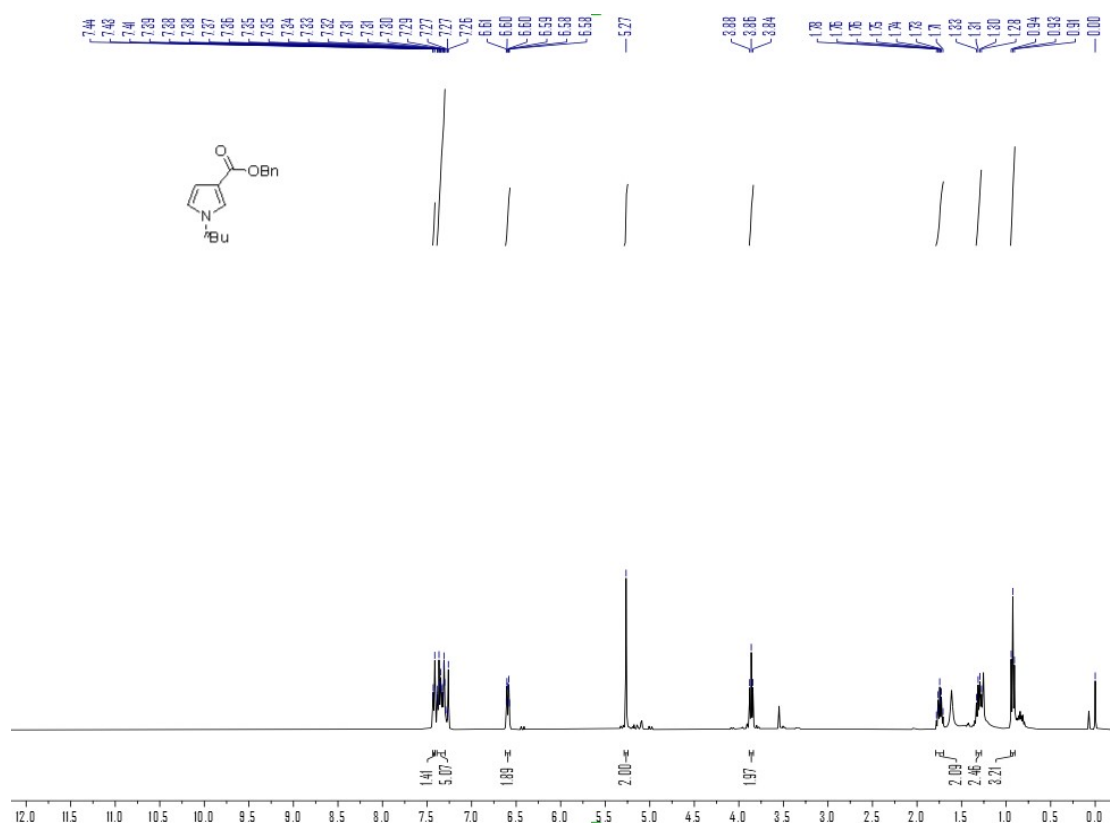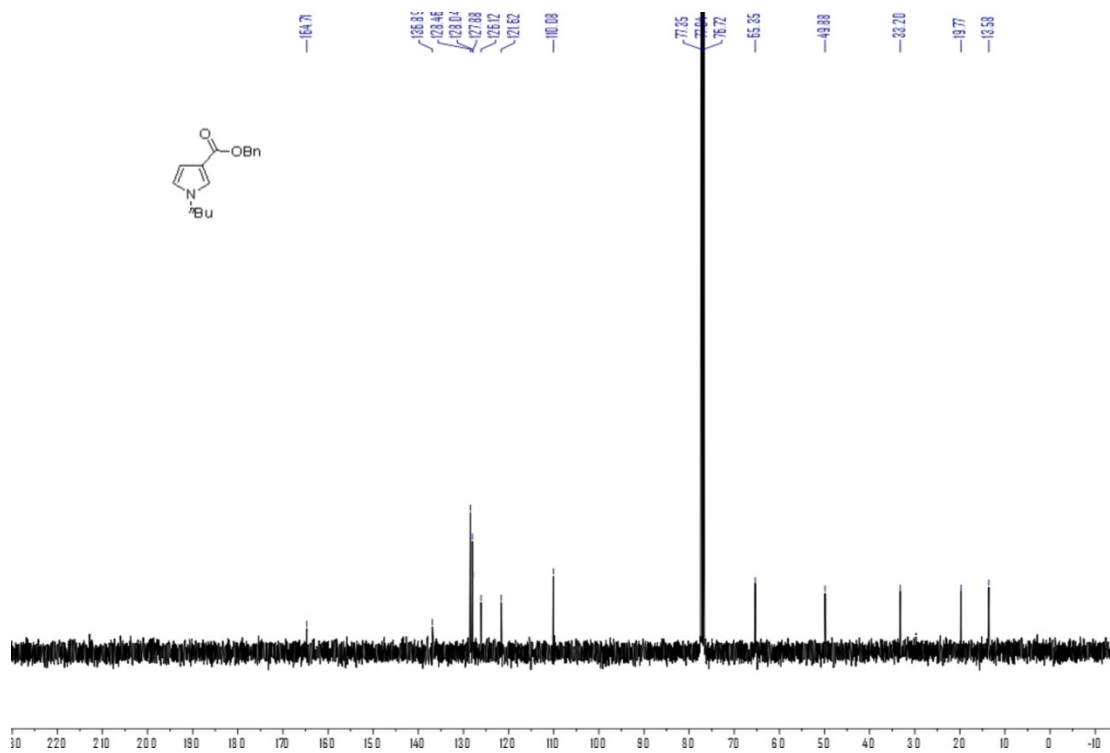



**Benzyl 1-pentyl-1*H*-pyrrole-3-carboxylate (3ab)**

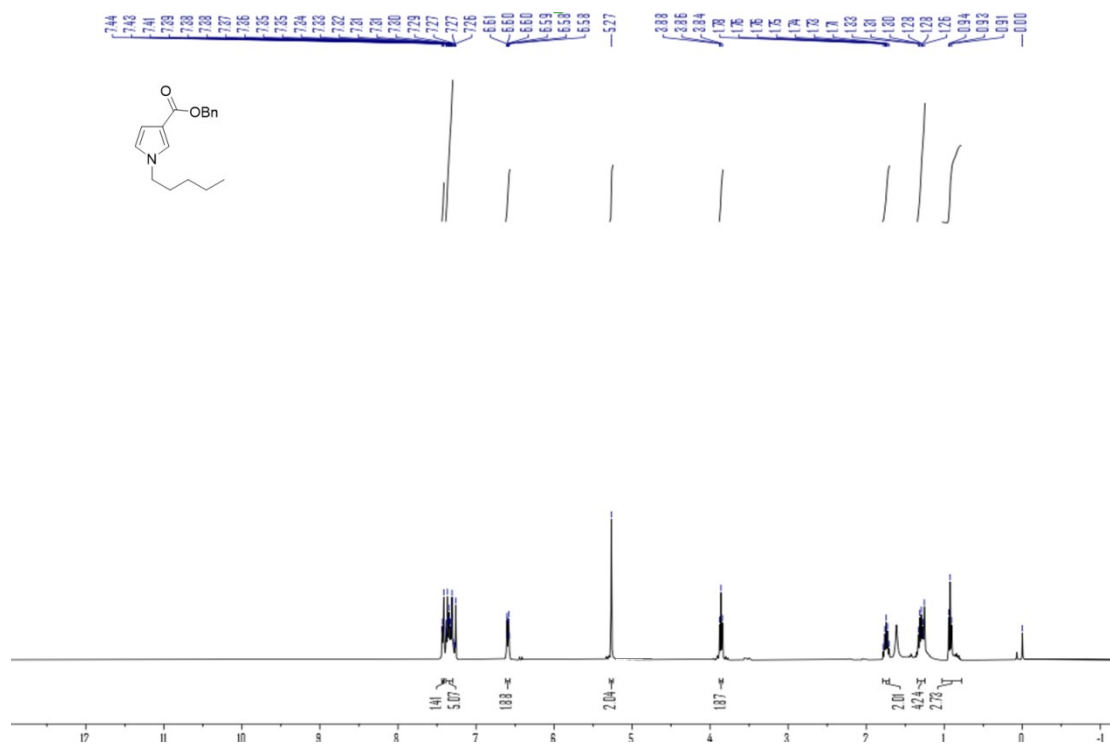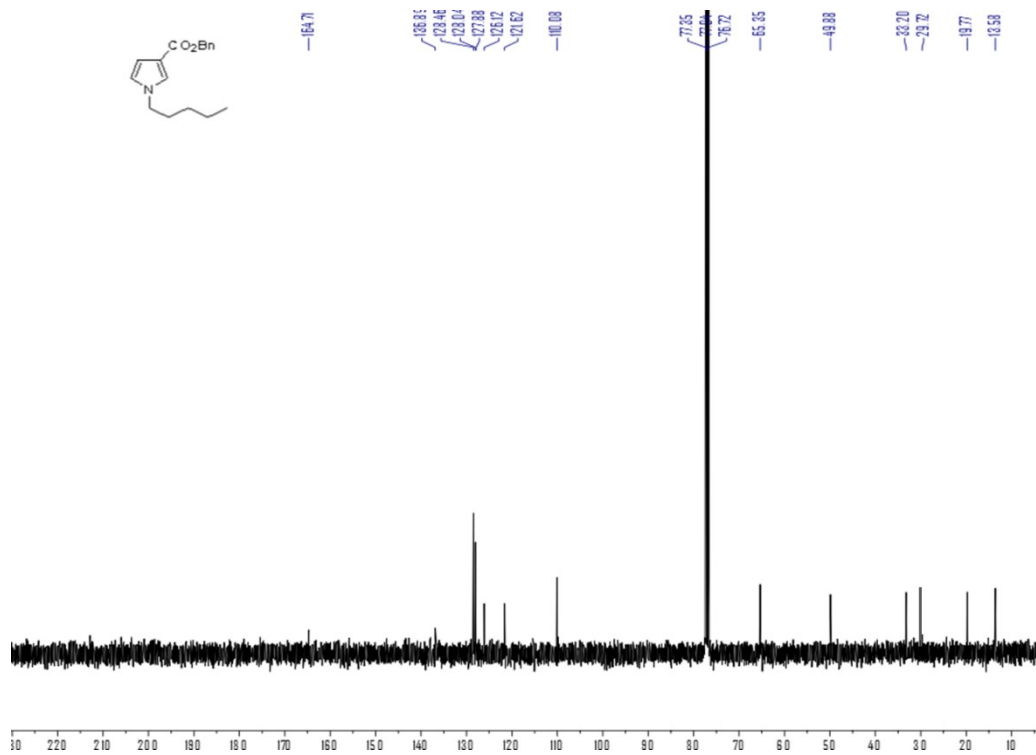



**Benzyl 1-hexadecyl-1H-pyrrole-3-carboxylate (3ad)**

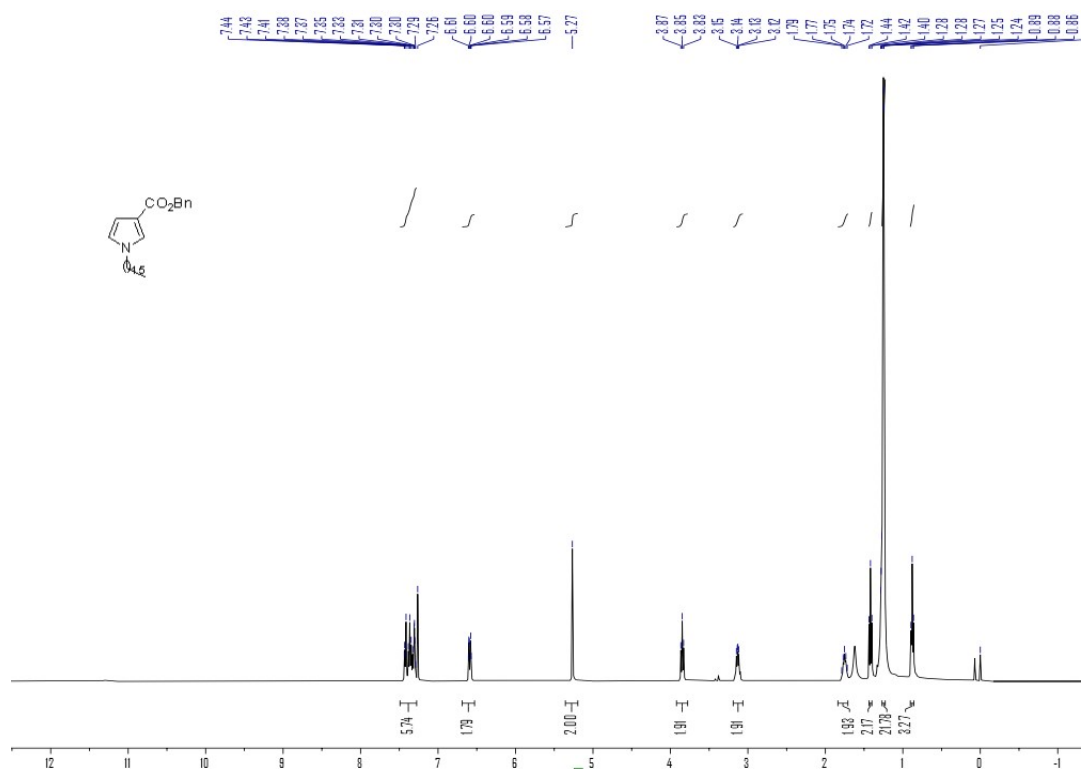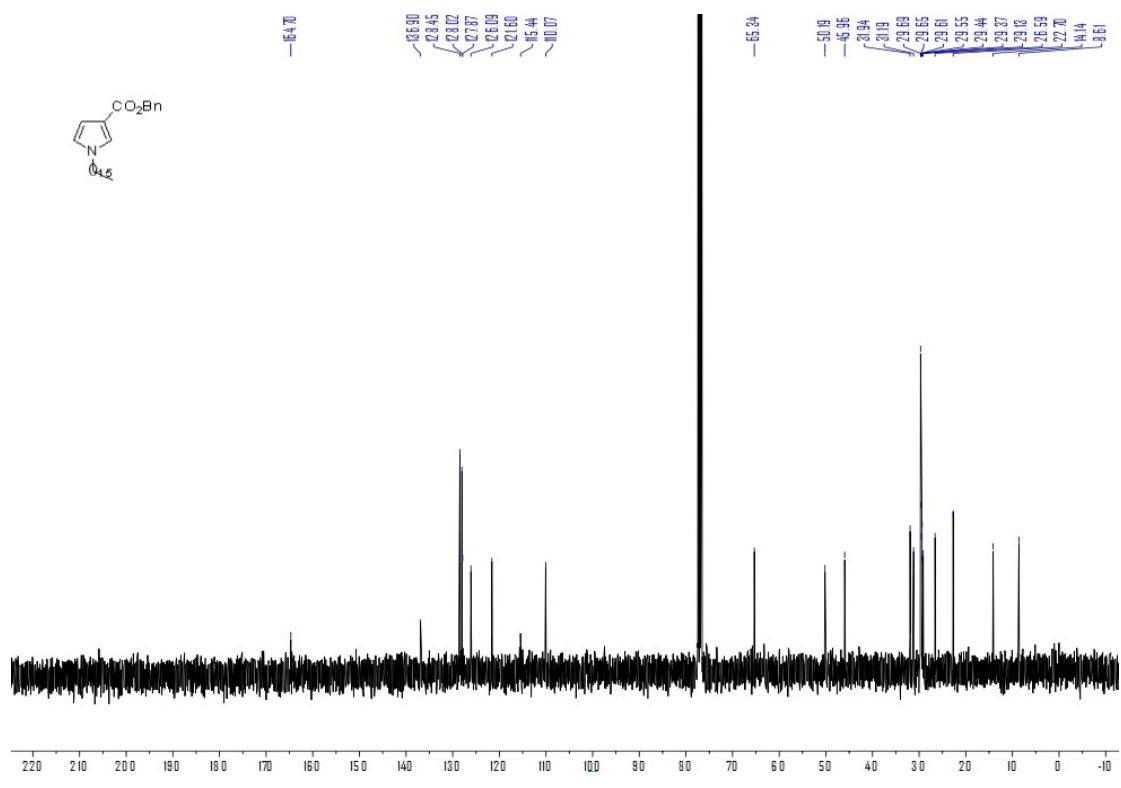

**Benzyl 1-cyclohexyl-1H-pyrrole-3-carboxylate (3ae)**

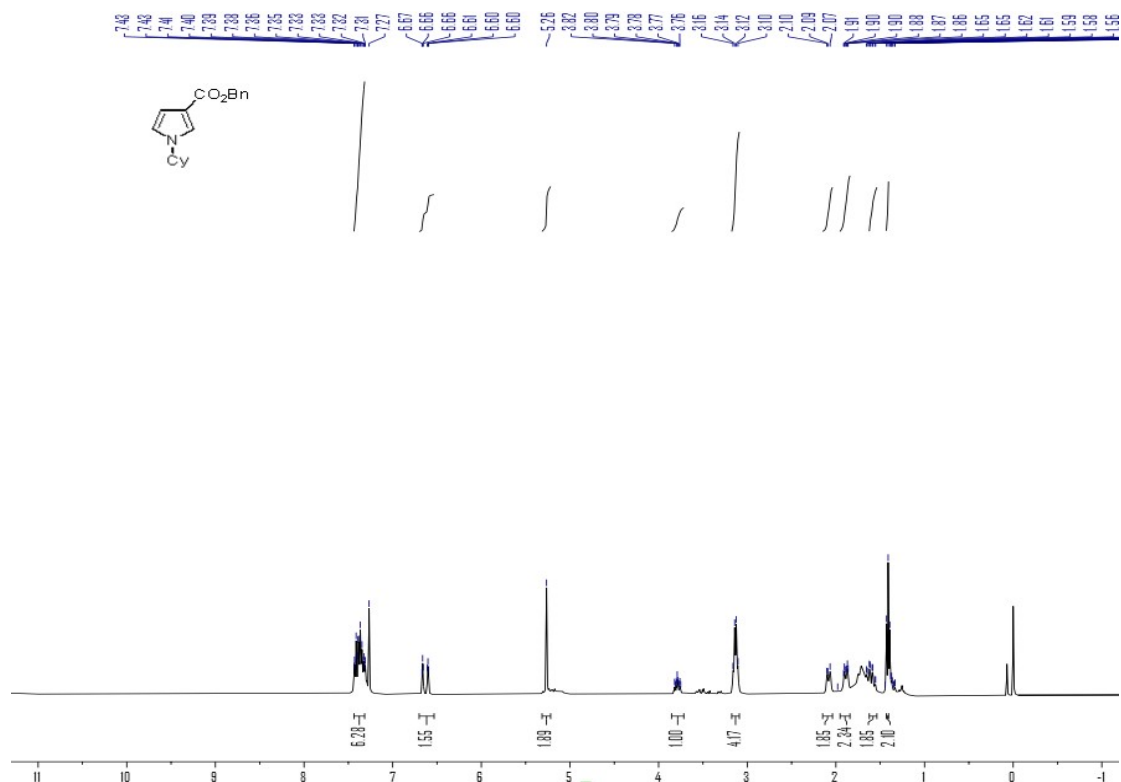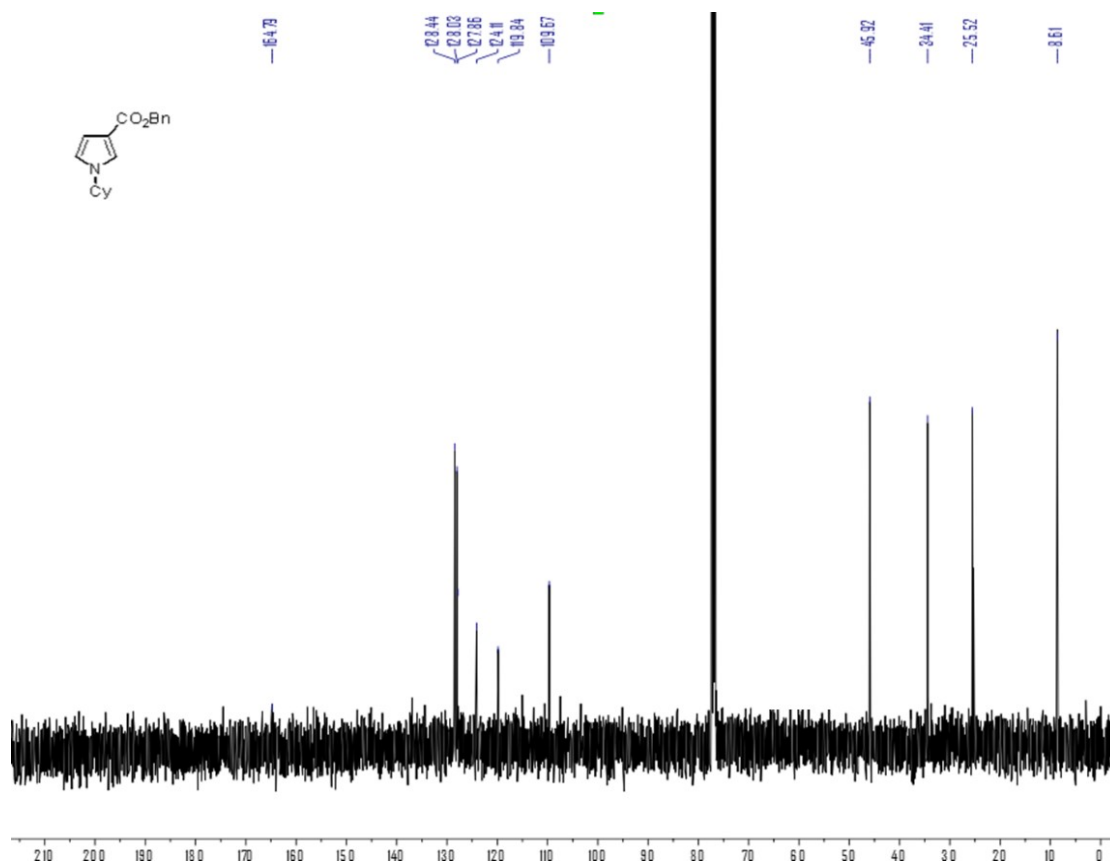

**Benzyl 1-(tert-butyl)-1H-pyrrole-3-carboxylate (3af)**

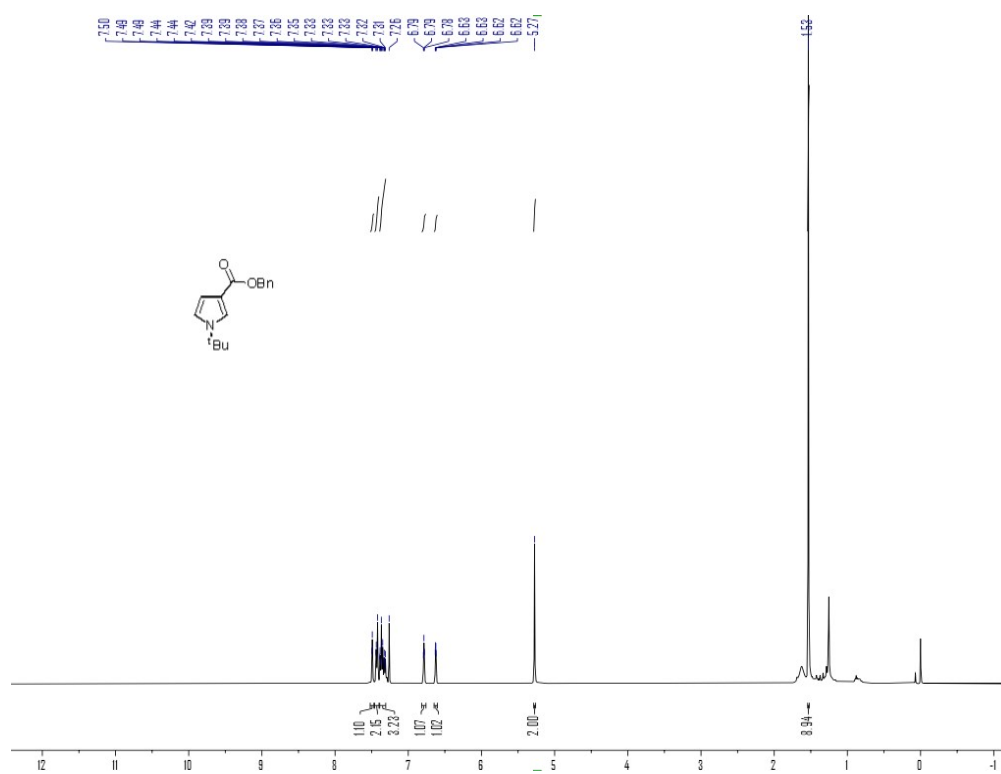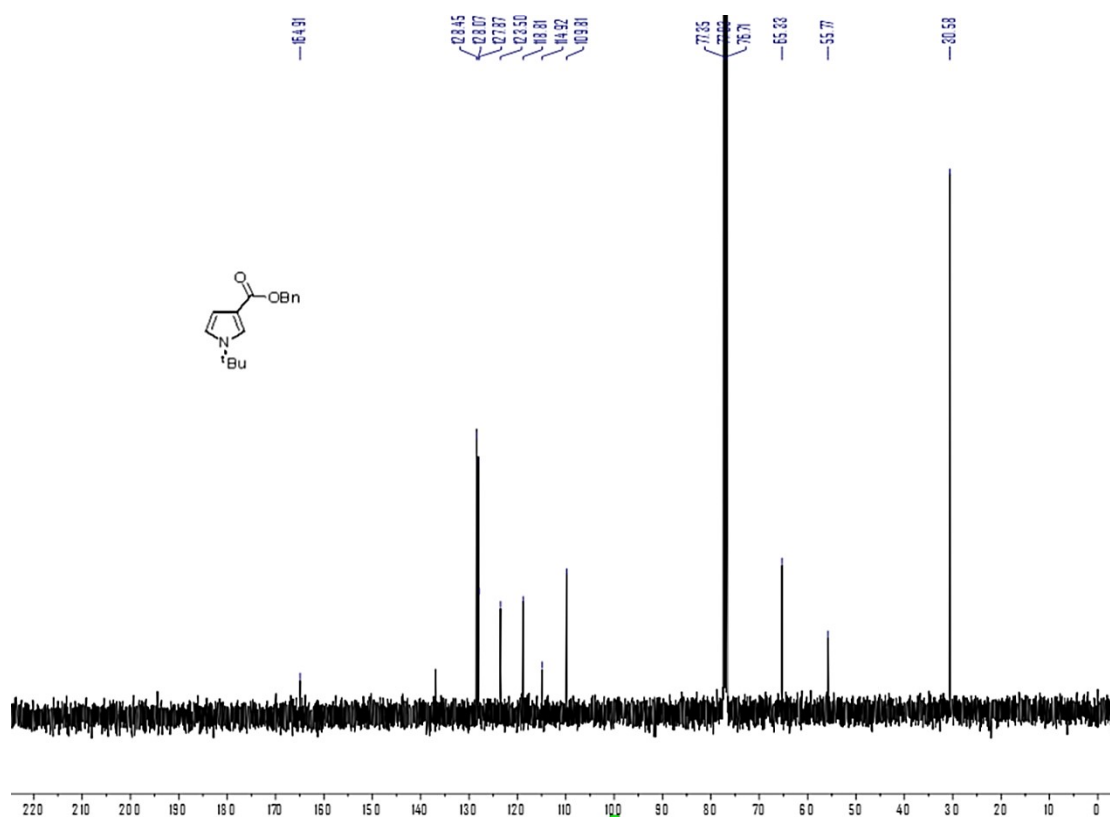

**Benzyl 1-(3-(1H-indol-3-yl)-1-methoxy-1-oxopropan-2-yl)-1H-pyrrole-3-carboxylate (3ag)**

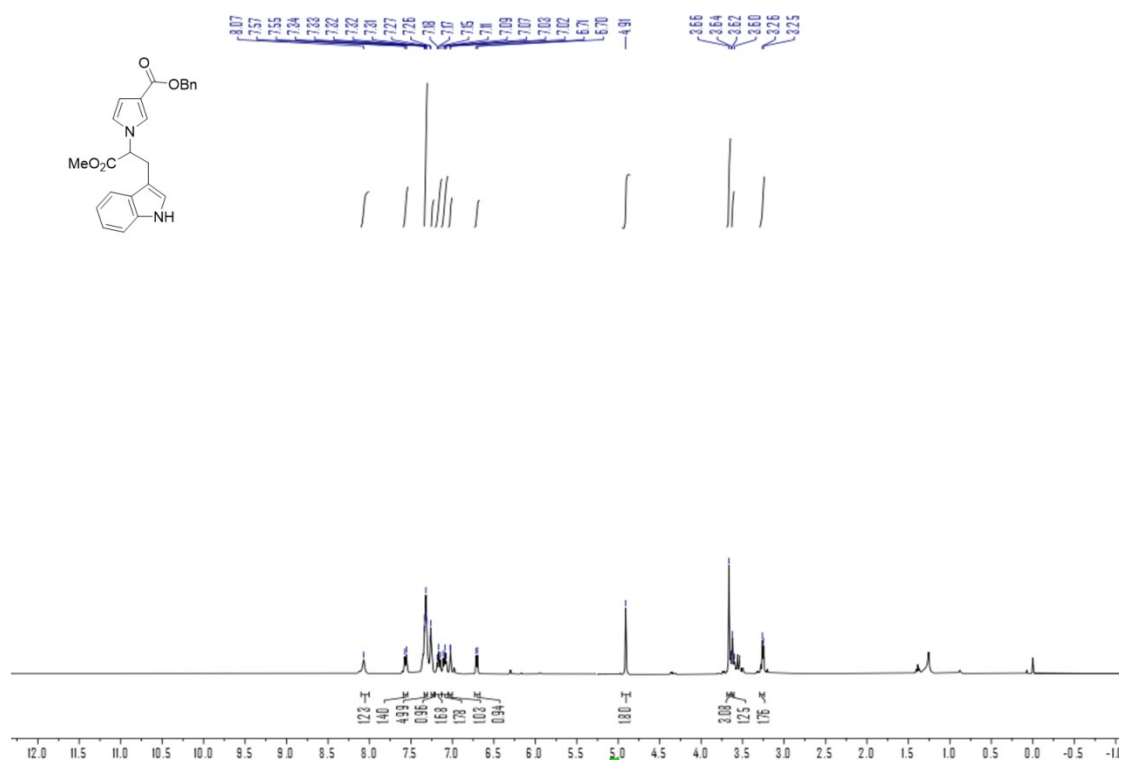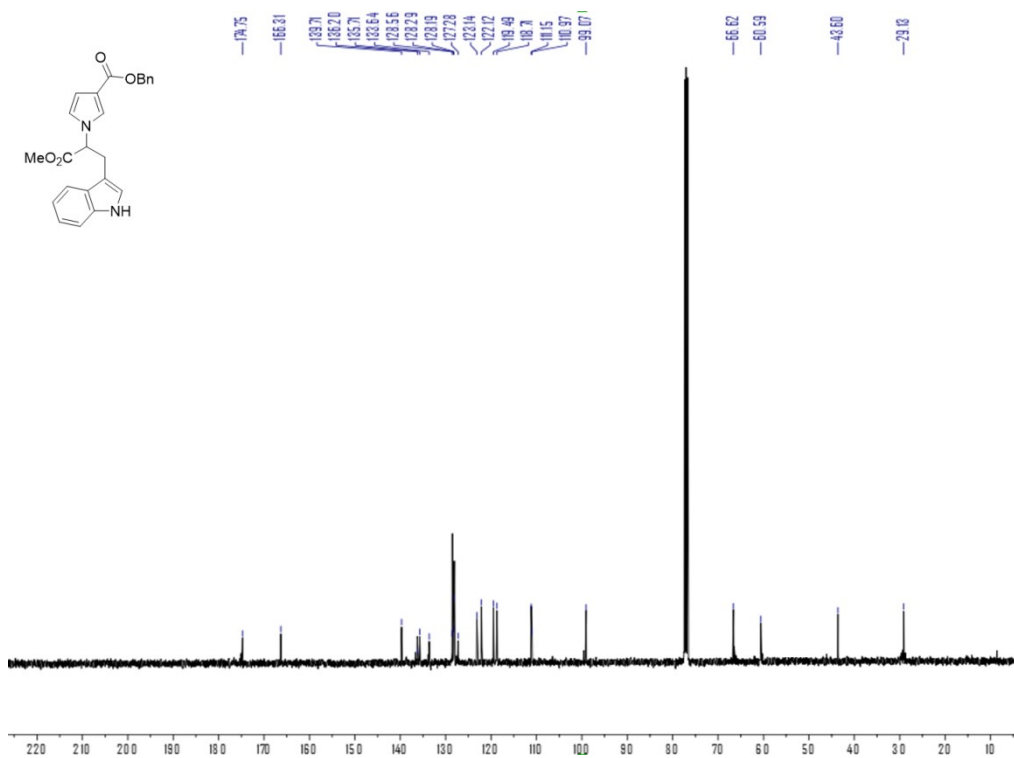

### Ethyl 1-phenyl-1H-pyrrole-3-carboxylate (3ah)

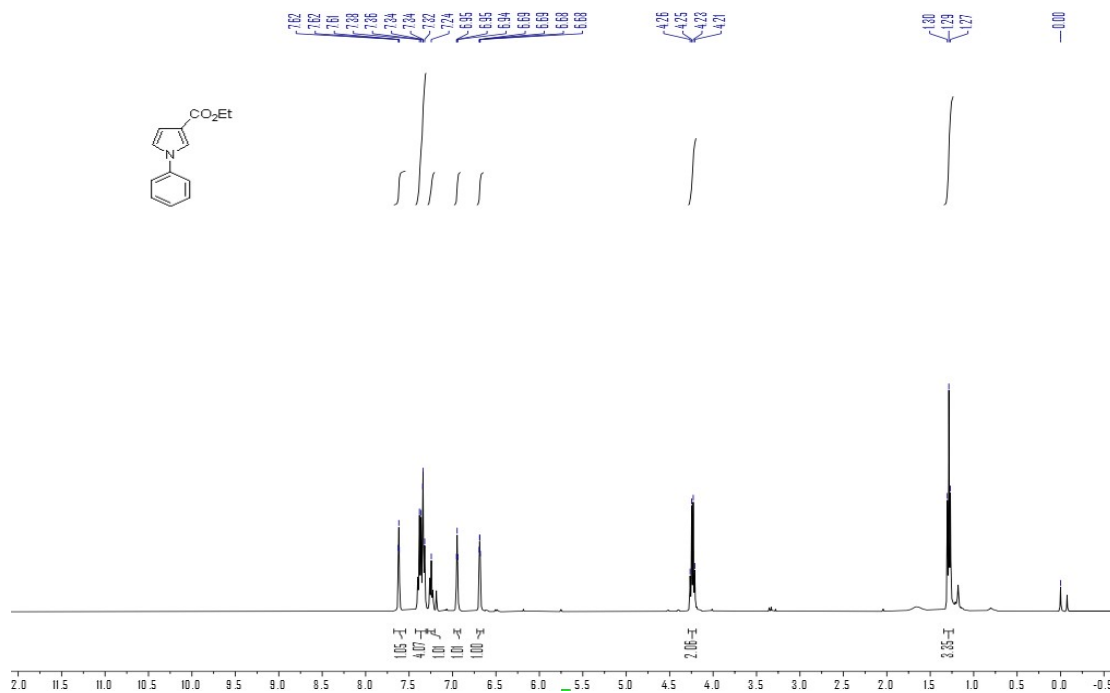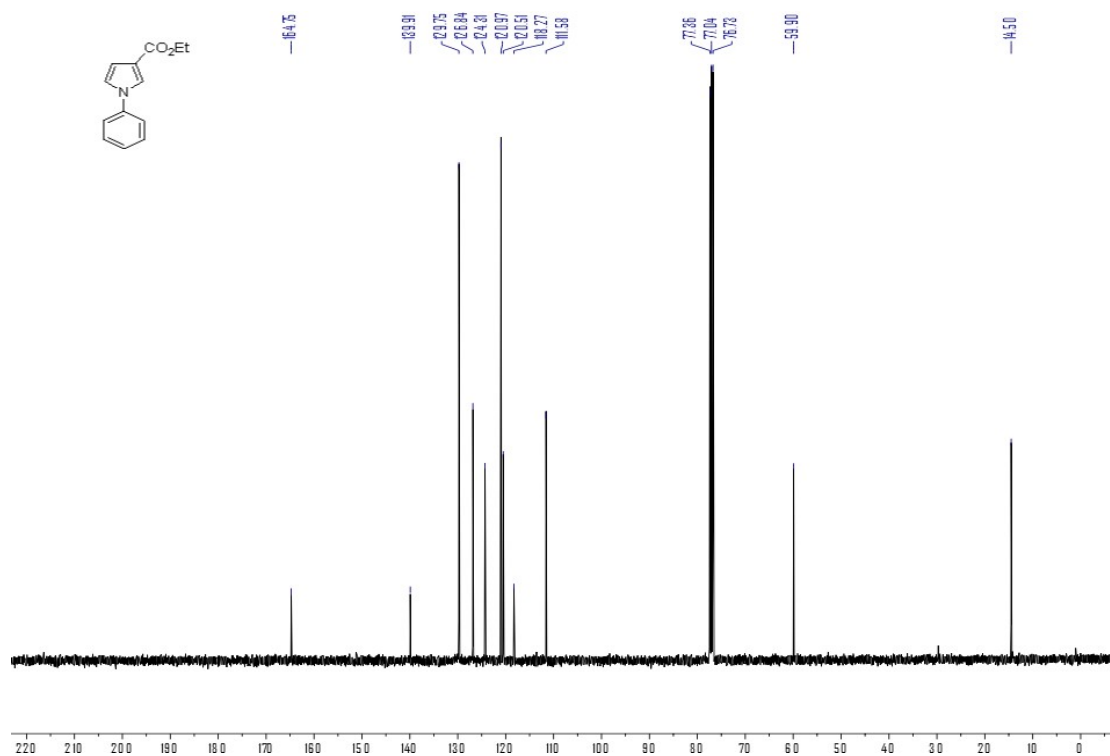

Ethyl 1-benzyl-1H-pyrrole-3-carboxylate (3ai)

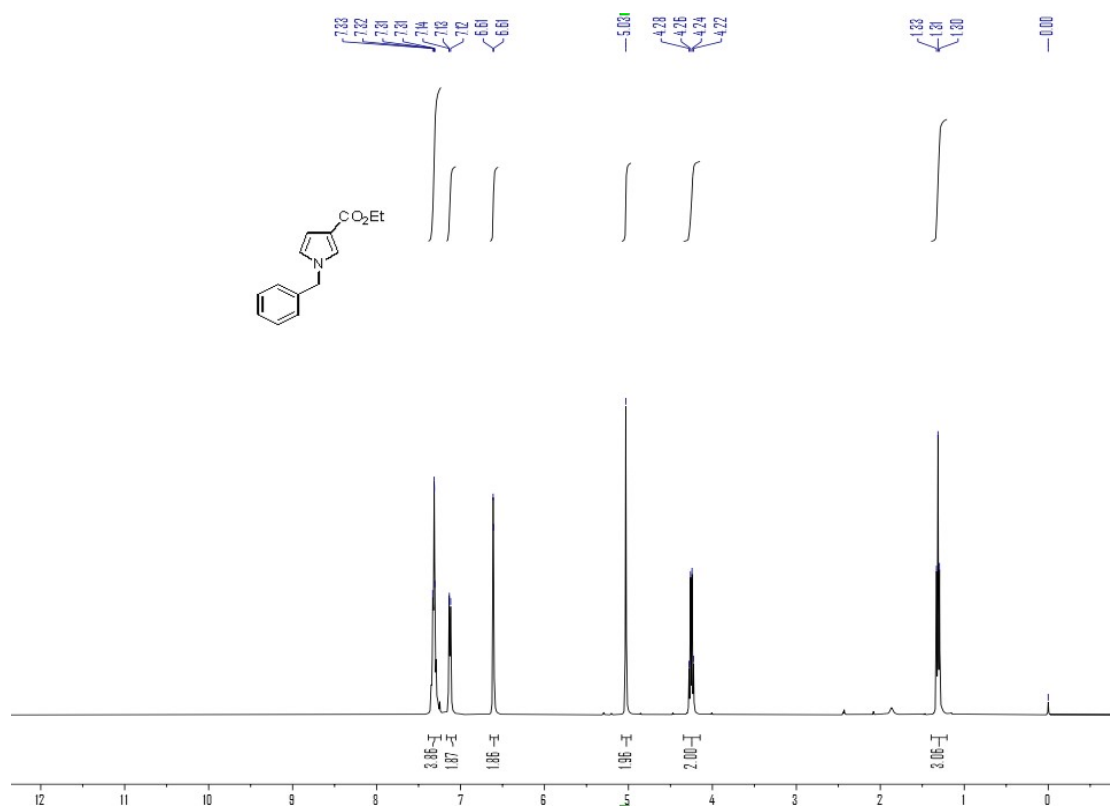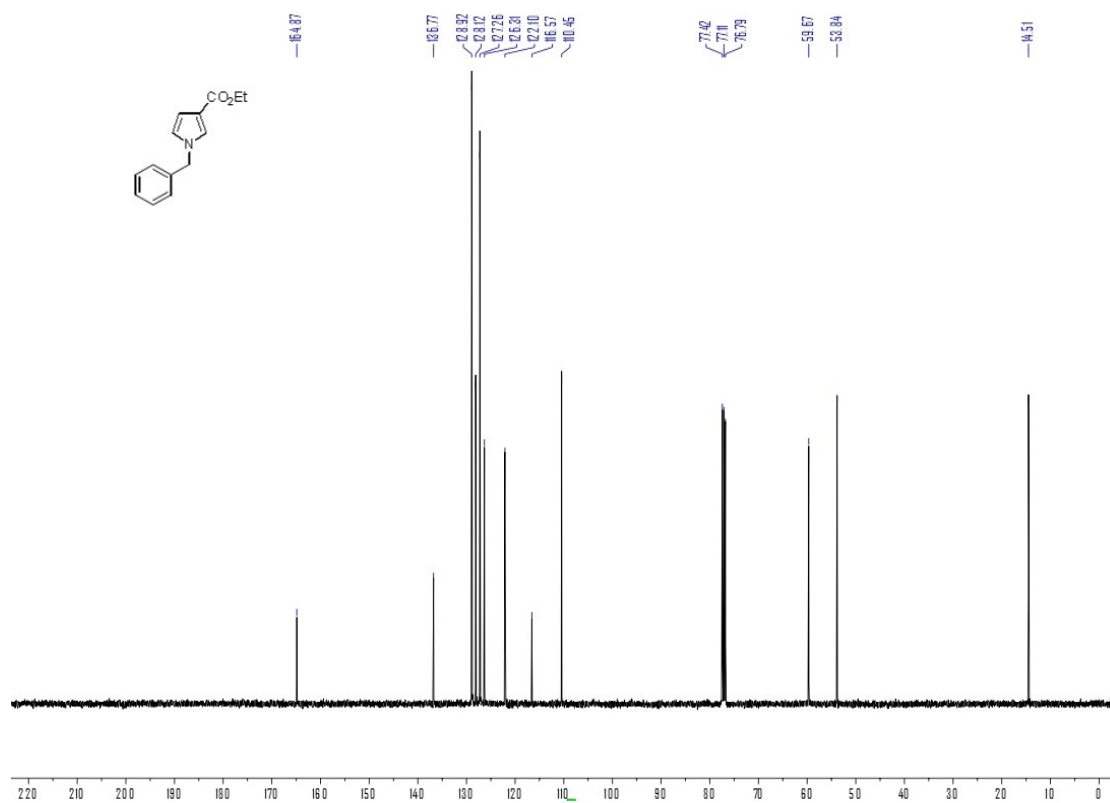



**(1-(3,5-Difluoro-4-methoxyphenyl)-1H-pyrrol-3-yl)(phenyl)methanone (3aj)**

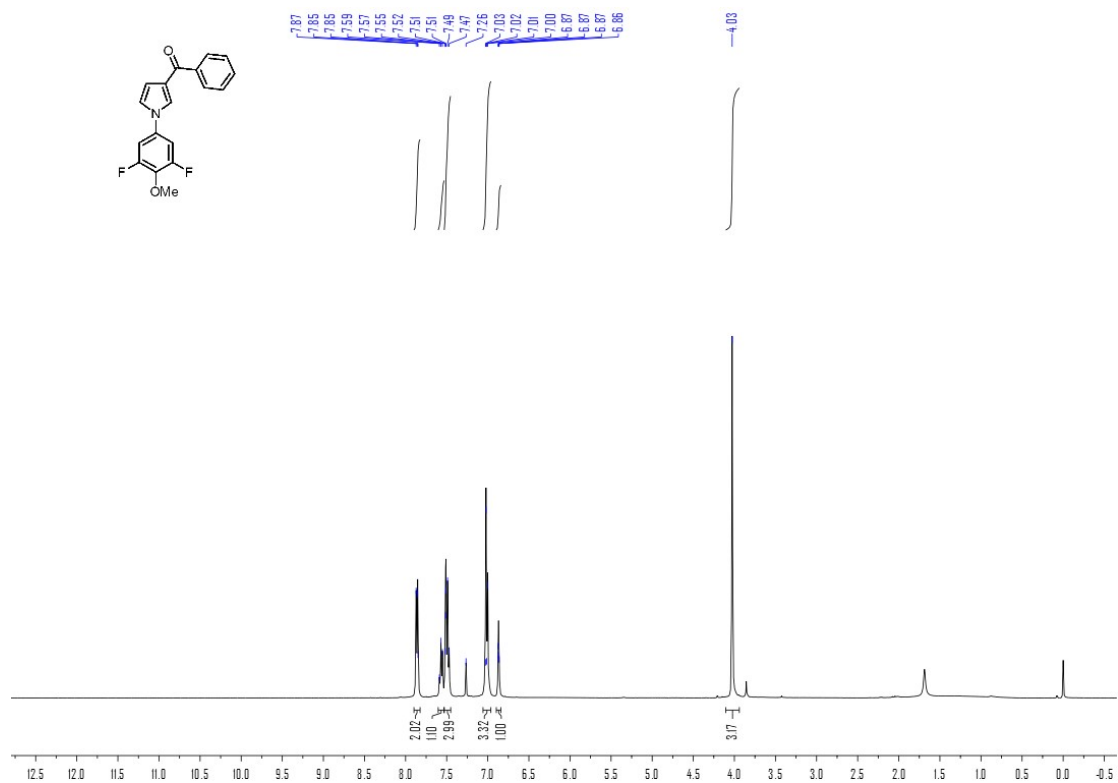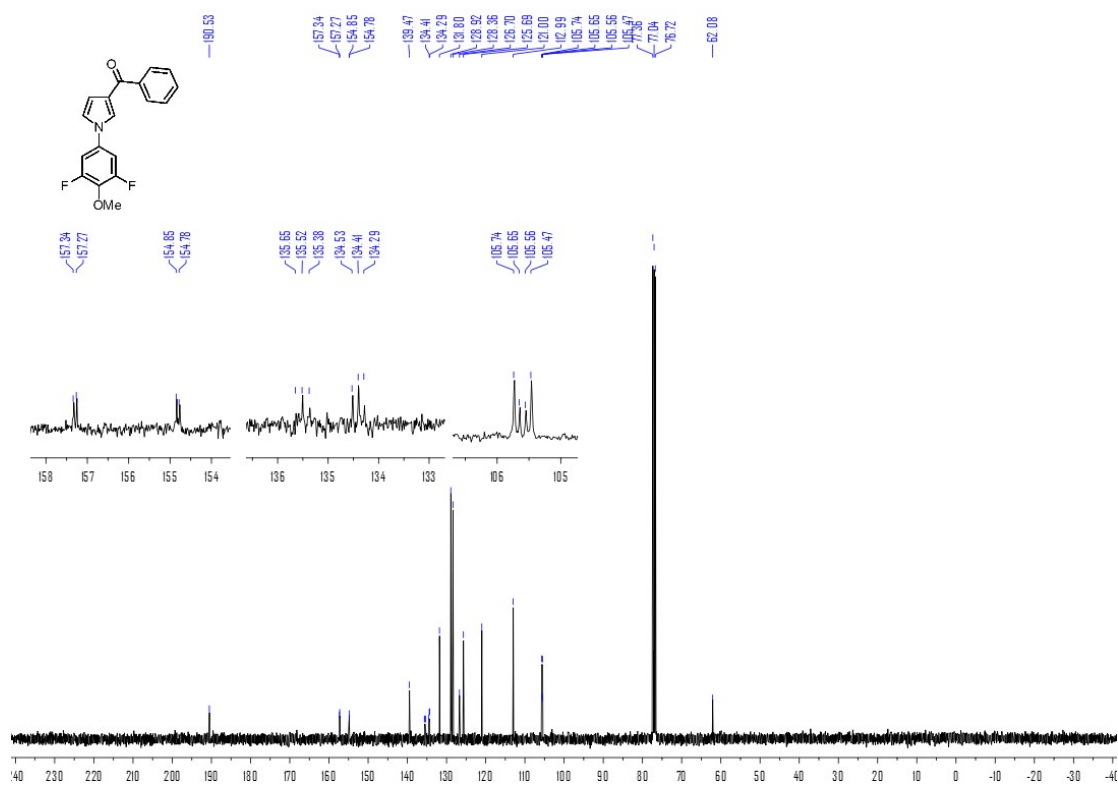

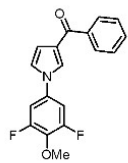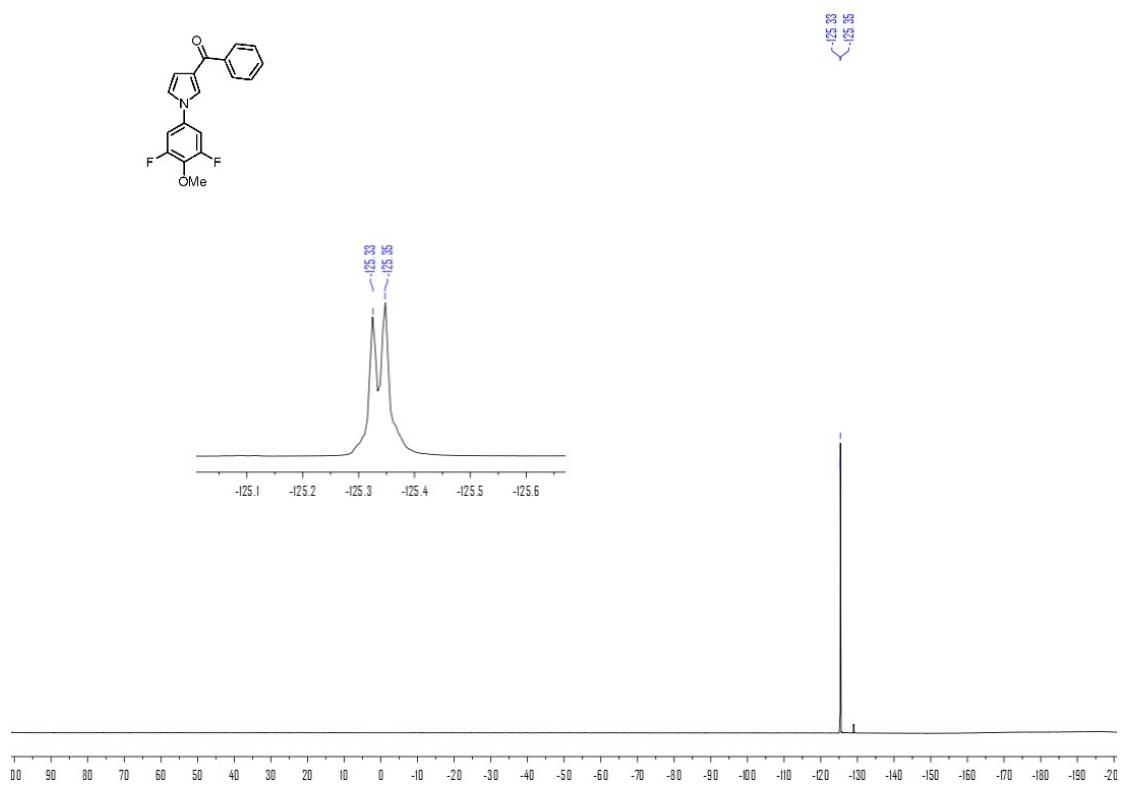

# Phenyl(1-phenyl-1H-pyrrol-3-yl)methanone (3ak)

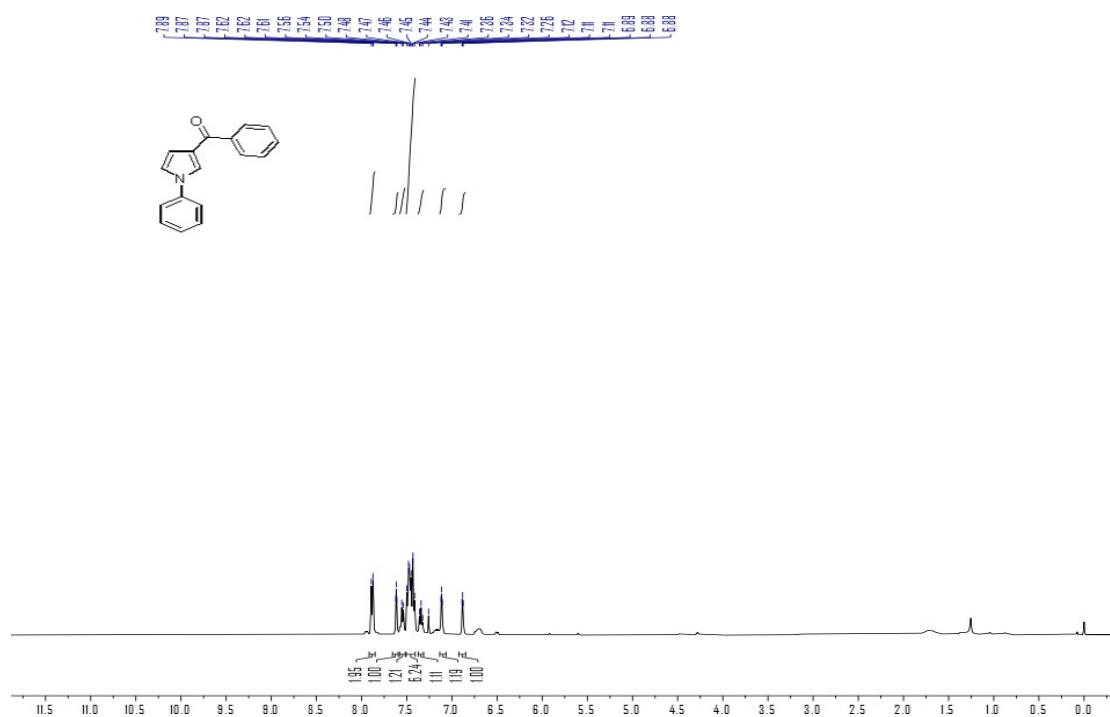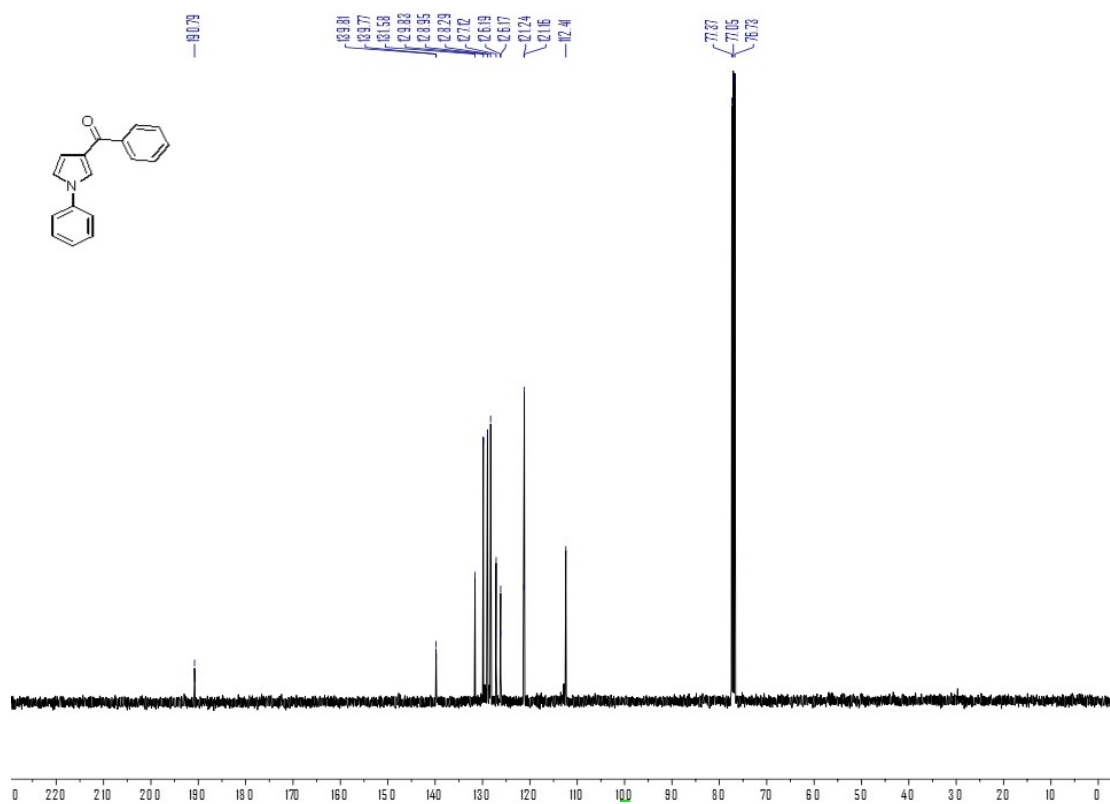

Naphthalen-1-yl(1-pentyl-1H-pyrrol-3-yl)methanone (3aI, JWH-030)

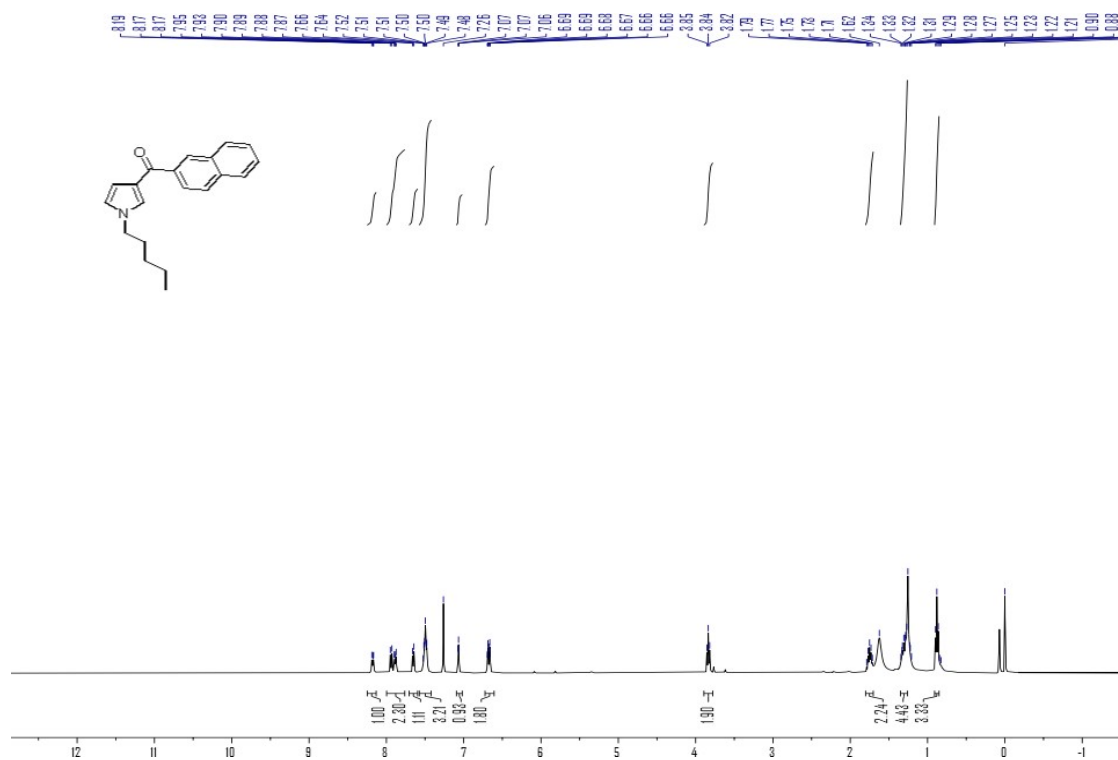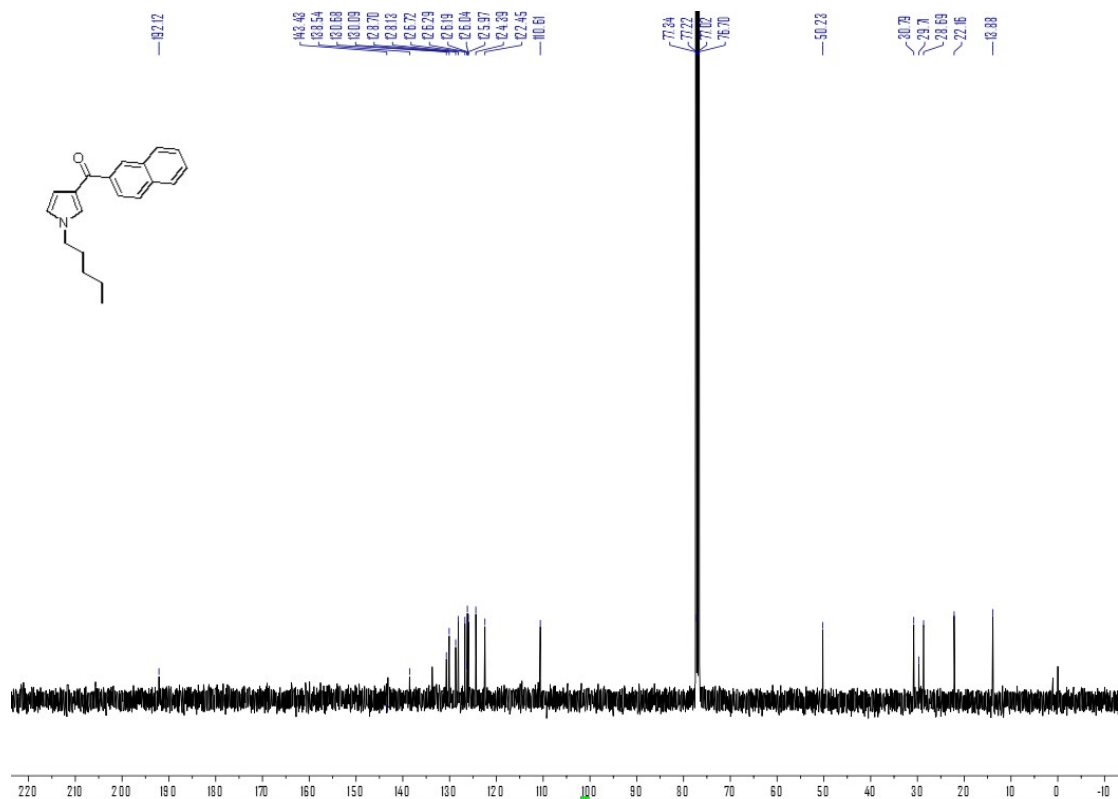

1-(3-Hydroxyphenyl)-1H-pyrrole-3-carboxamide (JMC-2004)

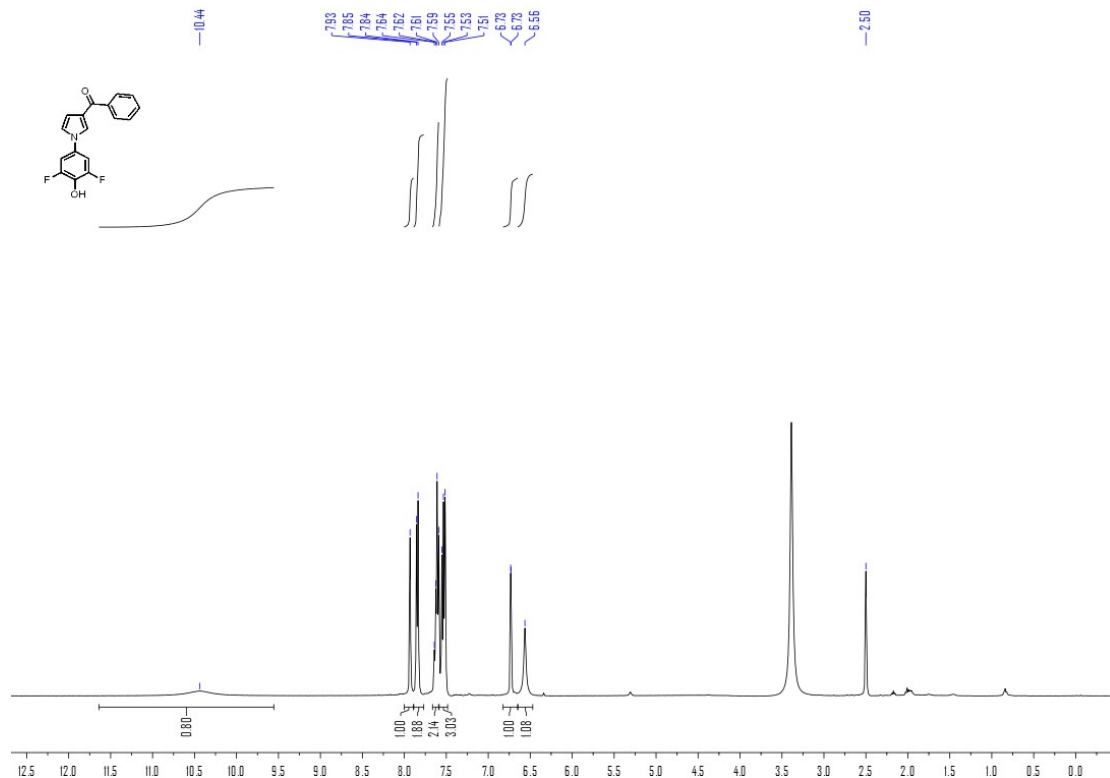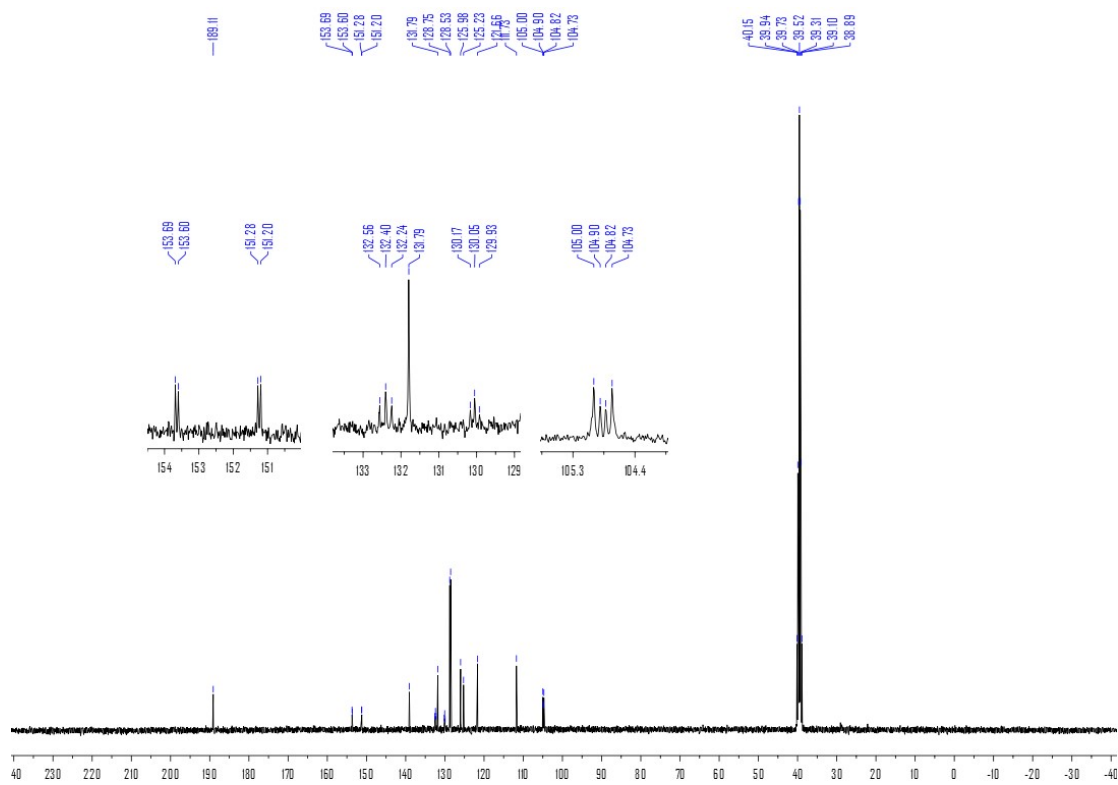

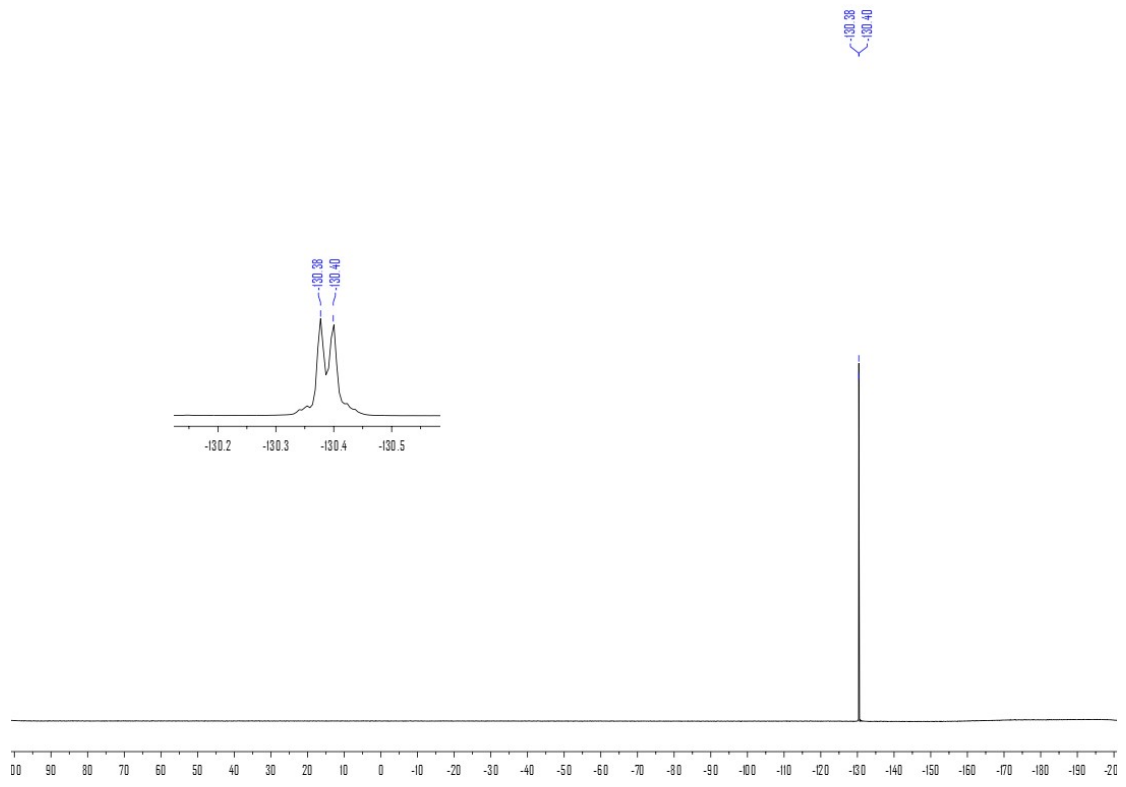

(1-(3,5-Difluoro-4-hydroxyphenyl)-1H-pyrrol-3-yl)(phenyl)methanon (4a)

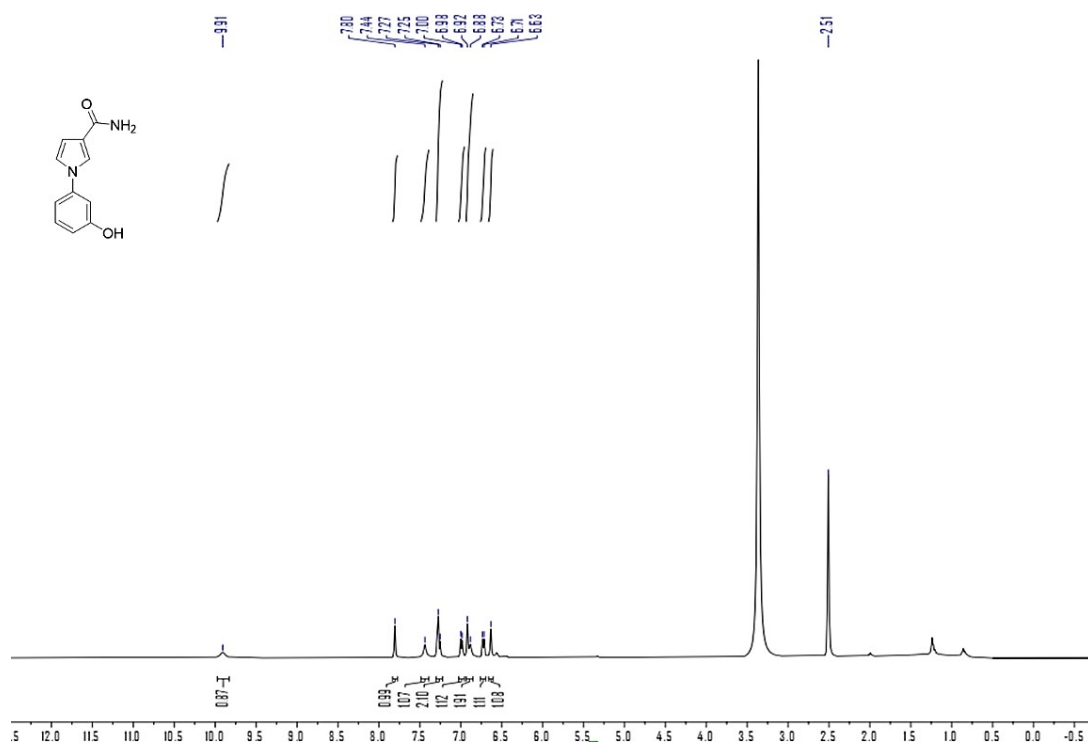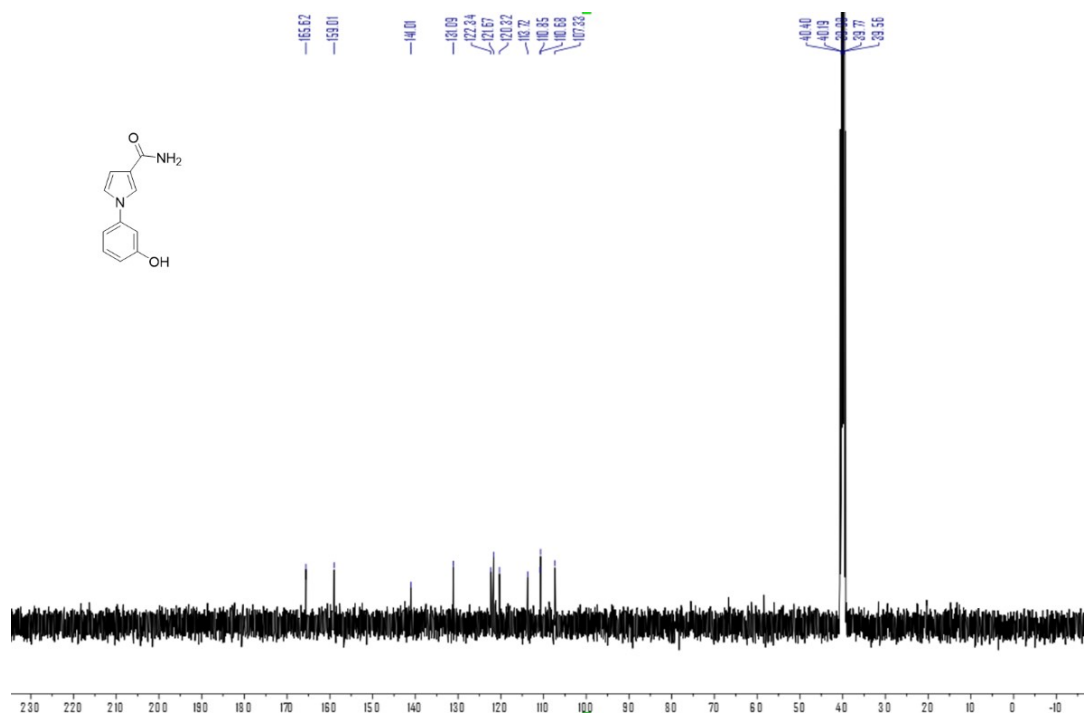

# Ethyl 1-benzyl-1H-indole-3-carboxylate (5a)

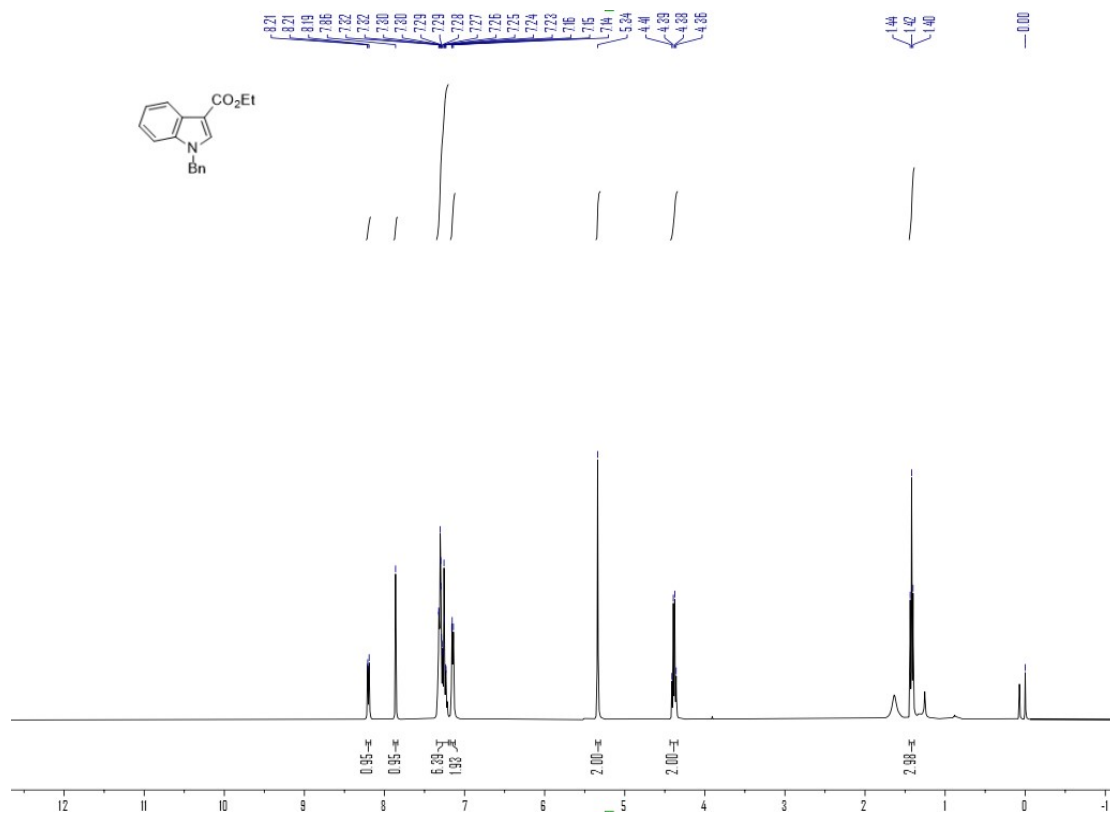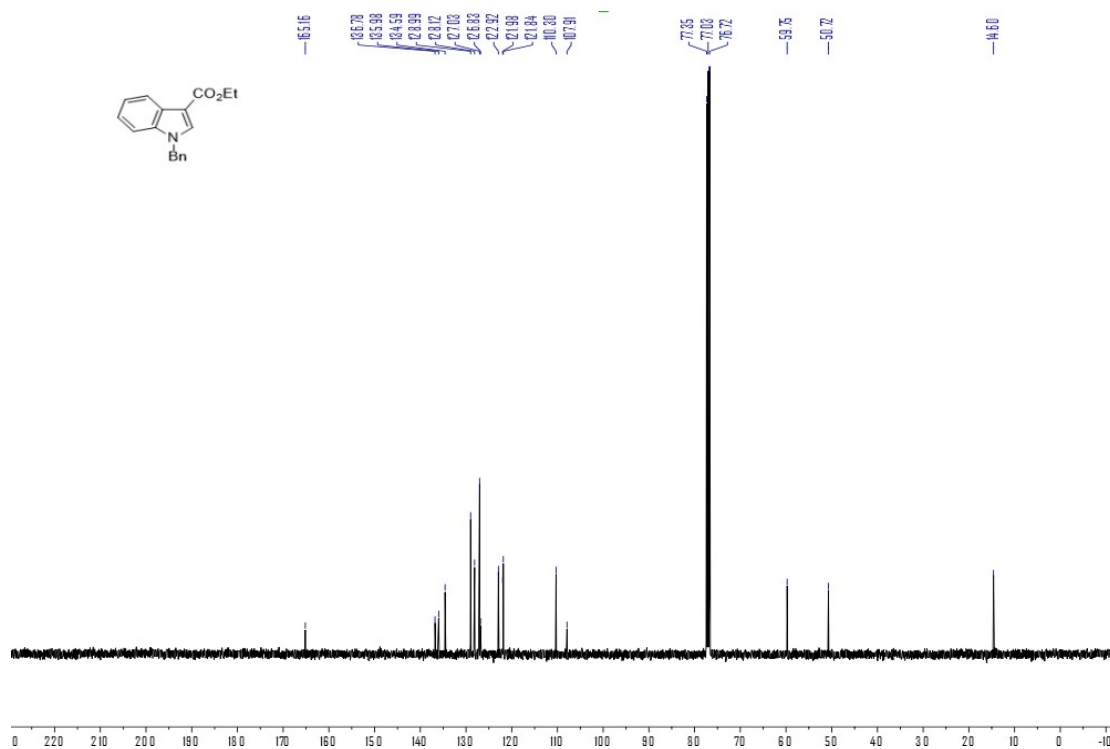



### 13. Reference

- [1] N. Kontonikas, P. Kotsampasakou, N. Sakalis, and V. J. Demopoulos, *Org. Prep. Proced. Int.*, **2019**, *51*, 147-152.
- [2] I. Nicolaou, C. Zika, and V. J. Demopoulos, *J. Med. Chem.*, **2004**, *47*, 2706-2709.
- [3] S. Butini, M. Brindisi, S. Gemma, P. Minetti, W. Cabri, G. Gallo, et al., *J. Med. Chem.*, **2012**, *55*, 6898-6915.
- [4] G. La Regina, R. Bai, A. Coluccia, V. Famigliani, S. Pelliccia, S. Passacantilli, et al., *J. Med. Chem.*, **2014**, *57*, 6531-6552.
